# Supplementary material for: Impact of Belimumab on Organ Damage in Systemic Lupus Erythematosus
Source: PubMed Central journal article supplement — Arthritis Care Res (Hoboken). 2022 Aug 4;74(11):1822–8. doi: 10.1002/acr.24901 (PMC9805003; doi:10.1002/acr.24901), 2022-08-04
Supplement: ACR-74-1822-s002.pdf [file ACR-74-1822-s002.pdf]

## ICMJE DISCLOSURE FORM

**Date:** 3/22/2022

**Your Name:** Anne Hammer

**Manuscript Title:** Impact of belimumab on organ damage in systemic lupus erythematosus

**Manuscript Number (if known):** ACR-21-0855.R1

In the interest of transparency, we ask you to disclose all relationships/activities/interests listed below that are related to the content of your manuscript. "Related" means any relation with for-profit or not-for-profit third parties whose interests may be affected by the content of the manuscript. Disclosure represents a commitment to transparency and does not necessarily indicate a bias. If you are in doubt about whether to list a relationship/activity/interest, it is preferable that you do so.

The following questions apply to the author's relationships/activities/interests as they relate to the current manuscript only.

The author's relationships/activities/interests should be defined broadly. For example, if your manuscript pertains to the epidemiology of hypertension, you should declare all relationships with manufacturers of antihypertensive medication, even if that medication is not mentioned in the manuscript.

In item #1 below, report all support for the work reported in this manuscript without time limit. For all other items, the time frame for disclosure is the past 36 months.

|                                                                                                                                                            | Name all entities with whom you have this relationship or indicate none (add rows as needed)                                                                            | Specifications/Comments (e.g., if payments were made to you or to your institution)                                                                                                                                                                                                                                                                                                                                                                                                                                                                              |                                                           |  |                                                                                                                                                            |  |                                           |  |
|------------------------------------------------------------------------------------------------------------------------------------------------------------|-------------------------------------------------------------------------------------------------------------------------------------------------------------------------|------------------------------------------------------------------------------------------------------------------------------------------------------------------------------------------------------------------------------------------------------------------------------------------------------------------------------------------------------------------------------------------------------------------------------------------------------------------------------------------------------------------------------------------------------------------|-----------------------------------------------------------|--|------------------------------------------------------------------------------------------------------------------------------------------------------------|--|-------------------------------------------|--|
| Time frame: Since the initial planning of the work                                                                                                         |                                                                                                                                                                         |                                                                                                                                                                                                                                                                                                                                                                                                                                                                                                                                                                  |                                                           |  |                                                                                                                                                            |  |                                           |  |
| 1                                                                                                                                                          | All support for the present manuscript (e.g., funding, provision of study materials, medical writing, article processing charges, etc.)<br>No time limit for this item. | <input type="checkbox"/> None<br><br><table border="1" style="width: 100%; border-collapse: collapse;"> <tr> <td style="width: 60%;">Funding for this research was provided by GlaxoSmithKline</td> <td style="width: 40%;"></td> </tr> <tr> <td>Medical writing support was provided by Casmira Brazaitis, PhD, of Fishawack Indicia Ltd, UK, part of Fishawack Health, and was funded by GlaxoSmithKline.</td> <td></td> </tr> <tr> <td colspan="2" style="text-align: right; font-size: small;">Click the tab key to add additional rows.</td> </tr> </table> | Funding for this research was provided by GlaxoSmithKline |  | Medical writing support was provided by Casmira Brazaitis, PhD, of Fishawack Indicia Ltd, UK, part of Fishawack Health, and was funded by GlaxoSmithKline. |  | Click the tab key to add additional rows. |  |
| Funding for this research was provided by GlaxoSmithKline                                                                                                  |                                                                                                                                                                         |                                                                                                                                                                                                                                                                                                                                                                                                                                                                                                                                                                  |                                                           |  |                                                                                                                                                            |  |                                           |  |
| Medical writing support was provided by Casmira Brazaitis, PhD, of Fishawack Indicia Ltd, UK, part of Fishawack Health, and was funded by GlaxoSmithKline. |                                                                                                                                                                         |                                                                                                                                                                                                                                                                                                                                                                                                                                                                                                                                                                  |                                                           |  |                                                                                                                                                            |  |                                           |  |
| Click the tab key to add additional rows.                                                                                                                  |                                                                                                                                                                         |                                                                                                                                                                                                                                                                                                                                                                                                                                                                                                                                                                  |                                                           |  |                                                                                                                                                            |  |                                           |  |
| Time frame: past 36 months                                                                                                                                 |                                                                                                                                                                         |                                                                                                                                                                                                                                                                                                                                                                                                                                                                                                                                                                  |                                                           |  |                                                                                                                                                            |  |                                           |  |
| 2                                                                                                                                                          | Grants or contracts from any entity (if not indicated in item #1 above).                                                                                                | <input checked="" type="checkbox"/> <b>None</b><br><br><table border="1" style="width: 100%; border-collapse: collapse;"> <tr><td style="width: 60%; height: 20px;"></td><td style="width: 40%;"></td></tr> <tr><td style="height: 20px;"></td><td></td></tr> <tr><td style="height: 20px;"></td><td></td></tr> </table>                                                                                                                                                                                                                                         |                                                           |  |                                                                                                                                                            |  |                                           |  |
|                                                                                                                                                            |                                                                                                                                                                         |                                                                                                                                                                                                                                                                                                                                                                                                                                                                                                                                                                  |                                                           |  |                                                                                                                                                            |  |                                           |  |
|                                                                                                                                                            |                                                                                                                                                                         |                                                                                                                                                                                                                                                                                                                                                                                                                                                                                                                                                                  |                                                           |  |                                                                                                                                                            |  |                                           |  |
|                                                                                                                                                            |                                                                                                                                                                         |                                                                                                                                                                                                                                                                                                                                                                                                                                                                                                                                                                  |                                                           |  |                                                                                                                                                            |  |                                           |  |

|           |                                                                                                              | Name all entities with whom you have this relationship or indicate none (add rows as needed) | Specifications/Comments (e.g., if payments were made to you or to your institution)                                                         |  |  |  |  |  |  |  |  |
|-----------|--------------------------------------------------------------------------------------------------------------|----------------------------------------------------------------------------------------------|---------------------------------------------------------------------------------------------------------------------------------------------|--|--|--|--|--|--|--|--|
| <b>3</b>  | Royalties or licenses                                                                                        | <input checked="" type="checkbox"/> <b>None</b>                                              |                                                                                                                                             |  |  |  |  |  |  |  |  |
| <b>4</b>  | Consulting fees                                                                                              | <input checked="" type="checkbox"/> <b>None</b>                                              | <table border="1"> <tr><td></td><td></td></tr> <tr><td></td><td></td></tr> <tr><td></td><td></td></tr> <tr><td></td><td></td></tr> </table> |  |  |  |  |  |  |  |  |
|           |                                                                                                              |                                                                                              |                                                                                                                                             |  |  |  |  |  |  |  |  |
|           |                                                                                                              |                                                                                              |                                                                                                                                             |  |  |  |  |  |  |  |  |
|           |                                                                                                              |                                                                                              |                                                                                                                                             |  |  |  |  |  |  |  |  |
|           |                                                                                                              |                                                                                              |                                                                                                                                             |  |  |  |  |  |  |  |  |
| <b>5</b>  | Payment or honoraria for lectures, presentations, speakers bureaus, manuscript writing or educational events | <input checked="" type="checkbox"/> <b>None</b>                                              |                                                                                                                                             |  |  |  |  |  |  |  |  |
| <b>6</b>  | Payment for expert testimony                                                                                 | <input checked="" type="checkbox"/> <b>None</b>                                              | <table border="1"> <tr><td></td><td></td></tr> <tr><td></td><td></td></tr> <tr><td></td><td></td></tr> </table>                             |  |  |  |  |  |  |  |  |
|           |                                                                                                              |                                                                                              |                                                                                                                                             |  |  |  |  |  |  |  |  |
|           |                                                                                                              |                                                                                              |                                                                                                                                             |  |  |  |  |  |  |  |  |
|           |                                                                                                              |                                                                                              |                                                                                                                                             |  |  |  |  |  |  |  |  |
| <b>7</b>  | Support for attending meetings and/or travel                                                                 | <input checked="" type="checkbox"/> <b>None</b>                                              | <table border="1"> <tr><td></td><td></td></tr> <tr><td></td><td></td></tr> <tr><td></td><td></td></tr> </table>                             |  |  |  |  |  |  |  |  |
|           |                                                                                                              |                                                                                              |                                                                                                                                             |  |  |  |  |  |  |  |  |
|           |                                                                                                              |                                                                                              |                                                                                                                                             |  |  |  |  |  |  |  |  |
|           |                                                                                                              |                                                                                              |                                                                                                                                             |  |  |  |  |  |  |  |  |
| <b>8</b>  | Patents planned, issued or pending                                                                           | <input checked="" type="checkbox"/> <b>None</b>                                              | <table border="1"> <tr><td></td><td></td></tr> <tr><td></td><td></td></tr> <tr><td></td><td></td></tr> </table>                             |  |  |  |  |  |  |  |  |
|           |                                                                                                              |                                                                                              |                                                                                                                                             |  |  |  |  |  |  |  |  |
|           |                                                                                                              |                                                                                              |                                                                                                                                             |  |  |  |  |  |  |  |  |
|           |                                                                                                              |                                                                                              |                                                                                                                                             |  |  |  |  |  |  |  |  |
| <b>9</b>  | Participation on a Data Safety Monitoring Board or Advisory Board                                            | <input checked="" type="checkbox"/> <b>None</b>                                              | <table border="1"> <tr><td></td><td></td></tr> <tr><td></td><td></td></tr> <tr><td></td><td></td></tr> </table>                             |  |  |  |  |  |  |  |  |
|           |                                                                                                              |                                                                                              |                                                                                                                                             |  |  |  |  |  |  |  |  |
|           |                                                                                                              |                                                                                              |                                                                                                                                             |  |  |  |  |  |  |  |  |
|           |                                                                                                              |                                                                                              |                                                                                                                                             |  |  |  |  |  |  |  |  |
| <b>10</b> | Leadership or fiduciary role in other board,                                                                 | <input checked="" type="checkbox"/> <b>None</b>                                              | <table border="1"> <tr><td></td><td></td></tr> </table>                                                                                     |  |  |  |  |  |  |  |  |
|           |                                                                                                              |                                                                                              |                                                                                                                                             |  |  |  |  |  |  |  |  |

|           |                                                                                  | Name all entities with whom you have this relationship or indicate none (add rows as needed)                                                                        | Specifications/Comments (e.g., if payments were made to you or to your institution) |
|-----------|----------------------------------------------------------------------------------|---------------------------------------------------------------------------------------------------------------------------------------------------------------------|-------------------------------------------------------------------------------------|
|           | society, committee or advocacy group, paid or unpaid                             |                                                                                                                                                                     |                                                                                     |
| <b>11</b> | Stock or stock options                                                           | <input type="checkbox"/> <b>None</b><br><input type="checkbox"/> Holds stocks and shares in GlaxoSmithKline<br><input type="checkbox"/><br><input type="checkbox"/> |                                                                                     |
| <b>12</b> | Receipt of equipment, materials, drugs, medical writing, gifts or other services | <input checked="" type="checkbox"/> <b>None</b><br><input type="checkbox"/><br><input type="checkbox"/><br><input type="checkbox"/>                                 |                                                                                     |
| <b>13</b> | Other financial or non-financial interests                                       | <input type="checkbox"/> <b>None</b><br><input type="checkbox"/> Employee of GlaxoSmithKline<br><input type="checkbox"/><br><input type="checkbox"/>                |                                                                                     |

Please place an "X" next to the following statement to indicate your agreement:

I certify that I have answered every question and have not altered the wording of any of the questions on this form.

## ICMJE DISCLOSURE FORM

**Date:** 3/22/2022

**Your Name:** Cynthia Aranow

**Manuscript Title:** Impact of belimumab on organ damage in systemic lupus erythematosus

**Manuscript Number (if known):** ACR-21-0855.R1

In the interest of transparency, we ask you to disclose all relationships/activities/interests listed below that are related to the content of your manuscript. "Related" means any relation with for-profit or not-for-profit third parties whose interests may be affected by the content of the manuscript. Disclosure represents a commitment to transparency and does not necessarily indicate a bias. If you are in doubt about whether to list a relationship/activity/interest, it is preferable that you do so.

The following questions apply to the author's relationships/activities/interests as they relate to the current manuscript only.

The author's relationships/activities/interests should be defined broadly. For example, if your manuscript pertains to the epidemiology of hypertension, you should declare all relationships with manufacturers of antihypertensive medication, even if that medication is not mentioned in the manuscript.

In item #1 below, report all support for the work reported in this manuscript without time limit. For all other items, the time frame for disclosure is the past 36 months.

|                                                                                                                                                            | Name all entities with whom you have this relationship or indicate none (add rows as needed)                                                                            | Specifications/Comments (e.g., if payments were made to you or to your institution)                                                                                                                                                                                                                                                                                                                                                                                                       |                                                           |  |                                                                                                                                                            |  |  |  |  |  |
|------------------------------------------------------------------------------------------------------------------------------------------------------------|-------------------------------------------------------------------------------------------------------------------------------------------------------------------------|-------------------------------------------------------------------------------------------------------------------------------------------------------------------------------------------------------------------------------------------------------------------------------------------------------------------------------------------------------------------------------------------------------------------------------------------------------------------------------------------|-----------------------------------------------------------|--|------------------------------------------------------------------------------------------------------------------------------------------------------------|--|--|--|--|--|
| Time frame: Since the initial planning of the work                                                                                                         |                                                                                                                                                                         |                                                                                                                                                                                                                                                                                                                                                                                                                                                                                           |                                                           |  |                                                                                                                                                            |  |  |  |  |  |
| 1                                                                                                                                                          | All support for the present manuscript (e.g., funding, provision of study materials, medical writing, article processing charges, etc.)<br>No time limit for this item. | <input type="checkbox"/> None <table border="1" style="width: 100%; margin-top: 10px;"> <tr> <td style="width: 60%;">Funding for this research was provided by GlaxoSmithKline</td> <td style="width: 40%;"></td> </tr> <tr> <td>Medical writing support was provided by Casmira Brazaitis, PhD, of Fishawack Indicia Ltd, UK, part of Fishawack Health, and was funded by GlaxoSmithKline.</td> <td></td> </tr> <tr> <td> </td> <td></td> </tr> <tr> <td> </td> <td></td> </tr> </table> | Funding for this research was provided by GlaxoSmithKline |  | Medical writing support was provided by Casmira Brazaitis, PhD, of Fishawack Indicia Ltd, UK, part of Fishawack Health, and was funded by GlaxoSmithKline. |  |  |  |  |  |
| Funding for this research was provided by GlaxoSmithKline                                                                                                  |                                                                                                                                                                         |                                                                                                                                                                                                                                                                                                                                                                                                                                                                                           |                                                           |  |                                                                                                                                                            |  |  |  |  |  |
| Medical writing support was provided by Casmira Brazaitis, PhD, of Fishawack Indicia Ltd, UK, part of Fishawack Health, and was funded by GlaxoSmithKline. |                                                                                                                                                                         |                                                                                                                                                                                                                                                                                                                                                                                                                                                                                           |                                                           |  |                                                                                                                                                            |  |  |  |  |  |
|                                                                                                                                                            |                                                                                                                                                                         |                                                                                                                                                                                                                                                                                                                                                                                                                                                                                           |                                                           |  |                                                                                                                                                            |  |  |  |  |  |
|                                                                                                                                                            |                                                                                                                                                                         |                                                                                                                                                                                                                                                                                                                                                                                                                                                                                           |                                                           |  |                                                                                                                                                            |  |  |  |  |  |
| Time frame: past 36 months                                                                                                                                 |                                                                                                                                                                         |                                                                                                                                                                                                                                                                                                                                                                                                                                                                                           |                                                           |  |                                                                                                                                                            |  |  |  |  |  |
| 2                                                                                                                                                          | Grants or contracts from any entity (if not indicated in item #1 above).                                                                                                | <input type="checkbox"/> None <table border="1" style="width: 100%; margin-top: 10px;"> <tr> <td style="width: 60%;">Grant/ research support from GSK</td> <td style="width: 40%;"></td> </tr> <tr> <td> </td> <td></td> </tr> <tr> <td> </td> <td></td> </tr> </table>                                                                                                                                                                                                                   | Grant/ research support from GSK                          |  |                                                                                                                                                            |  |  |  |  |  |
| Grant/ research support from GSK                                                                                                                           |                                                                                                                                                                         |                                                                                                                                                                                                                                                                                                                                                                                                                                                                                           |                                                           |  |                                                                                                                                                            |  |  |  |  |  |
|                                                                                                                                                            |                                                                                                                                                                         |                                                                                                                                                                                                                                                                                                                                                                                                                                                                                           |                                                           |  |                                                                                                                                                            |  |  |  |  |  |
|                                                                                                                                                            |                                                                                                                                                                         |                                                                                                                                                                                                                                                                                                                                                                                                                                                                                           |                                                           |  |                                                                                                                                                            |  |  |  |  |  |

|    |                                                                                                              | Name all entities with whom you have this relationship or indicate none (add rows as needed) | Specifications/Comments (e.g., if payments were made to you or to your institution)                             |  |  |  |  |  |  |
|----|--------------------------------------------------------------------------------------------------------------|----------------------------------------------------------------------------------------------|-----------------------------------------------------------------------------------------------------------------|--|--|--|--|--|--|
| 3  | Royalties or licenses                                                                                        | <input checked="" type="checkbox"/> None                                                     |                                                                                                                 |  |  |  |  |  |  |
| 4  | Consulting fees                                                                                              | <input checked="" type="checkbox"/> None                                                     | <table border="1"> <tr><td></td><td></td></tr> <tr><td></td><td></td></tr> <tr><td></td><td></td></tr> </table> |  |  |  |  |  |  |
|    |                                                                                                              |                                                                                              |                                                                                                                 |  |  |  |  |  |  |
|    |                                                                                                              |                                                                                              |                                                                                                                 |  |  |  |  |  |  |
|    |                                                                                                              |                                                                                              |                                                                                                                 |  |  |  |  |  |  |
| 5  | Payment or honoraria for lectures, presentations, speakers bureaus, manuscript writing or educational events | <input checked="" type="checkbox"/> None                                                     |                                                                                                                 |  |  |  |  |  |  |
| 6  | Payment for expert testimony                                                                                 | <input checked="" type="checkbox"/> None                                                     | <table border="1"> <tr><td></td><td></td></tr> <tr><td></td><td></td></tr> <tr><td></td><td></td></tr> </table> |  |  |  |  |  |  |
|    |                                                                                                              |                                                                                              |                                                                                                                 |  |  |  |  |  |  |
|    |                                                                                                              |                                                                                              |                                                                                                                 |  |  |  |  |  |  |
|    |                                                                                                              |                                                                                              |                                                                                                                 |  |  |  |  |  |  |
| 7  | Support for attending meetings and/or travel                                                                 | <input checked="" type="checkbox"/> None                                                     | <table border="1"> <tr><td></td><td></td></tr> <tr><td></td><td></td></tr> <tr><td></td><td></td></tr> </table> |  |  |  |  |  |  |
|    |                                                                                                              |                                                                                              |                                                                                                                 |  |  |  |  |  |  |
|    |                                                                                                              |                                                                                              |                                                                                                                 |  |  |  |  |  |  |
|    |                                                                                                              |                                                                                              |                                                                                                                 |  |  |  |  |  |  |
| 8  | Patents planned, issued or pending                                                                           | <input checked="" type="checkbox"/> None                                                     | <table border="1"> <tr><td></td><td></td></tr> <tr><td></td><td></td></tr> <tr><td></td><td></td></tr> </table> |  |  |  |  |  |  |
|    |                                                                                                              |                                                                                              |                                                                                                                 |  |  |  |  |  |  |
|    |                                                                                                              |                                                                                              |                                                                                                                 |  |  |  |  |  |  |
|    |                                                                                                              |                                                                                              |                                                                                                                 |  |  |  |  |  |  |
| 9  | Participation on a Data Safety Monitoring Board or Advisory Board                                            | <input checked="" type="checkbox"/> None                                                     | <table border="1"> <tr><td></td><td></td></tr> <tr><td></td><td></td></tr> <tr><td></td><td></td></tr> </table> |  |  |  |  |  |  |
|    |                                                                                                              |                                                                                              |                                                                                                                 |  |  |  |  |  |  |
|    |                                                                                                              |                                                                                              |                                                                                                                 |  |  |  |  |  |  |
|    |                                                                                                              |                                                                                              |                                                                                                                 |  |  |  |  |  |  |
| 10 | Leadership or fiduciary role in other board,                                                                 | <input checked="" type="checkbox"/> None                                                     | <table border="1"> <tr><td></td><td></td></tr> </table>                                                         |  |  |  |  |  |  |
|    |                                                                                                              |                                                                                              |                                                                                                                 |  |  |  |  |  |  |

|           |                                                                                  | Name all entities with whom you have this relationship or indicate none (add rows as needed) | Specifications/Comments (e.g., if payments were made to you or to your institution) |
|-----------|----------------------------------------------------------------------------------|----------------------------------------------------------------------------------------------|-------------------------------------------------------------------------------------|
|           | society, committee or advocacy group, paid or unpaid                             |                                                                                              |                                                                                     |
| <b>11</b> | Stock or stock options                                                           | <input checked="" type="checkbox"/> <b>None</b>                                              |                                                                                     |
|           |                                                                                  |                                                                                              |                                                                                     |
|           |                                                                                  |                                                                                              |                                                                                     |
| <b>12</b> | Receipt of equipment, materials, drugs, medical writing, gifts or other services | <input checked="" type="checkbox"/> <b>None</b>                                              |                                                                                     |
|           |                                                                                  |                                                                                              |                                                                                     |
|           |                                                                                  |                                                                                              |                                                                                     |
| <b>13</b> | Other financial or non-financial interests                                       | <input checked="" type="checkbox"/> <b>None</b>                                              |                                                                                     |
|           |                                                                                  |                                                                                              |                                                                                     |
|           |                                                                                  |                                                                                              |                                                                                     |

Please place an "X" next to the following statement to indicate your agreement:

I certify that I have answered every question and have not altered the wording of any of the questions on this form.

## ICMJE DISCLOSURE FORM

**Date:** 3/22/2022

**Your Name:** Damon L Bass

**Manuscript Title:** Impact of belimumab on organ damage in systemic lupus erythematosus

**Manuscript Number (if known):** ACR-21-0855.R1

In the interest of transparency, we ask you to disclose all relationships/activities/interests listed below that are related to the content of your manuscript. "Related" means any relation with for-profit or not-for-profit third parties whose interests may be affected by the content of the manuscript. Disclosure represents a commitment to transparency and does not necessarily indicate a bias. If you are in doubt about whether to list a relationship/activity/interest, it is preferable that you do so.

The following questions apply to the author's relationships/activities/interests as they relate to the current manuscript only.

The author's relationships/activities/interests should be defined broadly. For example, if your manuscript pertains to the epidemiology of hypertension, you should declare all relationships with manufacturers of antihypertensive medication, even if that medication is not mentioned in the manuscript.

In item #1 below, report all support for the work reported in this manuscript without time limit. For all other items, the time frame for disclosure is the past 36 months.

|                                                                                                                                                            | Name all entities with whom you have this relationship or indicate none (add rows as needed)                                                                            | Specifications/Comments (e.g., if payments were made to you or to your institution)                                                                                                                                                                                                                                                                                                                                                                                                                                                                              |                                                           |  |                                                                                                                                                            |  |                                           |  |
|------------------------------------------------------------------------------------------------------------------------------------------------------------|-------------------------------------------------------------------------------------------------------------------------------------------------------------------------|------------------------------------------------------------------------------------------------------------------------------------------------------------------------------------------------------------------------------------------------------------------------------------------------------------------------------------------------------------------------------------------------------------------------------------------------------------------------------------------------------------------------------------------------------------------|-----------------------------------------------------------|--|------------------------------------------------------------------------------------------------------------------------------------------------------------|--|-------------------------------------------|--|
| Time frame: Since the initial planning of the work                                                                                                         |                                                                                                                                                                         |                                                                                                                                                                                                                                                                                                                                                                                                                                                                                                                                                                  |                                                           |  |                                                                                                                                                            |  |                                           |  |
| 1                                                                                                                                                          | All support for the present manuscript (e.g., funding, provision of study materials, medical writing, article processing charges, etc.)<br>No time limit for this item. | <input type="checkbox"/> None<br><br><table border="1" style="width: 100%; border-collapse: collapse;"> <tr> <td style="width: 60%;">Funding for this research was provided by GlaxoSmithKline</td> <td style="width: 40%;"></td> </tr> <tr> <td>Medical writing support was provided by Casmira Brazaitis, PhD, of Fishawack Indicia Ltd, UK, part of Fishawack Health, and was funded by GlaxoSmithKline.</td> <td></td> </tr> <tr> <td colspan="2" style="text-align: right; font-size: small;">Click the tab key to add additional rows.</td> </tr> </table> | Funding for this research was provided by GlaxoSmithKline |  | Medical writing support was provided by Casmira Brazaitis, PhD, of Fishawack Indicia Ltd, UK, part of Fishawack Health, and was funded by GlaxoSmithKline. |  | Click the tab key to add additional rows. |  |
| Funding for this research was provided by GlaxoSmithKline                                                                                                  |                                                                                                                                                                         |                                                                                                                                                                                                                                                                                                                                                                                                                                                                                                                                                                  |                                                           |  |                                                                                                                                                            |  |                                           |  |
| Medical writing support was provided by Casmira Brazaitis, PhD, of Fishawack Indicia Ltd, UK, part of Fishawack Health, and was funded by GlaxoSmithKline. |                                                                                                                                                                         |                                                                                                                                                                                                                                                                                                                                                                                                                                                                                                                                                                  |                                                           |  |                                                                                                                                                            |  |                                           |  |
| Click the tab key to add additional rows.                                                                                                                  |                                                                                                                                                                         |                                                                                                                                                                                                                                                                                                                                                                                                                                                                                                                                                                  |                                                           |  |                                                                                                                                                            |  |                                           |  |
| Time frame: past 36 months                                                                                                                                 |                                                                                                                                                                         |                                                                                                                                                                                                                                                                                                                                                                                                                                                                                                                                                                  |                                                           |  |                                                                                                                                                            |  |                                           |  |
| 2                                                                                                                                                          | Grants or contracts from any entity (if not indicated in item #1 above).                                                                                                | <input checked="" type="checkbox"/> None<br><br><table border="1" style="width: 100%; border-collapse: collapse;"> <tr><td style="width: 60%; height: 20px;"></td><td style="width: 40%;"></td></tr> <tr><td style="height: 20px;"></td><td></td></tr> <tr><td style="height: 20px;"></td><td></td></tr> </table>                                                                                                                                                                                                                                                |                                                           |  |                                                                                                                                                            |  |                                           |  |
|                                                                                                                                                            |                                                                                                                                                                         |                                                                                                                                                                                                                                                                                                                                                                                                                                                                                                                                                                  |                                                           |  |                                                                                                                                                            |  |                                           |  |
|                                                                                                                                                            |                                                                                                                                                                         |                                                                                                                                                                                                                                                                                                                                                                                                                                                                                                                                                                  |                                                           |  |                                                                                                                                                            |  |                                           |  |
|                                                                                                                                                            |                                                                                                                                                                         |                                                                                                                                                                                                                                                                                                                                                                                                                                                                                                                                                                  |                                                           |  |                                                                                                                                                            |  |                                           |  |
| 3                                                                                                                                                          | Royalties or licenses                                                                                                                                                   | <input checked="" type="checkbox"/> None                                                                                                                                                                                                                                                                                                                                                                                                                                                                                                                         |                                                           |  |                                                                                                                                                            |  |                                           |  |

|           |                                                                                                              | Name all entities with whom you have this relationship or indicate none (add rows as needed)                                                                                                                                                                                                                                                                           | Specifications/Comments (e.g., if payments were made to you or to your institution) |  |  |  |  |  |  |  |  |
|-----------|--------------------------------------------------------------------------------------------------------------|------------------------------------------------------------------------------------------------------------------------------------------------------------------------------------------------------------------------------------------------------------------------------------------------------------------------------------------------------------------------|-------------------------------------------------------------------------------------|--|--|--|--|--|--|--|--|
| <b>4</b>  | Consulting fees                                                                                              | <input checked="" type="checkbox"/> <b>None</b><br><table border="1" style="width: 100%; border-collapse: collapse;"> <tr><td style="width: 50%; height: 15px;"></td><td style="width: 50%;"></td></tr> <tr><td style="height: 15px;"></td><td></td></tr> <tr><td style="height: 15px;"></td><td></td></tr> <tr><td style="height: 15px;"></td><td></td></tr> </table> |                                                                                     |  |  |  |  |  |  |  |  |
|           |                                                                                                              |                                                                                                                                                                                                                                                                                                                                                                        |                                                                                     |  |  |  |  |  |  |  |  |
|           |                                                                                                              |                                                                                                                                                                                                                                                                                                                                                                        |                                                                                     |  |  |  |  |  |  |  |  |
|           |                                                                                                              |                                                                                                                                                                                                                                                                                                                                                                        |                                                                                     |  |  |  |  |  |  |  |  |
|           |                                                                                                              |                                                                                                                                                                                                                                                                                                                                                                        |                                                                                     |  |  |  |  |  |  |  |  |
| <b>5</b>  | Payment or honoraria for lectures, presentations, speakers bureaus, manuscript writing or educational events | <input checked="" type="checkbox"/> <b>None</b>                                                                                                                                                                                                                                                                                                                        |                                                                                     |  |  |  |  |  |  |  |  |
| <b>6</b>  | Payment for expert testimony                                                                                 | <input checked="" type="checkbox"/> <b>None</b><br><table border="1" style="width: 100%; border-collapse: collapse;"> <tr><td style="width: 50%; height: 15px;"></td><td style="width: 50%;"></td></tr> <tr><td style="height: 15px;"></td><td></td></tr> <tr><td style="height: 15px;"></td><td></td></tr> </table>                                                   |                                                                                     |  |  |  |  |  |  |  |  |
|           |                                                                                                              |                                                                                                                                                                                                                                                                                                                                                                        |                                                                                     |  |  |  |  |  |  |  |  |
|           |                                                                                                              |                                                                                                                                                                                                                                                                                                                                                                        |                                                                                     |  |  |  |  |  |  |  |  |
|           |                                                                                                              |                                                                                                                                                                                                                                                                                                                                                                        |                                                                                     |  |  |  |  |  |  |  |  |
| <b>7</b>  | Support for attending meetings and/or travel                                                                 | <input checked="" type="checkbox"/> <b>None</b><br><table border="1" style="width: 100%; border-collapse: collapse;"> <tr><td style="width: 50%; height: 15px;"></td><td style="width: 50%;"></td></tr> <tr><td style="height: 15px;"></td><td></td></tr> <tr><td style="height: 15px;"></td><td></td></tr> </table>                                                   |                                                                                     |  |  |  |  |  |  |  |  |
|           |                                                                                                              |                                                                                                                                                                                                                                                                                                                                                                        |                                                                                     |  |  |  |  |  |  |  |  |
|           |                                                                                                              |                                                                                                                                                                                                                                                                                                                                                                        |                                                                                     |  |  |  |  |  |  |  |  |
|           |                                                                                                              |                                                                                                                                                                                                                                                                                                                                                                        |                                                                                     |  |  |  |  |  |  |  |  |
| <b>8</b>  | Patents planned, issued or pending                                                                           | <input checked="" type="checkbox"/> <b>None</b><br><table border="1" style="width: 100%; border-collapse: collapse;"> <tr><td style="width: 50%; height: 15px;"></td><td style="width: 50%;"></td></tr> <tr><td style="height: 15px;"></td><td></td></tr> <tr><td style="height: 15px;"></td><td></td></tr> </table>                                                   |                                                                                     |  |  |  |  |  |  |  |  |
|           |                                                                                                              |                                                                                                                                                                                                                                                                                                                                                                        |                                                                                     |  |  |  |  |  |  |  |  |
|           |                                                                                                              |                                                                                                                                                                                                                                                                                                                                                                        |                                                                                     |  |  |  |  |  |  |  |  |
|           |                                                                                                              |                                                                                                                                                                                                                                                                                                                                                                        |                                                                                     |  |  |  |  |  |  |  |  |
| <b>9</b>  | Participation on a Data Safety Monitoring Board or Advisory Board                                            | <input checked="" type="checkbox"/> <b>None</b><br><table border="1" style="width: 100%; border-collapse: collapse;"> <tr><td style="width: 50%; height: 15px;"></td><td style="width: 50%;"></td></tr> <tr><td style="height: 15px;"></td><td></td></tr> <tr><td style="height: 15px;"></td><td></td></tr> </table>                                                   |                                                                                     |  |  |  |  |  |  |  |  |
|           |                                                                                                              |                                                                                                                                                                                                                                                                                                                                                                        |                                                                                     |  |  |  |  |  |  |  |  |
|           |                                                                                                              |                                                                                                                                                                                                                                                                                                                                                                        |                                                                                     |  |  |  |  |  |  |  |  |
|           |                                                                                                              |                                                                                                                                                                                                                                                                                                                                                                        |                                                                                     |  |  |  |  |  |  |  |  |
| <b>10</b> | Leadership or fiduciary role in other board, society, committee or advocacy group, paid or unpaid            | <input checked="" type="checkbox"/> <b>None</b><br><table border="1" style="width: 100%; border-collapse: collapse;"> <tr><td style="width: 50%; height: 15px;"></td><td style="width: 50%;"></td></tr> <tr><td style="height: 15px;"></td><td></td></tr> <tr><td style="height: 15px;"></td><td></td></tr> </table>                                                   |                                                                                     |  |  |  |  |  |  |  |  |
|           |                                                                                                              |                                                                                                                                                                                                                                                                                                                                                                        |                                                                                     |  |  |  |  |  |  |  |  |
|           |                                                                                                              |                                                                                                                                                                                                                                                                                                                                                                        |                                                                                     |  |  |  |  |  |  |  |  |
|           |                                                                                                              |                                                                                                                                                                                                                                                                                                                                                                        |                                                                                     |  |  |  |  |  |  |  |  |



|    |                                                                                  | Name all entities with whom you have this relationship or indicate none (add rows as needed) | Specifications/Comments (e.g., if payments were made to you or to your institution) |
|----|----------------------------------------------------------------------------------|----------------------------------------------------------------------------------------------|-------------------------------------------------------------------------------------|
| 11 | Stock or stock options                                                           | <input type="checkbox"/> None                                                                |                                                                                     |
|    |                                                                                  | Holdings stocks and shares in GlaxoSmithKline                                                |                                                                                     |
|    |                                                                                  |                                                                                              |                                                                                     |
| 12 | Receipt of equipment, materials, drugs, medical writing, gifts or other services | <input checked="" type="checkbox"/> None                                                     |                                                                                     |
|    |                                                                                  |                                                                                              |                                                                                     |
|    |                                                                                  |                                                                                              |                                                                                     |
| 13 | Other financial or non-financial interests                                       | <input type="checkbox"/> None                                                                |                                                                                     |
|    |                                                                                  | Employee of GlaxoSmithKline                                                                  |                                                                                     |
|    |                                                                                  |                                                                                              |                                                                                     |

Please place an "X" next to the following statement to indicate your agreement:

I certify that I have answered every question and have not altered the wording of any of the questions on this form.

## ICMJE DISCLOSURE FORM

**Date:** 3/22/2022

**Your Name:** Deven Chauhan

**Manuscript Title:** Impact of belimumab on organ damage in systemic lupus erythematosus

**Manuscript Number (if known):** ACR-21-0855.R1

In the interest of transparency, we ask you to disclose all relationships/activities/interests listed below that are related to the content of your manuscript. "Related" means any relation with for-profit or not-for-profit third parties whose interests may be affected by the content of the manuscript. Disclosure represents a commitment to transparency and does not necessarily indicate a bias. If you are in doubt about whether to list a relationship/activity/interest, it is preferable that you do so.

The following questions apply to the author's relationships/activities/interests as they relate to the current manuscript only.

The author's relationships/activities/interests should be defined broadly. For example, if your manuscript pertains to the epidemiology of hypertension, you should declare all relationships with manufacturers of antihypertensive medication, even if that medication is not mentioned in the manuscript.

In item #1 below, report all support for the work reported in this manuscript without time limit. For all other items, the time frame for disclosure is the past 36 months.

|                                                                                                                                                            | Name all entities with whom you have this relationship or indicate none (add rows as needed)                                                                            | Specifications/Comments (e.g., if payments were made to you or to your institution)                                                                                                                                                                                                                                                                                                                                                                                                                         |                                                           |  |                                                                                                                                                            |  |  |  |  |  |
|------------------------------------------------------------------------------------------------------------------------------------------------------------|-------------------------------------------------------------------------------------------------------------------------------------------------------------------------|-------------------------------------------------------------------------------------------------------------------------------------------------------------------------------------------------------------------------------------------------------------------------------------------------------------------------------------------------------------------------------------------------------------------------------------------------------------------------------------------------------------|-----------------------------------------------------------|--|------------------------------------------------------------------------------------------------------------------------------------------------------------|--|--|--|--|--|
| Time frame: Since the initial planning of the work                                                                                                         |                                                                                                                                                                         |                                                                                                                                                                                                                                                                                                                                                                                                                                                                                                             |                                                           |  |                                                                                                                                                            |  |  |  |  |  |
| 1                                                                                                                                                          | All support for the present manuscript (e.g., funding, provision of study materials, medical writing, article processing charges, etc.)<br>No time limit for this item. | <input type="checkbox"/> None<br><br><table border="1" style="width: 100%; border-collapse: collapse;"> <tr> <td style="width: 60%;">Funding for this research was provided by GlaxoSmithKline</td> <td style="width: 40%;"></td> </tr> <tr> <td>Medical writing support was provided by Casmira Brazaitis, PhD, of Fishawack Indicia Ltd, UK, part of Fishawack Health, and was funded by GlaxoSmithKline.</td> <td></td> </tr> <tr> <td> </td> <td> </td> </tr> <tr> <td> </td> <td> </td> </tr> </table> | Funding for this research was provided by GlaxoSmithKline |  | Medical writing support was provided by Casmira Brazaitis, PhD, of Fishawack Indicia Ltd, UK, part of Fishawack Health, and was funded by GlaxoSmithKline. |  |  |  |  |  |
| Funding for this research was provided by GlaxoSmithKline                                                                                                  |                                                                                                                                                                         |                                                                                                                                                                                                                                                                                                                                                                                                                                                                                                             |                                                           |  |                                                                                                                                                            |  |  |  |  |  |
| Medical writing support was provided by Casmira Brazaitis, PhD, of Fishawack Indicia Ltd, UK, part of Fishawack Health, and was funded by GlaxoSmithKline. |                                                                                                                                                                         |                                                                                                                                                                                                                                                                                                                                                                                                                                                                                                             |                                                           |  |                                                                                                                                                            |  |  |  |  |  |
|                                                                                                                                                            |                                                                                                                                                                         |                                                                                                                                                                                                                                                                                                                                                                                                                                                                                                             |                                                           |  |                                                                                                                                                            |  |  |  |  |  |
|                                                                                                                                                            |                                                                                                                                                                         |                                                                                                                                                                                                                                                                                                                                                                                                                                                                                                             |                                                           |  |                                                                                                                                                            |  |  |  |  |  |
| Click the tab key to add additional rows.                                                                                                                  |                                                                                                                                                                         |                                                                                                                                                                                                                                                                                                                                                                                                                                                                                                             |                                                           |  |                                                                                                                                                            |  |  |  |  |  |
| Time frame: past 36 months                                                                                                                                 |                                                                                                                                                                         |                                                                                                                                                                                                                                                                                                                                                                                                                                                                                                             |                                                           |  |                                                                                                                                                            |  |  |  |  |  |
| 2                                                                                                                                                          | Grants or contracts from any entity (if not indicated in item #1 above).                                                                                                | <input checked="" type="checkbox"/> None<br><br><table border="1" style="width: 100%; border-collapse: collapse;"> <tr> <td style="width: 60%; height: 20px;"> </td> <td style="width: 40%;"> </td> </tr> <tr> <td style="height: 20px;"> </td> <td> </td> </tr> <tr> <td style="height: 20px;"> </td> <td> </td> </tr> </table>                                                                                                                                                                            |                                                           |  |                                                                                                                                                            |  |  |  |  |  |
|                                                                                                                                                            |                                                                                                                                                                         |                                                                                                                                                                                                                                                                                                                                                                                                                                                                                                             |                                                           |  |                                                                                                                                                            |  |  |  |  |  |
|                                                                                                                                                            |                                                                                                                                                                         |                                                                                                                                                                                                                                                                                                                                                                                                                                                                                                             |                                                           |  |                                                                                                                                                            |  |  |  |  |  |
|                                                                                                                                                            |                                                                                                                                                                         |                                                                                                                                                                                                                                                                                                                                                                                                                                                                                                             |                                                           |  |                                                                                                                                                            |  |  |  |  |  |

|    |                                                                                                              | Name all entities with whom you have this relationship or indicate none (add rows as needed) | Specifications/Comments (e.g., if payments were made to you or to your institution)                                                         |  |  |  |  |  |  |  |  |
|----|--------------------------------------------------------------------------------------------------------------|----------------------------------------------------------------------------------------------|---------------------------------------------------------------------------------------------------------------------------------------------|--|--|--|--|--|--|--|--|
| 3  | Royalties or licenses                                                                                        | <input checked="" type="checkbox"/> None                                                     |                                                                                                                                             |  |  |  |  |  |  |  |  |
| 4  | Consulting fees                                                                                              | <input checked="" type="checkbox"/> None                                                     | <table border="1"> <tr><td></td><td></td></tr> <tr><td></td><td></td></tr> <tr><td></td><td></td></tr> <tr><td></td><td></td></tr> </table> |  |  |  |  |  |  |  |  |
|    |                                                                                                              |                                                                                              |                                                                                                                                             |  |  |  |  |  |  |  |  |
|    |                                                                                                              |                                                                                              |                                                                                                                                             |  |  |  |  |  |  |  |  |
|    |                                                                                                              |                                                                                              |                                                                                                                                             |  |  |  |  |  |  |  |  |
|    |                                                                                                              |                                                                                              |                                                                                                                                             |  |  |  |  |  |  |  |  |
| 5  | Payment or honoraria for lectures, presentations, speakers bureaus, manuscript writing or educational events | <input checked="" type="checkbox"/> None                                                     |                                                                                                                                             |  |  |  |  |  |  |  |  |
| 6  | Payment for expert testimony                                                                                 | <input checked="" type="checkbox"/> None                                                     | <table border="1"> <tr><td></td><td></td></tr> <tr><td></td><td></td></tr> <tr><td></td><td></td></tr> </table>                             |  |  |  |  |  |  |  |  |
|    |                                                                                                              |                                                                                              |                                                                                                                                             |  |  |  |  |  |  |  |  |
|    |                                                                                                              |                                                                                              |                                                                                                                                             |  |  |  |  |  |  |  |  |
|    |                                                                                                              |                                                                                              |                                                                                                                                             |  |  |  |  |  |  |  |  |
| 7  | Support for attending meetings and/or travel                                                                 | <input checked="" type="checkbox"/> None                                                     | <table border="1"> <tr><td></td><td></td></tr> <tr><td></td><td></td></tr> <tr><td></td><td></td></tr> </table>                             |  |  |  |  |  |  |  |  |
|    |                                                                                                              |                                                                                              |                                                                                                                                             |  |  |  |  |  |  |  |  |
|    |                                                                                                              |                                                                                              |                                                                                                                                             |  |  |  |  |  |  |  |  |
|    |                                                                                                              |                                                                                              |                                                                                                                                             |  |  |  |  |  |  |  |  |
| 8  | Patents planned, issued or pending                                                                           | <input checked="" type="checkbox"/> None                                                     | <table border="1"> <tr><td></td><td></td></tr> <tr><td></td><td></td></tr> <tr><td></td><td></td></tr> </table>                             |  |  |  |  |  |  |  |  |
|    |                                                                                                              |                                                                                              |                                                                                                                                             |  |  |  |  |  |  |  |  |
|    |                                                                                                              |                                                                                              |                                                                                                                                             |  |  |  |  |  |  |  |  |
|    |                                                                                                              |                                                                                              |                                                                                                                                             |  |  |  |  |  |  |  |  |
| 9  | Participation on a Data Safety Monitoring Board or Advisory Board                                            | <input checked="" type="checkbox"/> None                                                     | <table border="1"> <tr><td></td><td></td></tr> <tr><td></td><td></td></tr> <tr><td></td><td></td></tr> </table>                             |  |  |  |  |  |  |  |  |
|    |                                                                                                              |                                                                                              |                                                                                                                                             |  |  |  |  |  |  |  |  |
|    |                                                                                                              |                                                                                              |                                                                                                                                             |  |  |  |  |  |  |  |  |
|    |                                                                                                              |                                                                                              |                                                                                                                                             |  |  |  |  |  |  |  |  |
| 10 | Leadership or fiduciary role in other board,                                                                 | <input checked="" type="checkbox"/> None                                                     | <table border="1"> <tr><td></td><td></td></tr> </table>                                                                                     |  |  |  |  |  |  |  |  |
|    |                                                                                                              |                                                                                              |                                                                                                                                             |  |  |  |  |  |  |  |  |

|           |                                                                                  | Name all entities with whom you have this relationship or indicate none (add rows as needed)                                                                        | Specifications/Comments (e.g., if payments were made to you or to your institution) |
|-----------|----------------------------------------------------------------------------------|---------------------------------------------------------------------------------------------------------------------------------------------------------------------|-------------------------------------------------------------------------------------|
|           | society, committee or advocacy group, paid or unpaid                             |                                                                                                                                                                     |                                                                                     |
| <b>11</b> | Stock or stock options                                                           | <input type="checkbox"/> <b>None</b><br><input type="checkbox"/> Holds stocks and shares in GlaxoSmithKline<br><input type="checkbox"/><br><input type="checkbox"/> |                                                                                     |
| <b>12</b> | Receipt of equipment, materials, drugs, medical writing, gifts or other services | <input checked="" type="checkbox"/> <b>None</b><br><input type="checkbox"/><br><input type="checkbox"/><br><input type="checkbox"/>                                 |                                                                                     |
| <b>13</b> | Other financial or non-financial interests                                       | <input type="checkbox"/> <b>None</b><br><input type="checkbox"/> Employee of GlaxoSmithKline<br><input type="checkbox"/><br><input type="checkbox"/>                |                                                                                     |

Please place an "X" next to the following statement to indicate your agreement:

I certify that I have answered every question and have not altered the wording of any of the questions on this form.

## ICMJE DISCLOSURE FORM

**Date:** 3/22/2022

**Your Name:** David A Roth

**Manuscript Title:** Impact of belimumab on organ damage in systemic lupus erythematosus

**Manuscript Number (if known):** ACR-21-0855.R1

In the interest of transparency, we ask you to disclose all relationships/activities/interests listed below that are related to the content of your manuscript. "Related" means any relation with for-profit or not-for-profit third parties whose interests may be affected by the content of the manuscript. Disclosure represents a commitment to transparency and does not necessarily indicate a bias. If you are in doubt about whether to list a relationship/activity/interest, it is preferable that you do so.

The following questions apply to the author's relationships/activities/interests as they relate to the current manuscript only.

The author's relationships/activities/interests should be defined broadly. For example, if your manuscript pertains to the epidemiology of hypertension, you should declare all relationships with manufacturers of antihypertensive medication, even if that medication is not mentioned in the manuscript.

In item #1 below, report all support for the work reported in this manuscript without time limit. For all other items, the time frame for disclosure is the past 36 months.

|                                                                                                                                                            | Name all entities with whom you have this relationship or indicate none (add rows as needed)                                                                            | Specifications/Comments (e.g., if payments were made to you or to your institution)                                                                                                                                                                                                                                                                                                                                                                                                                                                                                                                       |                                                           |  |                                                                                                                                                            |  |  |  |  |  |
|------------------------------------------------------------------------------------------------------------------------------------------------------------|-------------------------------------------------------------------------------------------------------------------------------------------------------------------------|-----------------------------------------------------------------------------------------------------------------------------------------------------------------------------------------------------------------------------------------------------------------------------------------------------------------------------------------------------------------------------------------------------------------------------------------------------------------------------------------------------------------------------------------------------------------------------------------------------------|-----------------------------------------------------------|--|------------------------------------------------------------------------------------------------------------------------------------------------------------|--|--|--|--|--|
| Time frame: Since the initial planning of the work                                                                                                         |                                                                                                                                                                         |                                                                                                                                                                                                                                                                                                                                                                                                                                                                                                                                                                                                           |                                                           |  |                                                                                                                                                            |  |  |  |  |  |
| 1                                                                                                                                                          | All support for the present manuscript (e.g., funding, provision of study materials, medical writing, article processing charges, etc.)<br>No time limit for this item. | <input type="checkbox"/> None<br><br><table border="1" style="width: 100%; border-collapse: collapse;"> <tr> <td style="width: 60%;">Funding for this research was provided by GlaxoSmithKline</td> <td style="width: 40%;"></td> </tr> <tr> <td>Medical writing support was provided by Casmira Brazaitis, PhD, of Fishawack Indicia Ltd, UK, part of Fishawack Health, and was funded by GlaxoSmithKline.</td> <td></td> </tr> <tr> <td> </td> <td> </td> </tr> <tr> <td> </td> <td> </td> </tr> </table> <p style="text-align: right; font-size: small;">Click the tab key to add additional rows.</p> | Funding for this research was provided by GlaxoSmithKline |  | Medical writing support was provided by Casmira Brazaitis, PhD, of Fishawack Indicia Ltd, UK, part of Fishawack Health, and was funded by GlaxoSmithKline. |  |  |  |  |  |
| Funding for this research was provided by GlaxoSmithKline                                                                                                  |                                                                                                                                                                         |                                                                                                                                                                                                                                                                                                                                                                                                                                                                                                                                                                                                           |                                                           |  |                                                                                                                                                            |  |  |  |  |  |
| Medical writing support was provided by Casmira Brazaitis, PhD, of Fishawack Indicia Ltd, UK, part of Fishawack Health, and was funded by GlaxoSmithKline. |                                                                                                                                                                         |                                                                                                                                                                                                                                                                                                                                                                                                                                                                                                                                                                                                           |                                                           |  |                                                                                                                                                            |  |  |  |  |  |
|                                                                                                                                                            |                                                                                                                                                                         |                                                                                                                                                                                                                                                                                                                                                                                                                                                                                                                                                                                                           |                                                           |  |                                                                                                                                                            |  |  |  |  |  |
|                                                                                                                                                            |                                                                                                                                                                         |                                                                                                                                                                                                                                                                                                                                                                                                                                                                                                                                                                                                           |                                                           |  |                                                                                                                                                            |  |  |  |  |  |
| Time frame: past 36 months                                                                                                                                 |                                                                                                                                                                         |                                                                                                                                                                                                                                                                                                                                                                                                                                                                                                                                                                                                           |                                                           |  |                                                                                                                                                            |  |  |  |  |  |
| 2                                                                                                                                                          | Grants or contracts from any entity (if not indicated in item #1 above).                                                                                                | <input checked="" type="checkbox"/> None<br><br><table border="1" style="width: 100%; border-collapse: collapse;"> <tr> <td style="width: 60%; height: 20px;"> </td> <td style="width: 40%;"> </td> </tr> <tr> <td style="height: 20px;"> </td> <td> </td> </tr> <tr> <td style="height: 20px;"> </td> <td> </td> </tr> </table>                                                                                                                                                                                                                                                                          |                                                           |  |                                                                                                                                                            |  |  |  |  |  |
|                                                                                                                                                            |                                                                                                                                                                         |                                                                                                                                                                                                                                                                                                                                                                                                                                                                                                                                                                                                           |                                                           |  |                                                                                                                                                            |  |  |  |  |  |
|                                                                                                                                                            |                                                                                                                                                                         |                                                                                                                                                                                                                                                                                                                                                                                                                                                                                                                                                                                                           |                                                           |  |                                                                                                                                                            |  |  |  |  |  |
|                                                                                                                                                            |                                                                                                                                                                         |                                                                                                                                                                                                                                                                                                                                                                                                                                                                                                                                                                                                           |                                                           |  |                                                                                                                                                            |  |  |  |  |  |

|           |                                                                                                              | Name all entities with whom you have this relationship or indicate none (add rows as needed) | Specifications/Comments (e.g., if payments were made to you or to your institution)                                                         |  |  |  |  |  |  |  |  |
|-----------|--------------------------------------------------------------------------------------------------------------|----------------------------------------------------------------------------------------------|---------------------------------------------------------------------------------------------------------------------------------------------|--|--|--|--|--|--|--|--|
| <b>3</b>  | Royalties or licenses                                                                                        | <input checked="" type="checkbox"/> <b>None</b>                                              |                                                                                                                                             |  |  |  |  |  |  |  |  |
| <b>4</b>  | Consulting fees                                                                                              | <input checked="" type="checkbox"/> <b>None</b>                                              | <table border="1"> <tr><td></td><td></td></tr> <tr><td></td><td></td></tr> <tr><td></td><td></td></tr> <tr><td></td><td></td></tr> </table> |  |  |  |  |  |  |  |  |
|           |                                                                                                              |                                                                                              |                                                                                                                                             |  |  |  |  |  |  |  |  |
|           |                                                                                                              |                                                                                              |                                                                                                                                             |  |  |  |  |  |  |  |  |
|           |                                                                                                              |                                                                                              |                                                                                                                                             |  |  |  |  |  |  |  |  |
|           |                                                                                                              |                                                                                              |                                                                                                                                             |  |  |  |  |  |  |  |  |
| <b>5</b>  | Payment or honoraria for lectures, presentations, speakers bureaus, manuscript writing or educational events | <input checked="" type="checkbox"/> <b>None</b>                                              |                                                                                                                                             |  |  |  |  |  |  |  |  |
| <b>6</b>  | Payment for expert testimony                                                                                 | <input checked="" type="checkbox"/> <b>None</b>                                              | <table border="1"> <tr><td></td><td></td></tr> <tr><td></td><td></td></tr> <tr><td></td><td></td></tr> </table>                             |  |  |  |  |  |  |  |  |
|           |                                                                                                              |                                                                                              |                                                                                                                                             |  |  |  |  |  |  |  |  |
|           |                                                                                                              |                                                                                              |                                                                                                                                             |  |  |  |  |  |  |  |  |
|           |                                                                                                              |                                                                                              |                                                                                                                                             |  |  |  |  |  |  |  |  |
| <b>7</b>  | Support for attending meetings and/or travel                                                                 | <input checked="" type="checkbox"/> <b>None</b>                                              | <table border="1"> <tr><td></td><td></td></tr> <tr><td></td><td></td></tr> <tr><td></td><td></td></tr> </table>                             |  |  |  |  |  |  |  |  |
|           |                                                                                                              |                                                                                              |                                                                                                                                             |  |  |  |  |  |  |  |  |
|           |                                                                                                              |                                                                                              |                                                                                                                                             |  |  |  |  |  |  |  |  |
|           |                                                                                                              |                                                                                              |                                                                                                                                             |  |  |  |  |  |  |  |  |
| <b>8</b>  | Patents planned, issued or pending                                                                           | <input checked="" type="checkbox"/> <b>None</b>                                              | <table border="1"> <tr><td></td><td></td></tr> <tr><td></td><td></td></tr> <tr><td></td><td></td></tr> </table>                             |  |  |  |  |  |  |  |  |
|           |                                                                                                              |                                                                                              |                                                                                                                                             |  |  |  |  |  |  |  |  |
|           |                                                                                                              |                                                                                              |                                                                                                                                             |  |  |  |  |  |  |  |  |
|           |                                                                                                              |                                                                                              |                                                                                                                                             |  |  |  |  |  |  |  |  |
| <b>9</b>  | Participation on a Data Safety Monitoring Board or Advisory Board                                            | <input checked="" type="checkbox"/> <b>None</b>                                              | <table border="1"> <tr><td></td><td></td></tr> <tr><td></td><td></td></tr> <tr><td></td><td></td></tr> </table>                             |  |  |  |  |  |  |  |  |
|           |                                                                                                              |                                                                                              |                                                                                                                                             |  |  |  |  |  |  |  |  |
|           |                                                                                                              |                                                                                              |                                                                                                                                             |  |  |  |  |  |  |  |  |
|           |                                                                                                              |                                                                                              |                                                                                                                                             |  |  |  |  |  |  |  |  |
| <b>10</b> | Leadership or fiduciary role in other board,                                                                 | <input checked="" type="checkbox"/> <b>None</b>                                              | <table border="1"> <tr><td></td><td></td></tr> </table>                                                                                     |  |  |  |  |  |  |  |  |
|           |                                                                                                              |                                                                                              |                                                                                                                                             |  |  |  |  |  |  |  |  |

|           |                                                                                  | Name all entities with whom you have this relationship or indicate none (add rows as needed)                                                                        | Specifications/Comments (e.g., if payments were made to you or to your institution) |
|-----------|----------------------------------------------------------------------------------|---------------------------------------------------------------------------------------------------------------------------------------------------------------------|-------------------------------------------------------------------------------------|
|           | society, committee or advocacy group, paid or unpaid                             |                                                                                                                                                                     |                                                                                     |
| <b>11</b> | Stock or stock options                                                           | <input type="checkbox"/> <b>None</b><br><input type="checkbox"/> Holds stocks and shares in GlaxoSmithKline<br><input type="checkbox"/><br><input type="checkbox"/> |                                                                                     |
| <b>12</b> | Receipt of equipment, materials, drugs, medical writing, gifts or other services | <input checked="" type="checkbox"/> <b>None</b><br><input type="checkbox"/><br><input type="checkbox"/><br><input type="checkbox"/>                                 |                                                                                     |
| <b>13</b> | Other financial or non-financial interests                                       | <input type="checkbox"/> <b>None</b><br><input type="checkbox"/> Employee of GlaxoSmithKline<br><input type="checkbox"/><br><input type="checkbox"/>                |                                                                                     |

Please place an "X" next to the following statement to indicate your agreement:

I certify that I have answered every question and have not altered the wording of any of the questions on this form.

# ICMJE DISCLOSURE FORM

**Date:** 3/22/2022

**Your Name:** Daniel J Wallace

**Manuscript Title:** Impact of belimumab on organ damage in systemic lupus erythematosus

**Manuscript Number (if known):** ACR-21-0855.R1

In the interest of transparency, we ask you to disclose all relationships/activities/interests listed below that are related to the content of your manuscript. "Related" means any relation with for-profit or not-for-profit third parties whose interests may be affected by the content of the manuscript. Disclosure represents a commitment to transparency and does not necessarily indicate a bias. If you are in doubt about whether to list a relationship/activity/interest, it is preferable that you do so.

The following questions apply to the author's relationships/activities/interests as they relate to the current manuscript only.

The author's relationships/activities/interests should be defined broadly. For example, if your manuscript pertains to the epidemiology of hypertension, you should declare all relationships with manufacturers of antihypertensive medication, even if that medication is not mentioned in the manuscript.

In item #1 below, report all support for the work reported in this manuscript without time limit. For all other items, the time frame for disclosure is the past 36 months.

|                                                                                                                                                            | Name all entities with whom you have this relationship or indicate none (add rows as needed)                                                                            | Specifications/Comments (e.g., if payments were made to you or to your institution)                                                                                                                                                                                                                                                                                                                                                                                                                         |                                                           |  |                                                                                                                                                            |  |  |  |  |  |
|------------------------------------------------------------------------------------------------------------------------------------------------------------|-------------------------------------------------------------------------------------------------------------------------------------------------------------------------|-------------------------------------------------------------------------------------------------------------------------------------------------------------------------------------------------------------------------------------------------------------------------------------------------------------------------------------------------------------------------------------------------------------------------------------------------------------------------------------------------------------|-----------------------------------------------------------|--|------------------------------------------------------------------------------------------------------------------------------------------------------------|--|--|--|--|--|
| Time frame: Since the initial planning of the work                                                                                                         |                                                                                                                                                                         |                                                                                                                                                                                                                                                                                                                                                                                                                                                                                                             |                                                           |  |                                                                                                                                                            |  |  |  |  |  |
| 1                                                                                                                                                          | All support for the present manuscript (e.g., funding, provision of study materials, medical writing, article processing charges, etc.)<br>No time limit for this item. | <input type="checkbox"/> None<br><br><table border="1" style="width: 100%; border-collapse: collapse;"> <tr> <td style="width: 60%;">Funding for this research was provided by GlaxoSmithKline</td> <td style="width: 40%;"></td> </tr> <tr> <td>Medical writing support was provided by Casmira Brazaitis, PhD, of Fishawack Indicia Ltd, UK, part of Fishawack Health, and was funded by GlaxoSmithKline.</td> <td></td> </tr> <tr> <td> </td> <td> </td> </tr> <tr> <td> </td> <td> </td> </tr> </table> | Funding for this research was provided by GlaxoSmithKline |  | Medical writing support was provided by Casmira Brazaitis, PhD, of Fishawack Indicia Ltd, UK, part of Fishawack Health, and was funded by GlaxoSmithKline. |  |  |  |  |  |
| Funding for this research was provided by GlaxoSmithKline                                                                                                  |                                                                                                                                                                         |                                                                                                                                                                                                                                                                                                                                                                                                                                                                                                             |                                                           |  |                                                                                                                                                            |  |  |  |  |  |
| Medical writing support was provided by Casmira Brazaitis, PhD, of Fishawack Indicia Ltd, UK, part of Fishawack Health, and was funded by GlaxoSmithKline. |                                                                                                                                                                         |                                                                                                                                                                                                                                                                                                                                                                                                                                                                                                             |                                                           |  |                                                                                                                                                            |  |  |  |  |  |
|                                                                                                                                                            |                                                                                                                                                                         |                                                                                                                                                                                                                                                                                                                                                                                                                                                                                                             |                                                           |  |                                                                                                                                                            |  |  |  |  |  |
|                                                                                                                                                            |                                                                                                                                                                         |                                                                                                                                                                                                                                                                                                                                                                                                                                                                                                             |                                                           |  |                                                                                                                                                            |  |  |  |  |  |
| Click the tab key to add additional rows.                                                                                                                  |                                                                                                                                                                         |                                                                                                                                                                                                                                                                                                                                                                                                                                                                                                             |                                                           |  |                                                                                                                                                            |  |  |  |  |  |
| Time frame: past 36 months                                                                                                                                 |                                                                                                                                                                         |                                                                                                                                                                                                                                                                                                                                                                                                                                                                                                             |                                                           |  |                                                                                                                                                            |  |  |  |  |  |
| 2                                                                                                                                                          | Grants or contracts from any entity (if not indicated in item #1 above).                                                                                                | <input checked="" type="checkbox"/> <b>None</b><br><br><table border="1" style="width: 100%; border-collapse: collapse;"> <tr><td> </td><td> </td></tr> <tr><td> </td><td> </td></tr> <tr><td> </td><td> </td></tr> </table>                                                                                                                                                                                                                                                                                |                                                           |  |                                                                                                                                                            |  |  |  |  |  |
|                                                                                                                                                            |                                                                                                                                                                         |                                                                                                                                                                                                                                                                                                                                                                                                                                                                                                             |                                                           |  |                                                                                                                                                            |  |  |  |  |  |
|                                                                                                                                                            |                                                                                                                                                                         |                                                                                                                                                                                                                                                                                                                                                                                                                                                                                                             |                                                           |  |                                                                                                                                                            |  |  |  |  |  |
|                                                                                                                                                            |                                                                                                                                                                         |                                                                                                                                                                                                                                                                                                                                                                                                                                                                                                             |                                                           |  |                                                                                                                                                            |  |  |  |  |  |



|    |                                                                                                              | Name all entities with whom you have this relationship or indicate none (add rows as needed) | Specifications/Comments (e.g., if payments were made to you or to your institution) |
|----|--------------------------------------------------------------------------------------------------------------|----------------------------------------------------------------------------------------------|-------------------------------------------------------------------------------------|
| 3  | Royalties or licenses                                                                                        | <input checked="" type="checkbox"/> None                                                     |                                                                                     |
| 4  | Consulting fees                                                                                              | <input type="checkbox"/> None                                                                |                                                                                     |
|    |                                                                                                              | Consultant for GSK                                                                           |                                                                                     |
|    |                                                                                                              |                                                                                              |                                                                                     |
|    |                                                                                                              |                                                                                              |                                                                                     |
| 5  | Payment or honoraria for lectures, presentations, speakers bureaus, manuscript writing or educational events | <input type="checkbox"/> None                                                                |                                                                                     |
|    |                                                                                                              | Speaker's bureau member for GSK                                                              |                                                                                     |
|    |                                                                                                              |                                                                                              |                                                                                     |
|    |                                                                                                              |                                                                                              |                                                                                     |
| 6  | Payment for expert testimony                                                                                 | <input checked="" type="checkbox"/> None                                                     |                                                                                     |
|    |                                                                                                              |                                                                                              |                                                                                     |
|    |                                                                                                              |                                                                                              |                                                                                     |
|    |                                                                                                              |                                                                                              |                                                                                     |
| 7  | Support for attending meetings and/or travel                                                                 | <input checked="" type="checkbox"/> None                                                     |                                                                                     |
|    |                                                                                                              |                                                                                              |                                                                                     |
|    |                                                                                                              |                                                                                              |                                                                                     |
|    |                                                                                                              |                                                                                              |                                                                                     |
| 8  | Patents planned, issued or pending                                                                           | <input checked="" type="checkbox"/> None                                                     |                                                                                     |
|    |                                                                                                              |                                                                                              |                                                                                     |
|    |                                                                                                              |                                                                                              |                                                                                     |
|    |                                                                                                              |                                                                                              |                                                                                     |
| 9  | Participation on a Data Safety Monitoring Board or Advisory Board                                            | <input checked="" type="checkbox"/> None                                                     |                                                                                     |
|    |                                                                                                              |                                                                                              |                                                                                     |
|    |                                                                                                              |                                                                                              |                                                                                     |
|    |                                                                                                              |                                                                                              |                                                                                     |
| 10 | Leadership or fiduciary role in other board,                                                                 | <input checked="" type="checkbox"/> None                                                     |                                                                                     |
|    |                                                                                                              |                                                                                              |                                                                                     |

|           |                                                                                  | Name all entities with whom you have this relationship or indicate none (add rows as needed) | Specifications/Comments (e.g., if payments were made to you or to your institution) |
|-----------|----------------------------------------------------------------------------------|----------------------------------------------------------------------------------------------|-------------------------------------------------------------------------------------|
|           | society, committee or advocacy group, paid or unpaid                             |                                                                                              |                                                                                     |
| <b>11</b> | Stock or stock options                                                           | <input checked="" type="checkbox"/> <b>None</b>                                              |                                                                                     |
|           |                                                                                  |                                                                                              |                                                                                     |
|           |                                                                                  |                                                                                              |                                                                                     |
| <b>12</b> | Receipt of equipment, materials, drugs, medical writing, gifts or other services | <input checked="" type="checkbox"/> <b>None</b>                                              |                                                                                     |
|           |                                                                                  |                                                                                              |                                                                                     |
|           |                                                                                  |                                                                                              |                                                                                     |
| <b>13</b> | Other financial or non-financial interests                                       | <input checked="" type="checkbox"/> <b>None</b>                                              |                                                                                     |
|           |                                                                                  |                                                                                              |                                                                                     |
|           |                                                                                  |                                                                                              |                                                                                     |

Please place an "X" next to the following statement to indicate your agreement:

I certify that I have answered every question and have not altered the wording of any of the questions on this form.

## ICMJE DISCLOSURE FORM

**Date:** 3/22/2022

**Your Name:** Ellen M. Ginzler

**Manuscript Title:** Impact of belimumab on organ damage in systemic lupus erythematosus

**Manuscript Number (if known):** ACR-21-0855.R1

In the interest of transparency, we ask you to disclose all relationships/activities/interests listed below that are related to the content of your manuscript. "Related" means any relation with for-profit or not-for-profit third parties whose interests may be affected by the content of the manuscript. Disclosure represents a commitment to transparency and does not necessarily indicate a bias. If you are in doubt about whether to list a relationship/activity/interest, it is preferable that you do so.

The following questions apply to the author's relationships/activities/interests as they relate to the current manuscript only.

The author's relationships/activities/interests should be defined broadly. For example, if your manuscript pertains to the epidemiology of hypertension, you should declare all relationships with manufacturers of antihypertensive medication, even if that medication is not mentioned in the manuscript.

In item #1 below, report all support for the work reported in this manuscript without time limit. For all other items, the time frame for disclosure is the past 36 months.

|                                                                                                                                                            | Name all entities with whom you have this relationship or indicate none (add rows as needed)                                                                            | Specifications/Comments (e.g., if payments were made to you or to your institution)                                                                                                                                                                                                                                                                                                                                                                                                                                                                                                                                            |                                                           |  |                                                                                                                                                            |  |  |  |  |  |
|------------------------------------------------------------------------------------------------------------------------------------------------------------|-------------------------------------------------------------------------------------------------------------------------------------------------------------------------|--------------------------------------------------------------------------------------------------------------------------------------------------------------------------------------------------------------------------------------------------------------------------------------------------------------------------------------------------------------------------------------------------------------------------------------------------------------------------------------------------------------------------------------------------------------------------------------------------------------------------------|-----------------------------------------------------------|--|------------------------------------------------------------------------------------------------------------------------------------------------------------|--|--|--|--|--|
| Time frame: Since the initial planning of the work                                                                                                         |                                                                                                                                                                         |                                                                                                                                                                                                                                                                                                                                                                                                                                                                                                                                                                                                                                |                                                           |  |                                                                                                                                                            |  |  |  |  |  |
| 1                                                                                                                                                          | All support for the present manuscript (e.g., funding, provision of study materials, medical writing, article processing charges, etc.)<br>No time limit for this item. | <input type="checkbox"/> None<br><br><table border="1" style="width: 100%; border-collapse: collapse;"> <tr> <td style="width: 60%;">Funding for this research was provided by GlaxoSmithKline</td> <td style="width: 40%;"></td> </tr> <tr> <td>Medical writing support was provided by Casmira Brazaitis, PhD, of Fishawack Indicia Ltd, UK, part of Fishawack Health, and was funded by GlaxoSmithKline.</td> <td></td> </tr> <tr> <td> </td> <td> </td> </tr> <tr> <td> </td> <td> </td> </tr> </table> <div style="text-align: right; font-size: small; margin-top: 5px;">Click the tab key to add additional rows.</div> | Funding for this research was provided by GlaxoSmithKline |  | Medical writing support was provided by Casmira Brazaitis, PhD, of Fishawack Indicia Ltd, UK, part of Fishawack Health, and was funded by GlaxoSmithKline. |  |  |  |  |  |
| Funding for this research was provided by GlaxoSmithKline                                                                                                  |                                                                                                                                                                         |                                                                                                                                                                                                                                                                                                                                                                                                                                                                                                                                                                                                                                |                                                           |  |                                                                                                                                                            |  |  |  |  |  |
| Medical writing support was provided by Casmira Brazaitis, PhD, of Fishawack Indicia Ltd, UK, part of Fishawack Health, and was funded by GlaxoSmithKline. |                                                                                                                                                                         |                                                                                                                                                                                                                                                                                                                                                                                                                                                                                                                                                                                                                                |                                                           |  |                                                                                                                                                            |  |  |  |  |  |
|                                                                                                                                                            |                                                                                                                                                                         |                                                                                                                                                                                                                                                                                                                                                                                                                                                                                                                                                                                                                                |                                                           |  |                                                                                                                                                            |  |  |  |  |  |
|                                                                                                                                                            |                                                                                                                                                                         |                                                                                                                                                                                                                                                                                                                                                                                                                                                                                                                                                                                                                                |                                                           |  |                                                                                                                                                            |  |  |  |  |  |
| Time frame: past 36 months                                                                                                                                 |                                                                                                                                                                         |                                                                                                                                                                                                                                                                                                                                                                                                                                                                                                                                                                                                                                |                                                           |  |                                                                                                                                                            |  |  |  |  |  |
| 2                                                                                                                                                          | Grants or contracts from any entity (if not indicated in item #1 above).                                                                                                | <input checked="" type="checkbox"/> <b>None</b><br><br><table border="1" style="width: 100%; border-collapse: collapse;"> <tr><td> </td><td> </td></tr> <tr><td> </td><td> </td></tr> <tr><td> </td><td> </td></tr> </table>                                                                                                                                                                                                                                                                                                                                                                                                   |                                                           |  |                                                                                                                                                            |  |  |  |  |  |
|                                                                                                                                                            |                                                                                                                                                                         |                                                                                                                                                                                                                                                                                                                                                                                                                                                                                                                                                                                                                                |                                                           |  |                                                                                                                                                            |  |  |  |  |  |
|                                                                                                                                                            |                                                                                                                                                                         |                                                                                                                                                                                                                                                                                                                                                                                                                                                                                                                                                                                                                                |                                                           |  |                                                                                                                                                            |  |  |  |  |  |
|                                                                                                                                                            |                                                                                                                                                                         |                                                                                                                                                                                                                                                                                                                                                                                                                                                                                                                                                                                                                                |                                                           |  |                                                                                                                                                            |  |  |  |  |  |

|    |                                                                                                              | Name all entities with whom you have this relationship or indicate none (add rows as needed) | Specifications/Comments (e.g., if payments were made to you or to your institution) |
|----|--------------------------------------------------------------------------------------------------------------|----------------------------------------------------------------------------------------------|-------------------------------------------------------------------------------------|
| 3  | Royalties or licenses                                                                                        | <input checked="" type="checkbox"/> None                                                     |                                                                                     |
| 4  | Consulting fees                                                                                              | <input type="checkbox"/> None                                                                |                                                                                     |
|    |                                                                                                              | Consultant for AbbVie                                                                        |                                                                                     |
|    |                                                                                                              |                                                                                              |                                                                                     |
|    |                                                                                                              |                                                                                              |                                                                                     |
| 5  | Payment or honoraria for lectures, presentations, speakers bureaus, manuscript writing or educational events | <input checked="" type="checkbox"/> None                                                     |                                                                                     |
| 6  | Payment for expert testimony                                                                                 | <input checked="" type="checkbox"/> None                                                     |                                                                                     |
|    |                                                                                                              |                                                                                              |                                                                                     |
|    |                                                                                                              |                                                                                              |                                                                                     |
| 7  | Support for attending meetings and/or travel                                                                 | <input checked="" type="checkbox"/> None                                                     |                                                                                     |
|    |                                                                                                              |                                                                                              |                                                                                     |
|    |                                                                                                              |                                                                                              |                                                                                     |
| 8  | Patents planned, issued or pending                                                                           | <input checked="" type="checkbox"/> None                                                     |                                                                                     |
|    |                                                                                                              |                                                                                              |                                                                                     |
|    |                                                                                                              |                                                                                              |                                                                                     |
| 9  | Participation on a Data Safety Monitoring Board or Advisory Board                                            | <input checked="" type="checkbox"/> None                                                     |                                                                                     |
|    |                                                                                                              |                                                                                              |                                                                                     |
|    |                                                                                                              |                                                                                              |                                                                                     |
| 10 | Leadership or fiduciary role in other board,                                                                 | <input checked="" type="checkbox"/> None                                                     |                                                                                     |
|    |                                                                                                              |                                                                                              |                                                                                     |

|           |                                                                                  | Name all entities with whom you have this relationship or indicate none (add rows as needed) | Specifications/Comments (e.g., if payments were made to you or to your institution) |
|-----------|----------------------------------------------------------------------------------|----------------------------------------------------------------------------------------------|-------------------------------------------------------------------------------------|
|           | society, committee or advocacy group, paid or unpaid                             |                                                                                              |                                                                                     |
| <b>11</b> | Stock or stock options                                                           | <input checked="" type="checkbox"/> <b>None</b>                                              |                                                                                     |
|           |                                                                                  |                                                                                              |                                                                                     |
|           |                                                                                  |                                                                                              |                                                                                     |
| <b>12</b> | Receipt of equipment, materials, drugs, medical writing, gifts or other services | <input checked="" type="checkbox"/> <b>None</b>                                              |                                                                                     |
|           |                                                                                  |                                                                                              |                                                                                     |
|           |                                                                                  |                                                                                              |                                                                                     |
| <b>13</b> | Other financial or non-financial interests                                       | <input type="checkbox"/> <b>None</b>                                                         |                                                                                     |
|           |                                                                                  | Received research funding from Aurinia, Genentech, GSK                                       |                                                                                     |
|           |                                                                                  |                                                                                              |                                                                                     |
|           |                                                                                  |                                                                                              |                                                                                     |

**Please place an "X" next to the following statement to indicate your agreement:**

I certify that I have answered every question and have not altered the wording of any of the questions on this form.

## ICMJE DISCLOSURE FORM

**Date:** 3/22/2022

**Your Name:** Holly Quasny

**Manuscript Title:** Impact of belimumab on organ damage in systemic lupus erythematosus

**Manuscript Number (if known):** ACR-21-0855.R1

In the interest of transparency, we ask you to disclose all relationships/activities/interests listed below that are related to the content of your manuscript. "Related" means any relation with for-profit or not-for-profit third parties whose interests may be affected by the content of the manuscript. Disclosure represents a commitment to transparency and does not necessarily indicate a bias. If you are in doubt about whether to list a relationship/activity/interest, it is preferable that you do so.

The following questions apply to the author's relationships/activities/interests as they relate to the current manuscript only.

The author's relationships/activities/interests should be defined broadly. For example, if your manuscript pertains to the epidemiology of hypertension, you should declare all relationships with manufacturers of antihypertensive medication, even if that medication is not mentioned in the manuscript.

In item #1 below, report all support for the work reported in this manuscript without time limit. For all other items, the time frame for disclosure is the past 36 months.

|                                                                                                                                                            | Name all entities with whom you have this relationship or indicate none (add rows as needed)                                                                            | Specifications/Comments (e.g., if payments were made to you or to your institution)                                                                                                                                                                                                                                                                                                                                                                                                                                                                                                                                            |                                                           |  |                                                                                                                                                            |  |  |  |  |  |
|------------------------------------------------------------------------------------------------------------------------------------------------------------|-------------------------------------------------------------------------------------------------------------------------------------------------------------------------|--------------------------------------------------------------------------------------------------------------------------------------------------------------------------------------------------------------------------------------------------------------------------------------------------------------------------------------------------------------------------------------------------------------------------------------------------------------------------------------------------------------------------------------------------------------------------------------------------------------------------------|-----------------------------------------------------------|--|------------------------------------------------------------------------------------------------------------------------------------------------------------|--|--|--|--|--|
| Time frame: Since the initial planning of the work                                                                                                         |                                                                                                                                                                         |                                                                                                                                                                                                                                                                                                                                                                                                                                                                                                                                                                                                                                |                                                           |  |                                                                                                                                                            |  |  |  |  |  |
| 1                                                                                                                                                          | All support for the present manuscript (e.g., funding, provision of study materials, medical writing, article processing charges, etc.)<br>No time limit for this item. | <input type="checkbox"/> None<br><br><table border="1" style="width: 100%; border-collapse: collapse;"> <tr> <td style="width: 60%;">Funding for this research was provided by GlaxoSmithKline</td> <td style="width: 40%;"></td> </tr> <tr> <td>Medical writing support was provided by Casmira Brazaitis, PhD, of Fishawack Indicia Ltd, UK, part of Fishawack Health, and was funded by GlaxoSmithKline.</td> <td></td> </tr> <tr> <td> </td> <td> </td> </tr> <tr> <td> </td> <td> </td> </tr> </table> <div style="text-align: right; font-size: small; margin-top: 5px;">Click the tab key to add additional rows.</div> | Funding for this research was provided by GlaxoSmithKline |  | Medical writing support was provided by Casmira Brazaitis, PhD, of Fishawack Indicia Ltd, UK, part of Fishawack Health, and was funded by GlaxoSmithKline. |  |  |  |  |  |
| Funding for this research was provided by GlaxoSmithKline                                                                                                  |                                                                                                                                                                         |                                                                                                                                                                                                                                                                                                                                                                                                                                                                                                                                                                                                                                |                                                           |  |                                                                                                                                                            |  |  |  |  |  |
| Medical writing support was provided by Casmira Brazaitis, PhD, of Fishawack Indicia Ltd, UK, part of Fishawack Health, and was funded by GlaxoSmithKline. |                                                                                                                                                                         |                                                                                                                                                                                                                                                                                                                                                                                                                                                                                                                                                                                                                                |                                                           |  |                                                                                                                                                            |  |  |  |  |  |
|                                                                                                                                                            |                                                                                                                                                                         |                                                                                                                                                                                                                                                                                                                                                                                                                                                                                                                                                                                                                                |                                                           |  |                                                                                                                                                            |  |  |  |  |  |
|                                                                                                                                                            |                                                                                                                                                                         |                                                                                                                                                                                                                                                                                                                                                                                                                                                                                                                                                                                                                                |                                                           |  |                                                                                                                                                            |  |  |  |  |  |
| Time frame: past 36 months                                                                                                                                 |                                                                                                                                                                         |                                                                                                                                                                                                                                                                                                                                                                                                                                                                                                                                                                                                                                |                                                           |  |                                                                                                                                                            |  |  |  |  |  |
| 2                                                                                                                                                          | Grants or contracts from any entity (if not indicated in item #1 above).                                                                                                | <input checked="" type="checkbox"/> None<br><br><table border="1" style="width: 100%; border-collapse: collapse;"> <tr> <td style="width: 60%; height: 20px;"> </td> <td style="width: 40%;"> </td> </tr> <tr> <td style="height: 20px;"> </td> <td> </td> </tr> <tr> <td style="height: 20px;"> </td> <td> </td> </tr> </table>                                                                                                                                                                                                                                                                                               |                                                           |  |                                                                                                                                                            |  |  |  |  |  |
|                                                                                                                                                            |                                                                                                                                                                         |                                                                                                                                                                                                                                                                                                                                                                                                                                                                                                                                                                                                                                |                                                           |  |                                                                                                                                                            |  |  |  |  |  |
|                                                                                                                                                            |                                                                                                                                                                         |                                                                                                                                                                                                                                                                                                                                                                                                                                                                                                                                                                                                                                |                                                           |  |                                                                                                                                                            |  |  |  |  |  |
|                                                                                                                                                            |                                                                                                                                                                         |                                                                                                                                                                                                                                                                                                                                                                                                                                                                                                                                                                                                                                |                                                           |  |                                                                                                                                                            |  |  |  |  |  |

|    |                                                                                                              | Name all entities with whom you have this relationship or indicate none (add rows as needed) | Specifications/Comments (e.g., if payments were made to you or to your institution)                             |  |  |  |  |  |  |
|----|--------------------------------------------------------------------------------------------------------------|----------------------------------------------------------------------------------------------|-----------------------------------------------------------------------------------------------------------------|--|--|--|--|--|--|
| 3  | Royalties or licenses                                                                                        | <input checked="" type="checkbox"/> None                                                     |                                                                                                                 |  |  |  |  |  |  |
| 4  | Consulting fees                                                                                              | <input checked="" type="checkbox"/> None                                                     | <table border="1"> <tr><td></td><td></td></tr> <tr><td></td><td></td></tr> <tr><td></td><td></td></tr> </table> |  |  |  |  |  |  |
|    |                                                                                                              |                                                                                              |                                                                                                                 |  |  |  |  |  |  |
|    |                                                                                                              |                                                                                              |                                                                                                                 |  |  |  |  |  |  |
|    |                                                                                                              |                                                                                              |                                                                                                                 |  |  |  |  |  |  |
| 5  | Payment or honoraria for lectures, presentations, speakers bureaus, manuscript writing or educational events | <input checked="" type="checkbox"/> None                                                     |                                                                                                                 |  |  |  |  |  |  |
| 6  | Payment for expert testimony                                                                                 | <input checked="" type="checkbox"/> None                                                     | <table border="1"> <tr><td></td><td></td></tr> <tr><td></td><td></td></tr> <tr><td></td><td></td></tr> </table> |  |  |  |  |  |  |
|    |                                                                                                              |                                                                                              |                                                                                                                 |  |  |  |  |  |  |
|    |                                                                                                              |                                                                                              |                                                                                                                 |  |  |  |  |  |  |
|    |                                                                                                              |                                                                                              |                                                                                                                 |  |  |  |  |  |  |
| 7  | Support for attending meetings and/or travel                                                                 | <input checked="" type="checkbox"/> None                                                     | <table border="1"> <tr><td></td><td></td></tr> <tr><td></td><td></td></tr> <tr><td></td><td></td></tr> </table> |  |  |  |  |  |  |
|    |                                                                                                              |                                                                                              |                                                                                                                 |  |  |  |  |  |  |
|    |                                                                                                              |                                                                                              |                                                                                                                 |  |  |  |  |  |  |
|    |                                                                                                              |                                                                                              |                                                                                                                 |  |  |  |  |  |  |
| 8  | Patents planned, issued or pending                                                                           | <input checked="" type="checkbox"/> None                                                     | <table border="1"> <tr><td></td><td></td></tr> <tr><td></td><td></td></tr> <tr><td></td><td></td></tr> </table> |  |  |  |  |  |  |
|    |                                                                                                              |                                                                                              |                                                                                                                 |  |  |  |  |  |  |
|    |                                                                                                              |                                                                                              |                                                                                                                 |  |  |  |  |  |  |
|    |                                                                                                              |                                                                                              |                                                                                                                 |  |  |  |  |  |  |
| 9  | Participation on a Data Safety Monitoring Board or Advisory Board                                            | <input checked="" type="checkbox"/> None                                                     | <table border="1"> <tr><td></td><td></td></tr> <tr><td></td><td></td></tr> <tr><td></td><td></td></tr> </table> |  |  |  |  |  |  |
|    |                                                                                                              |                                                                                              |                                                                                                                 |  |  |  |  |  |  |
|    |                                                                                                              |                                                                                              |                                                                                                                 |  |  |  |  |  |  |
|    |                                                                                                              |                                                                                              |                                                                                                                 |  |  |  |  |  |  |
| 10 | Leadership or fiduciary role in other board,                                                                 | <input checked="" type="checkbox"/> None                                                     | <table border="1"> <tr><td></td><td></td></tr> </table>                                                         |  |  |  |  |  |  |
|    |                                                                                                              |                                                                                              |                                                                                                                 |  |  |  |  |  |  |

|           |                                                                                  | Name all entities with whom you have this relationship or indicate none (add rows as needed)                                                                        | Specifications/Comments (e.g., if payments were made to you or to your institution) |
|-----------|----------------------------------------------------------------------------------|---------------------------------------------------------------------------------------------------------------------------------------------------------------------|-------------------------------------------------------------------------------------|
|           | society, committee or advocacy group, paid or unpaid                             |                                                                                                                                                                     |                                                                                     |
| <b>11</b> | Stock or stock options                                                           | <input type="checkbox"/> <b>None</b><br><input type="checkbox"/> Holds stocks and shares in GlaxoSmithKline<br><input type="checkbox"/><br><input type="checkbox"/> |                                                                                     |
| <b>12</b> | Receipt of equipment, materials, drugs, medical writing, gifts or other services | <input checked="" type="checkbox"/> <b>None</b><br><input type="checkbox"/><br><input type="checkbox"/><br><input type="checkbox"/>                                 |                                                                                     |
| <b>13</b> | Other financial or non-financial interests                                       | <input type="checkbox"/> <b>None</b><br><input type="checkbox"/> Employee of GlaxoSmithKline<br><input type="checkbox"/><br><input type="checkbox"/>                |                                                                                     |

Please place an "X" next to the following statement to indicate your agreement:

I certify that I have answered every question and have not altered the wording of any of the questions on this form.



## ICMJE DISCLOSURE FORM

**Date:** 3/22/2022

**Your Name:** Ian N. Bruce

**Manuscript Title:** Impact of belimumab on organ damage in systemic lupus erythematosus

**Manuscript Number (if known):** ACR-21-0855.R1

In the interest of transparency, we ask you to disclose all relationships/activities/interests listed below that are related to the content of your manuscript. "Related" means any relation with for-profit or not-for-profit third parties whose interests may be affected by the content of the manuscript. Disclosure represents a commitment to transparency and does not necessarily indicate a bias. If you are in doubt about whether to list a relationship/activity/interest, it is preferable that you do so.

The following questions apply to the author's relationships/activities/interests as they relate to the current manuscript only.

The author's relationships/activities/interests should be defined broadly. For example, if your manuscript pertains to the epidemiology of hypertension, you should declare all relationships with manufacturers of antihypertensive medication, even if that medication is not mentioned in the manuscript.

In item #1 below, report all support for the work reported in this manuscript without time limit. For all other items, the time frame for disclosure is the past 36 months.

|                                                                                                                                                            | Name all entities with whom you have this relationship or indicate none (add rows as needed)                                                                            | Specifications/Comments (e.g., if payments were made to you or to your institution)                                                                                                                                                                                                                                                                                                                                                                                                                                                                                                                      |                                                           |  |                                                                                                                                                            |  |  |  |  |  |
|------------------------------------------------------------------------------------------------------------------------------------------------------------|-------------------------------------------------------------------------------------------------------------------------------------------------------------------------|----------------------------------------------------------------------------------------------------------------------------------------------------------------------------------------------------------------------------------------------------------------------------------------------------------------------------------------------------------------------------------------------------------------------------------------------------------------------------------------------------------------------------------------------------------------------------------------------------------|-----------------------------------------------------------|--|------------------------------------------------------------------------------------------------------------------------------------------------------------|--|--|--|--|--|
| Time frame: Since the initial planning of the work                                                                                                         |                                                                                                                                                                         |                                                                                                                                                                                                                                                                                                                                                                                                                                                                                                                                                                                                          |                                                           |  |                                                                                                                                                            |  |  |  |  |  |
| 1                                                                                                                                                          | All support for the present manuscript (e.g., funding, provision of study materials, medical writing, article processing charges, etc.)<br>No time limit for this item. | <input type="checkbox"/> None <table border="1" style="width: 100%; margin-top: 10px;"> <tr> <td style="width: 60%;">Funding for this research was provided by GlaxoSmithKline</td> <td style="width: 40%;"></td> </tr> <tr> <td>Medical writing support was provided by Casmira Brazaitis, PhD, of Fishawack Indicia Ltd, UK, part of Fishawack Health, and was funded by GlaxoSmithKline.</td> <td></td> </tr> <tr> <td> </td> <td></td> </tr> <tr> <td> </td> <td></td> </tr> </table> <p style="text-align: right; font-size: small; margin-top: 5px;">Click the tab key to add additional rows.</p> | Funding for this research was provided by GlaxoSmithKline |  | Medical writing support was provided by Casmira Brazaitis, PhD, of Fishawack Indicia Ltd, UK, part of Fishawack Health, and was funded by GlaxoSmithKline. |  |  |  |  |  |
| Funding for this research was provided by GlaxoSmithKline                                                                                                  |                                                                                                                                                                         |                                                                                                                                                                                                                                                                                                                                                                                                                                                                                                                                                                                                          |                                                           |  |                                                                                                                                                            |  |  |  |  |  |
| Medical writing support was provided by Casmira Brazaitis, PhD, of Fishawack Indicia Ltd, UK, part of Fishawack Health, and was funded by GlaxoSmithKline. |                                                                                                                                                                         |                                                                                                                                                                                                                                                                                                                                                                                                                                                                                                                                                                                                          |                                                           |  |                                                                                                                                                            |  |  |  |  |  |
|                                                                                                                                                            |                                                                                                                                                                         |                                                                                                                                                                                                                                                                                                                                                                                                                                                                                                                                                                                                          |                                                           |  |                                                                                                                                                            |  |  |  |  |  |
|                                                                                                                                                            |                                                                                                                                                                         |                                                                                                                                                                                                                                                                                                                                                                                                                                                                                                                                                                                                          |                                                           |  |                                                                                                                                                            |  |  |  |  |  |
| Time frame: past 36 months                                                                                                                                 |                                                                                                                                                                         |                                                                                                                                                                                                                                                                                                                                                                                                                                                                                                                                                                                                          |                                                           |  |                                                                                                                                                            |  |  |  |  |  |
| 2                                                                                                                                                          | Grants or contracts from any entity (if not indicated in item #1 above).                                                                                                | <input type="checkbox"/> None <table border="1" style="width: 100%; margin-top: 10px;"> <tr> <td style="width: 60%;">Received research grants from GSK and Sanofi Genzyme</td> <td style="width: 40%;"></td> </tr> <tr> <td>A National Institute for Health Research (NIHR) Senior Investigator Emeritus and is funded by the NIHR Manchester Biomedical Research Centre.</td> <td></td> </tr> <tr> <td> </td> <td></td> </tr> <tr> <td> </td> <td></td> </tr> </table>                                                                                                                                  | Received research grants from GSK and Sanofi Genzyme      |  | A National Institute for Health Research (NIHR) Senior Investigator Emeritus and is funded by the NIHR Manchester Biomedical Research Centre.              |  |  |  |  |  |
| Received research grants from GSK and Sanofi Genzyme                                                                                                       |                                                                                                                                                                         |                                                                                                                                                                                                                                                                                                                                                                                                                                                                                                                                                                                                          |                                                           |  |                                                                                                                                                            |  |  |  |  |  |
| A National Institute for Health Research (NIHR) Senior Investigator Emeritus and is funded by the NIHR Manchester Biomedical Research Centre.              |                                                                                                                                                                         |                                                                                                                                                                                                                                                                                                                                                                                                                                                                                                                                                                                                          |                                                           |  |                                                                                                                                                            |  |  |  |  |  |
|                                                                                                                                                            |                                                                                                                                                                         |                                                                                                                                                                                                                                                                                                                                                                                                                                                                                                                                                                                                          |                                                           |  |                                                                                                                                                            |  |  |  |  |  |
|                                                                                                                                                            |                                                                                                                                                                         |                                                                                                                                                                                                                                                                                                                                                                                                                                                                                                                                                                                                          |                                                           |  |                                                                                                                                                            |  |  |  |  |  |

|    |                                                                                                              | Name all entities with whom you have this relationship or indicate none (add rows as needed) | Specifications/Comments (e.g., if payments were made to you or to your institution) |
|----|--------------------------------------------------------------------------------------------------------------|----------------------------------------------------------------------------------------------|-------------------------------------------------------------------------------------|
| 3  | Royalties or licenses                                                                                        | <input checked="" type="checkbox"/> None                                                     |                                                                                     |
| 4  | Consulting fees                                                                                              | <input type="checkbox"/> None                                                                |                                                                                     |
|    |                                                                                                              | Consultant for AstraZeneca, Aurinia, Eli Lilly, GSK, ILTOO and UCB                           |                                                                                     |
|    |                                                                                                              |                                                                                              |                                                                                     |
|    |                                                                                                              |                                                                                              |                                                                                     |
| 5  | Payment or honoraria for lectures, presentations, speakers bureaus, manuscript writing or educational events | <input type="checkbox"/> None                                                                |                                                                                     |
|    |                                                                                                              | Speaker's bureau member for AstraZeneca, Aurinia, Eli Lilly, GSK, ILTOO and UCB              |                                                                                     |
|    |                                                                                                              |                                                                                              |                                                                                     |
|    |                                                                                                              |                                                                                              |                                                                                     |
| 6  | Payment for expert testimony                                                                                 | <input checked="" type="checkbox"/> None                                                     |                                                                                     |
|    |                                                                                                              |                                                                                              |                                                                                     |
|    |                                                                                                              |                                                                                              |                                                                                     |
|    |                                                                                                              |                                                                                              |                                                                                     |
| 7  | Support for attending meetings and/or travel                                                                 | <input checked="" type="checkbox"/> None                                                     |                                                                                     |
|    |                                                                                                              |                                                                                              |                                                                                     |
|    |                                                                                                              |                                                                                              |                                                                                     |
|    |                                                                                                              |                                                                                              |                                                                                     |
| 8  | Patents planned, issued or pending                                                                           | <input checked="" type="checkbox"/> None                                                     |                                                                                     |
|    |                                                                                                              |                                                                                              |                                                                                     |
|    |                                                                                                              |                                                                                              |                                                                                     |
|    |                                                                                                              |                                                                                              |                                                                                     |
| 9  | Participation on a Data Safety Monitoring Board or Advisory Board                                            | <input checked="" type="checkbox"/> None                                                     |                                                                                     |
|    |                                                                                                              |                                                                                              |                                                                                     |
|    |                                                                                                              |                                                                                              |                                                                                     |
|    |                                                                                                              |                                                                                              |                                                                                     |
| 10 | Leadership or fiduciary role in                                                                              | <input checked="" type="checkbox"/> None                                                     |                                                                                     |

|           |                                                                                  | Name all entities with whom you have this relationship or indicate none (add rows as needed)                                                                             | Specifications/Comments (e.g., if payments were made to you or to your institution) |  |  |  |  |  |                                                                                                                       |  |  |  |  |  |  |
|-----------|----------------------------------------------------------------------------------|--------------------------------------------------------------------------------------------------------------------------------------------------------------------------|-------------------------------------------------------------------------------------|--|--|--|--|--|-----------------------------------------------------------------------------------------------------------------------|--|--|--|--|--|--|
|           | other board, society, committee or advocacy group, paid or unpaid                | <table border="1"> <tr><td> </td><td> </td></tr> <tr><td> </td><td> </td></tr> <tr><td> </td><td> </td></tr> </table>                                                    |                                                                                     |  |  |  |  |  | <table border="1"> <tr><td> </td><td> </td></tr> <tr><td> </td><td> </td></tr> <tr><td> </td><td> </td></tr> </table> |  |  |  |  |  |  |
|           |                                                                                  |                                                                                                                                                                          |                                                                                     |  |  |  |  |  |                                                                                                                       |  |  |  |  |  |  |
|           |                                                                                  |                                                                                                                                                                          |                                                                                     |  |  |  |  |  |                                                                                                                       |  |  |  |  |  |  |
|           |                                                                                  |                                                                                                                                                                          |                                                                                     |  |  |  |  |  |                                                                                                                       |  |  |  |  |  |  |
|           |                                                                                  |                                                                                                                                                                          |                                                                                     |  |  |  |  |  |                                                                                                                       |  |  |  |  |  |  |
|           |                                                                                  |                                                                                                                                                                          |                                                                                     |  |  |  |  |  |                                                                                                                       |  |  |  |  |  |  |
|           |                                                                                  |                                                                                                                                                                          |                                                                                     |  |  |  |  |  |                                                                                                                       |  |  |  |  |  |  |
| <b>11</b> | Stock or stock options                                                           | <input checked="" type="checkbox"/> <b>None</b><br><table border="1"> <tr><td> </td><td> </td></tr> <tr><td> </td><td> </td></tr> <tr><td> </td><td> </td></tr> </table> |                                                                                     |  |  |  |  |  | <table border="1"> <tr><td> </td><td> </td></tr> <tr><td> </td><td> </td></tr> <tr><td> </td><td> </td></tr> </table> |  |  |  |  |  |  |
|           |                                                                                  |                                                                                                                                                                          |                                                                                     |  |  |  |  |  |                                                                                                                       |  |  |  |  |  |  |
|           |                                                                                  |                                                                                                                                                                          |                                                                                     |  |  |  |  |  |                                                                                                                       |  |  |  |  |  |  |
|           |                                                                                  |                                                                                                                                                                          |                                                                                     |  |  |  |  |  |                                                                                                                       |  |  |  |  |  |  |
|           |                                                                                  |                                                                                                                                                                          |                                                                                     |  |  |  |  |  |                                                                                                                       |  |  |  |  |  |  |
|           |                                                                                  |                                                                                                                                                                          |                                                                                     |  |  |  |  |  |                                                                                                                       |  |  |  |  |  |  |
|           |                                                                                  |                                                                                                                                                                          |                                                                                     |  |  |  |  |  |                                                                                                                       |  |  |  |  |  |  |
| <b>12</b> | Receipt of equipment, materials, drugs, medical writing, gifts or other services | <input checked="" type="checkbox"/> <b>None</b><br><table border="1"> <tr><td> </td><td> </td></tr> <tr><td> </td><td> </td></tr> <tr><td> </td><td> </td></tr> </table> |                                                                                     |  |  |  |  |  | <table border="1"> <tr><td> </td><td> </td></tr> <tr><td> </td><td> </td></tr> <tr><td> </td><td> </td></tr> </table> |  |  |  |  |  |  |
|           |                                                                                  |                                                                                                                                                                          |                                                                                     |  |  |  |  |  |                                                                                                                       |  |  |  |  |  |  |
|           |                                                                                  |                                                                                                                                                                          |                                                                                     |  |  |  |  |  |                                                                                                                       |  |  |  |  |  |  |
|           |                                                                                  |                                                                                                                                                                          |                                                                                     |  |  |  |  |  |                                                                                                                       |  |  |  |  |  |  |
|           |                                                                                  |                                                                                                                                                                          |                                                                                     |  |  |  |  |  |                                                                                                                       |  |  |  |  |  |  |
|           |                                                                                  |                                                                                                                                                                          |                                                                                     |  |  |  |  |  |                                                                                                                       |  |  |  |  |  |  |
|           |                                                                                  |                                                                                                                                                                          |                                                                                     |  |  |  |  |  |                                                                                                                       |  |  |  |  |  |  |
| <b>13</b> | Other financial or non-financial interests                                       | <input checked="" type="checkbox"/> <b>None</b><br><table border="1"> <tr><td> </td><td> </td></tr> <tr><td> </td><td> </td></tr> <tr><td> </td><td> </td></tr> </table> |                                                                                     |  |  |  |  |  | <table border="1"> <tr><td> </td><td> </td></tr> <tr><td> </td><td> </td></tr> <tr><td> </td><td> </td></tr> </table> |  |  |  |  |  |  |
|           |                                                                                  |                                                                                                                                                                          |                                                                                     |  |  |  |  |  |                                                                                                                       |  |  |  |  |  |  |
|           |                                                                                  |                                                                                                                                                                          |                                                                                     |  |  |  |  |  |                                                                                                                       |  |  |  |  |  |  |
|           |                                                                                  |                                                                                                                                                                          |                                                                                     |  |  |  |  |  |                                                                                                                       |  |  |  |  |  |  |
|           |                                                                                  |                                                                                                                                                                          |                                                                                     |  |  |  |  |  |                                                                                                                       |  |  |  |  |  |  |
|           |                                                                                  |                                                                                                                                                                          |                                                                                     |  |  |  |  |  |                                                                                                                       |  |  |  |  |  |  |
|           |                                                                                  |                                                                                                                                                                          |                                                                                     |  |  |  |  |  |                                                                                                                       |  |  |  |  |  |  |

Please place an "X" next to the following statement to indicate your agreement:

I certify that I have answered every question and have not altered the wording of any of the questions on this form.

## ICMJE DISCLOSURE FORM

**Date:** 3/22/2022

**Your Name:** Jennifer A. Gilbride

**Manuscript Title:** Impact of belimumab on organ damage in systemic lupus erythematosus

**Manuscript Number (if known):** ACR-21-0855.R1

In the interest of transparency, we ask you to disclose all relationships/activities/interests listed below that are related to the content of your manuscript. "Related" means any relation with for-profit or not-for-profit third parties whose interests may be affected by the content of the manuscript. Disclosure represents a commitment to transparency and does not necessarily indicate a bias. If you are in doubt about whether to list a relationship/activity/interest, it is preferable that you do so.

The following questions apply to the author's relationships/activities/interests as they relate to the current manuscript only.

The author's relationships/activities/interests should be defined broadly. For example, if your manuscript pertains to the epidemiology of hypertension, you should declare all relationships with manufacturers of antihypertensive medication, even if that medication is not mentioned in the manuscript.

In item #1 below, report all support for the work reported in this manuscript without time limit. For all other items, the time frame for disclosure is the past 36 months.

|                                                                                                                                                            | Name all entities with whom you have this relationship or indicate none (add rows as needed)                                                                            | Specifications/Comments (e.g., if payments were made to you or to your institution)                                                                                                                                                                                                                                                                                                                                                                                                                                                                               |                                                            |  |                                                                                                                                                            |  |                                           |  |
|------------------------------------------------------------------------------------------------------------------------------------------------------------|-------------------------------------------------------------------------------------------------------------------------------------------------------------------------|-------------------------------------------------------------------------------------------------------------------------------------------------------------------------------------------------------------------------------------------------------------------------------------------------------------------------------------------------------------------------------------------------------------------------------------------------------------------------------------------------------------------------------------------------------------------|------------------------------------------------------------|--|------------------------------------------------------------------------------------------------------------------------------------------------------------|--|-------------------------------------------|--|
| Time frame: Since the initial planning of the work                                                                                                         |                                                                                                                                                                         |                                                                                                                                                                                                                                                                                                                                                                                                                                                                                                                                                                   |                                                            |  |                                                                                                                                                            |  |                                           |  |
| 1                                                                                                                                                          | All support for the present manuscript (e.g., funding, provision of study materials, medical writing, article processing charges, etc.)<br>No time limit for this item. | <input type="checkbox"/> None<br><br><table border="1" style="width: 100%; border-collapse: collapse;"> <tr> <td style="width: 60%;">Funding for this research was provided by GlaxoSmithKline.</td> <td style="width: 40%;"></td> </tr> <tr> <td>Medical writing support was provided by Casmira Brazaitis, PhD, of Fishawack Indicia Ltd, UK, part of Fishawack Health, and was funded by GlaxoSmithKline.</td> <td></td> </tr> <tr> <td colspan="2" style="text-align: right; font-size: small;">Click the tab key to add additional rows.</td> </tr> </table> | Funding for this research was provided by GlaxoSmithKline. |  | Medical writing support was provided by Casmira Brazaitis, PhD, of Fishawack Indicia Ltd, UK, part of Fishawack Health, and was funded by GlaxoSmithKline. |  | Click the tab key to add additional rows. |  |
| Funding for this research was provided by GlaxoSmithKline.                                                                                                 |                                                                                                                                                                         |                                                                                                                                                                                                                                                                                                                                                                                                                                                                                                                                                                   |                                                            |  |                                                                                                                                                            |  |                                           |  |
| Medical writing support was provided by Casmira Brazaitis, PhD, of Fishawack Indicia Ltd, UK, part of Fishawack Health, and was funded by GlaxoSmithKline. |                                                                                                                                                                         |                                                                                                                                                                                                                                                                                                                                                                                                                                                                                                                                                                   |                                                            |  |                                                                                                                                                            |  |                                           |  |
| Click the tab key to add additional rows.                                                                                                                  |                                                                                                                                                                         |                                                                                                                                                                                                                                                                                                                                                                                                                                                                                                                                                                   |                                                            |  |                                                                                                                                                            |  |                                           |  |
| Time frame: past 36 months                                                                                                                                 |                                                                                                                                                                         |                                                                                                                                                                                                                                                                                                                                                                                                                                                                                                                                                                   |                                                            |  |                                                                                                                                                            |  |                                           |  |
| 2                                                                                                                                                          | Grants or contracts from any entity (if not indicated in item #1 above).                                                                                                | <input checked="" type="checkbox"/> None<br><br><table border="1" style="width: 100%; border-collapse: collapse;"> <tr><td style="width: 60%; height: 20px;"></td><td style="width: 40%;"></td></tr> <tr><td style="height: 20px;"></td><td></td></tr> <tr><td style="height: 20px;"></td><td></td></tr> </table>                                                                                                                                                                                                                                                 |                                                            |  |                                                                                                                                                            |  |                                           |  |
|                                                                                                                                                            |                                                                                                                                                                         |                                                                                                                                                                                                                                                                                                                                                                                                                                                                                                                                                                   |                                                            |  |                                                                                                                                                            |  |                                           |  |
|                                                                                                                                                            |                                                                                                                                                                         |                                                                                                                                                                                                                                                                                                                                                                                                                                                                                                                                                                   |                                                            |  |                                                                                                                                                            |  |                                           |  |
|                                                                                                                                                            |                                                                                                                                                                         |                                                                                                                                                                                                                                                                                                                                                                                                                                                                                                                                                                   |                                                            |  |                                                                                                                                                            |  |                                           |  |

|    |                                                                                                              | Name all entities with whom you have this relationship or indicate none (add rows as needed) | Specifications/Comments (e.g., if payments were made to you or to your institution)                                                         |  |  |  |  |  |  |  |  |
|----|--------------------------------------------------------------------------------------------------------------|----------------------------------------------------------------------------------------------|---------------------------------------------------------------------------------------------------------------------------------------------|--|--|--|--|--|--|--|--|
| 3  | Royalties or licenses                                                                                        | <input checked="" type="checkbox"/> None                                                     |                                                                                                                                             |  |  |  |  |  |  |  |  |
| 4  | Consulting fees                                                                                              | <input checked="" type="checkbox"/> None                                                     | <table border="1"> <tr><td></td><td></td></tr> <tr><td></td><td></td></tr> <tr><td></td><td></td></tr> <tr><td></td><td></td></tr> </table> |  |  |  |  |  |  |  |  |
|    |                                                                                                              |                                                                                              |                                                                                                                                             |  |  |  |  |  |  |  |  |
|    |                                                                                                              |                                                                                              |                                                                                                                                             |  |  |  |  |  |  |  |  |
|    |                                                                                                              |                                                                                              |                                                                                                                                             |  |  |  |  |  |  |  |  |
|    |                                                                                                              |                                                                                              |                                                                                                                                             |  |  |  |  |  |  |  |  |
| 5  | Payment or honoraria for lectures, presentations, speakers bureaus, manuscript writing or educational events | <input checked="" type="checkbox"/> None                                                     |                                                                                                                                             |  |  |  |  |  |  |  |  |
| 6  | Payment for expert testimony                                                                                 | <input checked="" type="checkbox"/> None                                                     | <table border="1"> <tr><td></td><td></td></tr> <tr><td></td><td></td></tr> <tr><td></td><td></td></tr> </table>                             |  |  |  |  |  |  |  |  |
|    |                                                                                                              |                                                                                              |                                                                                                                                             |  |  |  |  |  |  |  |  |
|    |                                                                                                              |                                                                                              |                                                                                                                                             |  |  |  |  |  |  |  |  |
|    |                                                                                                              |                                                                                              |                                                                                                                                             |  |  |  |  |  |  |  |  |
| 7  | Support for attending meetings and/or travel                                                                 | <input checked="" type="checkbox"/> None                                                     | <table border="1"> <tr><td></td><td></td></tr> <tr><td></td><td></td></tr> <tr><td></td><td></td></tr> </table>                             |  |  |  |  |  |  |  |  |
|    |                                                                                                              |                                                                                              |                                                                                                                                             |  |  |  |  |  |  |  |  |
|    |                                                                                                              |                                                                                              |                                                                                                                                             |  |  |  |  |  |  |  |  |
|    |                                                                                                              |                                                                                              |                                                                                                                                             |  |  |  |  |  |  |  |  |
| 8  | Patents planned, issued or pending                                                                           | <input checked="" type="checkbox"/> None                                                     | <table border="1"> <tr><td></td><td></td></tr> <tr><td></td><td></td></tr> <tr><td></td><td></td></tr> </table>                             |  |  |  |  |  |  |  |  |
|    |                                                                                                              |                                                                                              |                                                                                                                                             |  |  |  |  |  |  |  |  |
|    |                                                                                                              |                                                                                              |                                                                                                                                             |  |  |  |  |  |  |  |  |
|    |                                                                                                              |                                                                                              |                                                                                                                                             |  |  |  |  |  |  |  |  |
| 9  | Participation on a Data Safety Monitoring Board or Advisory Board                                            | <input checked="" type="checkbox"/> None                                                     | <table border="1"> <tr><td></td><td></td></tr> <tr><td></td><td></td></tr> <tr><td></td><td></td></tr> </table>                             |  |  |  |  |  |  |  |  |
|    |                                                                                                              |                                                                                              |                                                                                                                                             |  |  |  |  |  |  |  |  |
|    |                                                                                                              |                                                                                              |                                                                                                                                             |  |  |  |  |  |  |  |  |
|    |                                                                                                              |                                                                                              |                                                                                                                                             |  |  |  |  |  |  |  |  |
| 10 | Leadership or fiduciary role in                                                                              | <input checked="" type="checkbox"/> None                                                     |                                                                                                                                             |  |  |  |  |  |  |  |  |

|           |                                                                                  | Name all entities with whom you have this relationship or indicate none (add rows as needed)       | Specifications/Comments (e.g., if payments were made to you or to your institution) |
|-----------|----------------------------------------------------------------------------------|----------------------------------------------------------------------------------------------------|-------------------------------------------------------------------------------------|
|           | other board, society, committee or advocacy group, paid or unpaid                | <input type="checkbox"/>                                                                           |                                                                                     |
| <b>11</b> | Stock or stock options                                                           | <input type="checkbox"/> <b>None</b>                                                               |                                                                                     |
|           |                                                                                  | <input type="checkbox"/> Holds stocks and shares in GlaxoSmithKline                                |                                                                                     |
| <b>12</b> | Receipt of equipment, materials, drugs, medical writing, gifts or other services | <input checked="" type="checkbox"/> <b>None</b>                                                    |                                                                                     |
| <b>13</b> | Other financial or non-financial interests                                       | <input type="checkbox"/> <b>None</b>                                                               |                                                                                     |
|           |                                                                                  | <input type="checkbox"/> Employee of GlaxoSmithKline at the time of the manuscript being initiated |                                                                                     |

**Please place an "X" next to the following statement to indicate your agreement:**

I certify that I have answered every question and have not altered the wording of any of the questions on this form.

## ICMJE DISCLOSURE FORM

**Date:** 3/22/2022

**Your Name:** Joan T. Merrill

**Manuscript Title:** Impact of belimumab on organ damage in systemic lupus erythematosus

**Manuscript Number (if known):** ACR-21-0855.R1

In the interest of transparency, we ask you to disclose all relationships/activities/interests listed below that are related to the content of your manuscript. "Related" means any relation with for-profit or not-for-profit third parties whose interests may be affected by the content of the manuscript. Disclosure represents a commitment to transparency and does not necessarily indicate a bias. If you are in doubt about whether to list a relationship/activity/interest, it is preferable that you do so.

The following questions apply to the author's relationships/activities/interests as they relate to the current manuscript only.

The author's relationships/activities/interests should be defined broadly. For example, if your manuscript pertains to the epidemiology of hypertension, you should declare all relationships with manufacturers of antihypertensive medication, even if that medication is not mentioned in the manuscript.

In item #1 below, report all support for the work reported in this manuscript without time limit. For all other items, the time frame for disclosure is the past 36 months.

|                                                                                                                                                            | Name all entities with whom you have this relationship or indicate none (add rows as needed)                                                                            | Specifications/Comments (e.g., if payments were made to you or to your institution)                                                                                                                                                                                                                                                                                                                                                                                                                                                                                                      |                                                            |  |                                                                                                                                                            |  |                                                                        |                                           |
|------------------------------------------------------------------------------------------------------------------------------------------------------------|-------------------------------------------------------------------------------------------------------------------------------------------------------------------------|------------------------------------------------------------------------------------------------------------------------------------------------------------------------------------------------------------------------------------------------------------------------------------------------------------------------------------------------------------------------------------------------------------------------------------------------------------------------------------------------------------------------------------------------------------------------------------------|------------------------------------------------------------|--|------------------------------------------------------------------------------------------------------------------------------------------------------------|--|------------------------------------------------------------------------|-------------------------------------------|
| Time frame: Since the initial planning of the work                                                                                                         |                                                                                                                                                                         |                                                                                                                                                                                                                                                                                                                                                                                                                                                                                                                                                                                          |                                                            |  |                                                                                                                                                            |  |                                                                        |                                           |
| 1                                                                                                                                                          | All support for the present manuscript (e.g., funding, provision of study materials, medical writing, article processing charges, etc.)<br>No time limit for this item. | <input type="checkbox"/> None<br><br><table border="1" style="width: 100%; border-collapse: collapse;"> <tr> <td style="width: 60%;">Funding for this research was provided by GlaxoSmithKline.</td> <td style="width: 40%;"></td> </tr> <tr> <td>Medical writing support was provided by Casmira Brazaitis, PhD, of Fishawack Indicia Ltd, UK, part of Fishawack Health, and was funded by GlaxoSmithKline.</td> <td></td> </tr> <tr> <td>Received research funding from GSK for an investigator-sponsored trial</td> <td>Click the tab key to add additional rows.</td> </tr> </table> | Funding for this research was provided by GlaxoSmithKline. |  | Medical writing support was provided by Casmira Brazaitis, PhD, of Fishawack Indicia Ltd, UK, part of Fishawack Health, and was funded by GlaxoSmithKline. |  | Received research funding from GSK for an investigator-sponsored trial | Click the tab key to add additional rows. |
| Funding for this research was provided by GlaxoSmithKline.                                                                                                 |                                                                                                                                                                         |                                                                                                                                                                                                                                                                                                                                                                                                                                                                                                                                                                                          |                                                            |  |                                                                                                                                                            |  |                                                                        |                                           |
| Medical writing support was provided by Casmira Brazaitis, PhD, of Fishawack Indicia Ltd, UK, part of Fishawack Health, and was funded by GlaxoSmithKline. |                                                                                                                                                                         |                                                                                                                                                                                                                                                                                                                                                                                                                                                                                                                                                                                          |                                                            |  |                                                                                                                                                            |  |                                                                        |                                           |
| Received research funding from GSK for an investigator-sponsored trial                                                                                     | Click the tab key to add additional rows.                                                                                                                               |                                                                                                                                                                                                                                                                                                                                                                                                                                                                                                                                                                                          |                                                            |  |                                                                                                                                                            |  |                                                                        |                                           |
| Time frame: past 36 months                                                                                                                                 |                                                                                                                                                                         |                                                                                                                                                                                                                                                                                                                                                                                                                                                                                                                                                                                          |                                                            |  |                                                                                                                                                            |  |                                                                        |                                           |
| 2                                                                                                                                                          | Grants or contracts from any entity (if not indicated in item #1 above).                                                                                                | <input checked="" type="checkbox"/> None<br><br><table border="1" style="width: 100%; border-collapse: collapse;"> <tr><td style="width: 60%; height: 20px;"></td><td style="width: 40%;"></td></tr> <tr><td style="height: 20px;"></td><td></td></tr> <tr><td style="height: 20px;"></td><td></td></tr> </table>                                                                                                                                                                                                                                                                        |                                                            |  |                                                                                                                                                            |  |                                                                        |                                           |
|                                                                                                                                                            |                                                                                                                                                                         |                                                                                                                                                                                                                                                                                                                                                                                                                                                                                                                                                                                          |                                                            |  |                                                                                                                                                            |  |                                                                        |                                           |
|                                                                                                                                                            |                                                                                                                                                                         |                                                                                                                                                                                                                                                                                                                                                                                                                                                                                                                                                                                          |                                                            |  |                                                                                                                                                            |  |                                                                        |                                           |
|                                                                                                                                                            |                                                                                                                                                                         |                                                                                                                                                                                                                                                                                                                                                                                                                                                                                                                                                                                          |                                                            |  |                                                                                                                                                            |  |                                                                        |                                           |

|                                                                                                                                                                                                                            |                                                                                                              | Name all entities with whom you have this relationship or indicate none (add rows as needed)                                                                                                                                                                                                                                                       | Specifications/Comments (e.g., if payments were made to you or to your institution)                                                                                                                                        |  |  |  |  |  |  |
|----------------------------------------------------------------------------------------------------------------------------------------------------------------------------------------------------------------------------|--------------------------------------------------------------------------------------------------------------|----------------------------------------------------------------------------------------------------------------------------------------------------------------------------------------------------------------------------------------------------------------------------------------------------------------------------------------------------|----------------------------------------------------------------------------------------------------------------------------------------------------------------------------------------------------------------------------|--|--|--|--|--|--|
| 3                                                                                                                                                                                                                          | Royalties or licenses                                                                                        | <input checked="" type="checkbox"/> None                                                                                                                                                                                                                                                                                                           |                                                                                                                                                                                                                            |  |  |  |  |  |  |
| 4                                                                                                                                                                                                                          | Consulting fees                                                                                              | <input type="checkbox"/> None                                                                                                                                                                                                                                                                                                                      |                                                                                                                                                                                                                            |  |  |  |  |  |  |
|                                                                                                                                                                                                                            |                                                                                                              | <table border="1"> <tr> <td>Consultant for GSK and for other pharmaceutical companies developing treatments for lupus including Abbvie, Amgen, AstraZeneca, Aurinia, BMS, EMD Serono, Genetech, Janssen, Lilly, Provention, Remegen, Sanofi, and Zenas</td> <td></td> </tr> <tr> <td></td> <td></td> </tr> <tr> <td></td> <td></td> </tr> </table> | Consultant for GSK and for other pharmaceutical companies developing treatments for lupus including Abbvie, Amgen, AstraZeneca, Aurinia, BMS, EMD Serono, Genetech, Janssen, Lilly, Provention, Remegen, Sanofi, and Zenas |  |  |  |  |  |  |
| Consultant for GSK and for other pharmaceutical companies developing treatments for lupus including Abbvie, Amgen, AstraZeneca, Aurinia, BMS, EMD Serono, Genetech, Janssen, Lilly, Provention, Remegen, Sanofi, and Zenas |                                                                                                              |                                                                                                                                                                                                                                                                                                                                                    |                                                                                                                                                                                                                            |  |  |  |  |  |  |
|                                                                                                                                                                                                                            |                                                                                                              |                                                                                                                                                                                                                                                                                                                                                    |                                                                                                                                                                                                                            |  |  |  |  |  |  |
|                                                                                                                                                                                                                            |                                                                                                              |                                                                                                                                                                                                                                                                                                                                                    |                                                                                                                                                                                                                            |  |  |  |  |  |  |
| 5                                                                                                                                                                                                                          | Payment or honoraria for lectures, presentations, speakers bureaus, manuscript writing or educational events | <input checked="" type="checkbox"/> None                                                                                                                                                                                                                                                                                                           |                                                                                                                                                                                                                            |  |  |  |  |  |  |
| 6                                                                                                                                                                                                                          | Payment for expert testimony                                                                                 | <input checked="" type="checkbox"/> None                                                                                                                                                                                                                                                                                                           |                                                                                                                                                                                                                            |  |  |  |  |  |  |
|                                                                                                                                                                                                                            |                                                                                                              | <table border="1"> <tr> <td></td> <td></td> </tr> <tr> <td></td> <td></td> </tr> </table>                                                                                                                                                                                                                                                          |                                                                                                                                                                                                                            |  |  |  |  |  |  |
|                                                                                                                                                                                                                            |                                                                                                              |                                                                                                                                                                                                                                                                                                                                                    |                                                                                                                                                                                                                            |  |  |  |  |  |  |
|                                                                                                                                                                                                                            |                                                                                                              |                                                                                                                                                                                                                                                                                                                                                    |                                                                                                                                                                                                                            |  |  |  |  |  |  |
| 7                                                                                                                                                                                                                          | Support for attending meetings and/or travel                                                                 | <input checked="" type="checkbox"/> None                                                                                                                                                                                                                                                                                                           |                                                                                                                                                                                                                            |  |  |  |  |  |  |
|                                                                                                                                                                                                                            |                                                                                                              | <table border="1"> <tr> <td></td> <td></td> </tr> <tr> <td></td> <td></td> </tr> </table>                                                                                                                                                                                                                                                          |                                                                                                                                                                                                                            |  |  |  |  |  |  |
|                                                                                                                                                                                                                            |                                                                                                              |                                                                                                                                                                                                                                                                                                                                                    |                                                                                                                                                                                                                            |  |  |  |  |  |  |
|                                                                                                                                                                                                                            |                                                                                                              |                                                                                                                                                                                                                                                                                                                                                    |                                                                                                                                                                                                                            |  |  |  |  |  |  |
| 8                                                                                                                                                                                                                          | Patents planned, issued or pending                                                                           | <input checked="" type="checkbox"/> None                                                                                                                                                                                                                                                                                                           |                                                                                                                                                                                                                            |  |  |  |  |  |  |
|                                                                                                                                                                                                                            |                                                                                                              | <table border="1"> <tr> <td></td> <td></td> </tr> <tr> <td></td> <td></td> </tr> </table>                                                                                                                                                                                                                                                          |                                                                                                                                                                                                                            |  |  |  |  |  |  |
|                                                                                                                                                                                                                            |                                                                                                              |                                                                                                                                                                                                                                                                                                                                                    |                                                                                                                                                                                                                            |  |  |  |  |  |  |
|                                                                                                                                                                                                                            |                                                                                                              |                                                                                                                                                                                                                                                                                                                                                    |                                                                                                                                                                                                                            |  |  |  |  |  |  |
| 9                                                                                                                                                                                                                          | Participation on a Data Safety Monitoring                                                                    | <input checked="" type="checkbox"/> None                                                                                                                                                                                                                                                                                                           |                                                                                                                                                                                                                            |  |  |  |  |  |  |
|                                                                                                                                                                                                                            |                                                                                                              | <table border="1"> <tr> <td></td> <td></td> </tr> <tr> <td></td> <td></td> </tr> </table>                                                                                                                                                                                                                                                          |                                                                                                                                                                                                                            |  |  |  |  |  |  |
|                                                                                                                                                                                                                            |                                                                                                              |                                                                                                                                                                                                                                                                                                                                                    |                                                                                                                                                                                                                            |  |  |  |  |  |  |
|                                                                                                                                                                                                                            |                                                                                                              |                                                                                                                                                                                                                                                                                                                                                    |                                                                                                                                                                                                                            |  |  |  |  |  |  |



|           |                                                                                                   | Name all entities with whom you have this relationship or indicate none (add rows as needed) | Specifications/Comments (e.g., if payments were made to you or to your institution) |
|-----------|---------------------------------------------------------------------------------------------------|----------------------------------------------------------------------------------------------|-------------------------------------------------------------------------------------|
|           | Board or Advisory Board                                                                           |                                                                                              |                                                                                     |
| <b>10</b> | Leadership or fiduciary role in other board, society, committee or advocacy group, paid or unpaid | <input checked="" type="checkbox"/> <b>None</b>                                              |                                                                                     |
|           |                                                                                                   |                                                                                              |                                                                                     |
|           |                                                                                                   |                                                                                              |                                                                                     |
| <b>11</b> | Stock or stock options                                                                            | <input checked="" type="checkbox"/> <b>None</b>                                              |                                                                                     |
|           |                                                                                                   |                                                                                              |                                                                                     |
|           |                                                                                                   |                                                                                              |                                                                                     |
| <b>12</b> | Receipt of equipment, materials, drugs, medical writing, gifts or other services                  | <input checked="" type="checkbox"/> <b>None</b>                                              |                                                                                     |
|           |                                                                                                   |                                                                                              |                                                                                     |
|           |                                                                                                   |                                                                                              |                                                                                     |
| <b>13</b> | Other financial or non-financial interests                                                        | <input checked="" type="checkbox"/> <b>None</b>                                              |                                                                                     |
|           |                                                                                                   |                                                                                              |                                                                                     |
|           |                                                                                                   |                                                                                              |                                                                                     |

Please place an "X" next to the following statement to indicate your agreement:

I certify that I have answered every question and have not altered the wording of any of the questions on this form.

## ICMJE DISCLOSURE FORM

**Date:** 3/22/2022

**Your Name:** Maria Dall'Era

**Manuscript Title:** Impact of belimumab on organ damage in systemic lupus erythematosus

**Manuscript Number (if known):** ACR-21-0855.R1

In the interest of transparency, we ask you to disclose all relationships/activities/interests listed below that are related to the content of your manuscript. "Related" means any relation with for-profit or not-for-profit third parties whose interests may be affected by the content of the manuscript. Disclosure represents a commitment to transparency and does not necessarily indicate a bias. If you are in doubt about whether to list a relationship/activity/interest, it is preferable that you do so.

The following questions apply to the author's relationships/activities/interests as they relate to the current manuscript only.

The author's relationships/activities/interests should be defined broadly. For example, if your manuscript pertains to the epidemiology of hypertension, you should declare all relationships with manufacturers of antihypertensive medication, even if that medication is not mentioned in the manuscript.

In item #1 below, report all support for the work reported in this manuscript without time limit. For all other items, the time frame for disclosure is the past 36 months.

|                                                                                                                                                            | Name all entities with whom you have this relationship or indicate none (add rows as needed)                                                                            | Specifications/Comments (e.g., if payments were made to you or to your institution)                                                                                                                                                                                                                                                                                                                                                                                                                                    |                                                            |  |                                                                                                                                                            |  |  |  |  |  |
|------------------------------------------------------------------------------------------------------------------------------------------------------------|-------------------------------------------------------------------------------------------------------------------------------------------------------------------------|------------------------------------------------------------------------------------------------------------------------------------------------------------------------------------------------------------------------------------------------------------------------------------------------------------------------------------------------------------------------------------------------------------------------------------------------------------------------------------------------------------------------|------------------------------------------------------------|--|------------------------------------------------------------------------------------------------------------------------------------------------------------|--|--|--|--|--|
| Time frame: Since the initial planning of the work                                                                                                         |                                                                                                                                                                         |                                                                                                                                                                                                                                                                                                                                                                                                                                                                                                                        |                                                            |  |                                                                                                                                                            |  |  |  |  |  |
| 1                                                                                                                                                          | All support for the present manuscript (e.g., funding, provision of study materials, medical writing, article processing charges, etc.)<br>No time limit for this item. | <input type="checkbox"/> None <table border="1" style="width: 100%; border-collapse: collapse; margin-top: 5px;"> <tr> <td style="width: 60%;">Funding for this research was provided by GlaxoSmithKline.</td> <td style="width: 40%;"></td> </tr> <tr> <td>Medical writing support was provided by Casmira Brazaitis, PhD, of Fishawack Indicia Ltd, UK, part of Fishawack Health, and was funded by GlaxoSmithKline.</td> <td></td> </tr> <tr> <td> </td> <td> </td> </tr> <tr> <td> </td> <td> </td> </tr> </table> | Funding for this research was provided by GlaxoSmithKline. |  | Medical writing support was provided by Casmira Brazaitis, PhD, of Fishawack Indicia Ltd, UK, part of Fishawack Health, and was funded by GlaxoSmithKline. |  |  |  |  |  |
| Funding for this research was provided by GlaxoSmithKline.                                                                                                 |                                                                                                                                                                         |                                                                                                                                                                                                                                                                                                                                                                                                                                                                                                                        |                                                            |  |                                                                                                                                                            |  |  |  |  |  |
| Medical writing support was provided by Casmira Brazaitis, PhD, of Fishawack Indicia Ltd, UK, part of Fishawack Health, and was funded by GlaxoSmithKline. |                                                                                                                                                                         |                                                                                                                                                                                                                                                                                                                                                                                                                                                                                                                        |                                                            |  |                                                                                                                                                            |  |  |  |  |  |
|                                                                                                                                                            |                                                                                                                                                                         |                                                                                                                                                                                                                                                                                                                                                                                                                                                                                                                        |                                                            |  |                                                                                                                                                            |  |  |  |  |  |
|                                                                                                                                                            |                                                                                                                                                                         |                                                                                                                                                                                                                                                                                                                                                                                                                                                                                                                        |                                                            |  |                                                                                                                                                            |  |  |  |  |  |
| Time frame: past 36 months                                                                                                                                 |                                                                                                                                                                         |                                                                                                                                                                                                                                                                                                                                                                                                                                                                                                                        |                                                            |  |                                                                                                                                                            |  |  |  |  |  |
| 2                                                                                                                                                          | Grants or contracts from any entity (if not indicated in item #1 above).                                                                                                | <input checked="" type="checkbox"/> <b>None</b> <table border="1" style="width: 100%; border-collapse: collapse; margin-top: 5px;"> <tr> <td style="width: 60%;"> </td> <td style="width: 40%;"> </td> </tr> <tr> <td> </td> <td> </td> </tr> <tr> <td> </td> <td> </td> </tr> </table>                                                                                                                                                                                                                                |                                                            |  |                                                                                                                                                            |  |  |  |  |  |
|                                                                                                                                                            |                                                                                                                                                                         |                                                                                                                                                                                                                                                                                                                                                                                                                                                                                                                        |                                                            |  |                                                                                                                                                            |  |  |  |  |  |
|                                                                                                                                                            |                                                                                                                                                                         |                                                                                                                                                                                                                                                                                                                                                                                                                                                                                                                        |                                                            |  |                                                                                                                                                            |  |  |  |  |  |
|                                                                                                                                                            |                                                                                                                                                                         |                                                                                                                                                                                                                                                                                                                                                                                                                                                                                                                        |                                                            |  |                                                                                                                                                            |  |  |  |  |  |

|                               |                                                                                                              | Name all entities with whom you have this relationship or indicate none (add rows as needed) | Specifications/Comments (e.g., if payments were made to you or to your institution)                                                                                       |                               |  |  |  |  |  |  |  |
|-------------------------------|--------------------------------------------------------------------------------------------------------------|----------------------------------------------------------------------------------------------|---------------------------------------------------------------------------------------------------------------------------------------------------------------------------|-------------------------------|--|--|--|--|--|--|--|
| 3                             | Royalties or licenses                                                                                        | <input checked="" type="checkbox"/> None                                                     |                                                                                                                                                                           |                               |  |  |  |  |  |  |  |
| 4                             | Consulting fees                                                                                              | <input type="checkbox"/> None                                                                | <table border="1"> <tr> <td>Consultant for GSK</td> <td></td> </tr> <tr> <td></td> <td></td> </tr> <tr> <td></td> <td></td> </tr> <tr> <td></td> <td></td> </tr> </table> | Consultant for GSK            |  |  |  |  |  |  |  |
| Consultant for GSK            |                                                                                                              |                                                                                              |                                                                                                                                                                           |                               |  |  |  |  |  |  |  |
|                               |                                                                                                              |                                                                                              |                                                                                                                                                                           |                               |  |  |  |  |  |  |  |
|                               |                                                                                                              |                                                                                              |                                                                                                                                                                           |                               |  |  |  |  |  |  |  |
|                               |                                                                                                              |                                                                                              |                                                                                                                                                                           |                               |  |  |  |  |  |  |  |
| 5                             | Payment or honoraria for lectures, presentations, speakers bureaus, manuscript writing or educational events | <input checked="" type="checkbox"/> None                                                     |                                                                                                                                                                           |                               |  |  |  |  |  |  |  |
| 6                             | Payment for expert testimony                                                                                 | <input checked="" type="checkbox"/> None                                                     | <table border="1"> <tr> <td></td> <td></td> </tr> <tr> <td></td> <td></td> </tr> <tr> <td></td> <td></td> </tr> </table>                                                  |                               |  |  |  |  |  |  |  |
|                               |                                                                                                              |                                                                                              |                                                                                                                                                                           |                               |  |  |  |  |  |  |  |
|                               |                                                                                                              |                                                                                              |                                                                                                                                                                           |                               |  |  |  |  |  |  |  |
|                               |                                                                                                              |                                                                                              |                                                                                                                                                                           |                               |  |  |  |  |  |  |  |
| 7                             | Support for attending meetings and/or travel                                                                 | <input checked="" type="checkbox"/> None                                                     | <table border="1"> <tr> <td></td> <td></td> </tr> <tr> <td></td> <td></td> </tr> <tr> <td></td> <td></td> </tr> </table>                                                  |                               |  |  |  |  |  |  |  |
|                               |                                                                                                              |                                                                                              |                                                                                                                                                                           |                               |  |  |  |  |  |  |  |
|                               |                                                                                                              |                                                                                              |                                                                                                                                                                           |                               |  |  |  |  |  |  |  |
|                               |                                                                                                              |                                                                                              |                                                                                                                                                                           |                               |  |  |  |  |  |  |  |
| 8                             | Patents planned, issued or pending                                                                           | <input checked="" type="checkbox"/> None                                                     | <table border="1"> <tr> <td></td> <td></td> </tr> <tr> <td></td> <td></td> </tr> <tr> <td></td> <td></td> </tr> </table>                                                  |                               |  |  |  |  |  |  |  |
|                               |                                                                                                              |                                                                                              |                                                                                                                                                                           |                               |  |  |  |  |  |  |  |
|                               |                                                                                                              |                                                                                              |                                                                                                                                                                           |                               |  |  |  |  |  |  |  |
|                               |                                                                                                              |                                                                                              |                                                                                                                                                                           |                               |  |  |  |  |  |  |  |
| 9                             | Participation on a Data Safety Monitoring Board or Advisory Board                                            | <input type="checkbox"/> None                                                                | <table border="1"> <tr> <td>Advisory board member for GSK</td> <td></td> </tr> <tr> <td></td> <td></td> </tr> <tr> <td></td> <td></td> </tr> </table>                     | Advisory board member for GSK |  |  |  |  |  |  |  |
| Advisory board member for GSK |                                                                                                              |                                                                                              |                                                                                                                                                                           |                               |  |  |  |  |  |  |  |
|                               |                                                                                                              |                                                                                              |                                                                                                                                                                           |                               |  |  |  |  |  |  |  |
|                               |                                                                                                              |                                                                                              |                                                                                                                                                                           |                               |  |  |  |  |  |  |  |
| 10                            | Leadership or fiduciary role in                                                                              | <input checked="" type="checkbox"/> None                                                     |                                                                                                                                                                           |                               |  |  |  |  |  |  |  |

|           |                                                                                  | Name all entities with whom you have this relationship or indicate none (add rows as needed)                                                                       | Specifications/Comments (e.g., if payments were made to you or to your institution) |  |  |  |  |  |  |
|-----------|----------------------------------------------------------------------------------|--------------------------------------------------------------------------------------------------------------------------------------------------------------------|-------------------------------------------------------------------------------------|--|--|--|--|--|--|
|           | other board, society, committee or advocacy group, paid or unpaid                | <table border="1"> <tr><td></td><td></td></tr> <tr><td></td><td></td></tr> <tr><td></td><td></td></tr> </table>                                                    |                                                                                     |  |  |  |  |  |  |
|           |                                                                                  |                                                                                                                                                                    |                                                                                     |  |  |  |  |  |  |
|           |                                                                                  |                                                                                                                                                                    |                                                                                     |  |  |  |  |  |  |
|           |                                                                                  |                                                                                                                                                                    |                                                                                     |  |  |  |  |  |  |
| <b>11</b> | Stock or stock options                                                           | <input checked="" type="checkbox"/> <b>None</b><br><table border="1"> <tr><td></td><td></td></tr> <tr><td></td><td></td></tr> <tr><td></td><td></td></tr> </table> |                                                                                     |  |  |  |  |  |  |
|           |                                                                                  |                                                                                                                                                                    |                                                                                     |  |  |  |  |  |  |
|           |                                                                                  |                                                                                                                                                                    |                                                                                     |  |  |  |  |  |  |
|           |                                                                                  |                                                                                                                                                                    |                                                                                     |  |  |  |  |  |  |
| <b>12</b> | Receipt of equipment, materials, drugs, medical writing, gifts or other services | <input checked="" type="checkbox"/> <b>None</b><br><table border="1"> <tr><td></td><td></td></tr> <tr><td></td><td></td></tr> <tr><td></td><td></td></tr> </table> |                                                                                     |  |  |  |  |  |  |
|           |                                                                                  |                                                                                                                                                                    |                                                                                     |  |  |  |  |  |  |
|           |                                                                                  |                                                                                                                                                                    |                                                                                     |  |  |  |  |  |  |
|           |                                                                                  |                                                                                                                                                                    |                                                                                     |  |  |  |  |  |  |
| <b>13</b> | Other financial or non-financial interests                                       | <input checked="" type="checkbox"/> <b>None</b><br><table border="1"> <tr><td></td><td></td></tr> <tr><td></td><td></td></tr> <tr><td></td><td></td></tr> </table> |                                                                                     |  |  |  |  |  |  |
|           |                                                                                  |                                                                                                                                                                    |                                                                                     |  |  |  |  |  |  |
|           |                                                                                  |                                                                                                                                                                    |                                                                                     |  |  |  |  |  |  |
|           |                                                                                  |                                                                                                                                                                    |                                                                                     |  |  |  |  |  |  |

Please place an "X" next to the following statement to indicate your agreement:

I certify that I have answered every question and have not altered the wording of any of the questions on this form.

# Petri

## ICMJE DISCLOSURE FORM

**Date:** 3/22/2022

**Your Name:** Michelle Petri

**Manuscript Title:** Impact of belimumab on organ damage in systemic lupus erythematosus

**Manuscript Number (if known):** ACR-21-0855.R1

In the interest of transparency, we ask you to disclose all relationships/activities/interests listed below that are related to the content of your manuscript. "Related" means any relation with for-profit or not-for-profit third parties whose interests may be affected by the content of the manuscript. Disclosure represents a commitment to transparency and does not necessarily indicate a bias. If you are in doubt about whether to list a relationship/activity/interest, it is preferable that you do so.

The following questions apply to the author's relationships/activities/interests as they relate to the current manuscript only.

The author's relationships/activities/interests should be defined broadly. For example, if your manuscript pertains to the epidemiology of hypertension, you should declare all relationships with manufacturers of antihypertensive medication, even if that medication is not mentioned in the manuscript.

In item #1 below, report all support for the work reported in this manuscript without time limit. For all other items, the time frame for disclosure is the past 36 months.

|                                                                                                                                                            | Name all entities with whom you have this relationship or indicate none (add rows as needed)                                                                            | Specifications/Comments (e.g., if payments were made to you or to your institution)                                                                                                                                                                                                                                                                                                                                                                                                        |                                                                   |  |                                                                                                                                                            |  |  |  |  |  |
|------------------------------------------------------------------------------------------------------------------------------------------------------------|-------------------------------------------------------------------------------------------------------------------------------------------------------------------------|--------------------------------------------------------------------------------------------------------------------------------------------------------------------------------------------------------------------------------------------------------------------------------------------------------------------------------------------------------------------------------------------------------------------------------------------------------------------------------------------|-------------------------------------------------------------------|--|------------------------------------------------------------------------------------------------------------------------------------------------------------|--|--|--|--|--|
| Time frame: Since the initial planning of the work                                                                                                         |                                                                                                                                                                         |                                                                                                                                                                                                                                                                                                                                                                                                                                                                                            |                                                                   |  |                                                                                                                                                            |  |  |  |  |  |
| 1                                                                                                                                                          | All support for the present manuscript (e.g., funding, provision of study materials, medical writing, article processing charges, etc.)<br>No time limit for this item. | <input type="checkbox"/> None <table border="1" style="width: 100%; margin-top: 10px;"> <tr> <td style="width: 60%;">Funding for this research was provided by GlaxoSmithKline.</td> <td style="width: 40%;"></td> </tr> <tr> <td>Medical writing support was provided by Casmira Brazaitis, PhD, of Fishawack Indicia Ltd, UK, part of Fishawack Health, and was funded by GlaxoSmithKline.</td> <td></td> </tr> <tr> <td> </td> <td></td> </tr> <tr> <td> </td> <td></td> </tr> </table> | Funding for this research was provided by GlaxoSmithKline.        |  | Medical writing support was provided by Casmira Brazaitis, PhD, of Fishawack Indicia Ltd, UK, part of Fishawack Health, and was funded by GlaxoSmithKline. |  |  |  |  |  |
| Funding for this research was provided by GlaxoSmithKline.                                                                                                 |                                                                                                                                                                         |                                                                                                                                                                                                                                                                                                                                                                                                                                                                                            |                                                                   |  |                                                                                                                                                            |  |  |  |  |  |
| Medical writing support was provided by Casmira Brazaitis, PhD, of Fishawack Indicia Ltd, UK, part of Fishawack Health, and was funded by GlaxoSmithKline. |                                                                                                                                                                         |                                                                                                                                                                                                                                                                                                                                                                                                                                                                                            |                                                                   |  |                                                                                                                                                            |  |  |  |  |  |
|                                                                                                                                                            |                                                                                                                                                                         |                                                                                                                                                                                                                                                                                                                                                                                                                                                                                            |                                                                   |  |                                                                                                                                                            |  |  |  |  |  |
|                                                                                                                                                            |                                                                                                                                                                         |                                                                                                                                                                                                                                                                                                                                                                                                                                                                                            |                                                                   |  |                                                                                                                                                            |  |  |  |  |  |
| Time frame: past 36 months                                                                                                                                 |                                                                                                                                                                         |                                                                                                                                                                                                                                                                                                                                                                                                                                                                                            |                                                                   |  |                                                                                                                                                            |  |  |  |  |  |
| 2                                                                                                                                                          | Grants or contracts from any entity (if not indicated in item #1 above).                                                                                                | <input type="checkbox"/> None <table border="1" style="width: 100%; margin-top: 10px;"> <tr> <td style="width: 60%;">Received research grant support from GSK for an unrelated project</td> <td style="width: 40%;"></td> </tr> <tr> <td> </td> <td></td> </tr> <tr> <td> </td> <td></td> </tr> </table>                                                                                                                                                                                   | Received research grant support from GSK for an unrelated project |  |                                                                                                                                                            |  |  |  |  |  |
| Received research grant support from GSK for an unrelated project                                                                                          |                                                                                                                                                                         |                                                                                                                                                                                                                                                                                                                                                                                                                                                                                            |                                                                   |  |                                                                                                                                                            |  |  |  |  |  |
|                                                                                                                                                            |                                                                                                                                                                         |                                                                                                                                                                                                                                                                                                                                                                                                                                                                                            |                                                                   |  |                                                                                                                                                            |  |  |  |  |  |
|                                                                                                                                                            |                                                                                                                                                                         |                                                                                                                                                                                                                                                                                                                                                                                                                                                                                            |                                                                   |  |                                                                                                                                                            |  |  |  |  |  |

|    |                                                                                                              | Name all entities with whom you have this relationship or indicate none (add rows as needed) | Specifications/Comments (e.g., if payments were made to you or to your institution) |
|----|--------------------------------------------------------------------------------------------------------------|----------------------------------------------------------------------------------------------|-------------------------------------------------------------------------------------|
| 3  | Royalties or licenses                                                                                        | <input checked="" type="checkbox"/> None                                                     |                                                                                     |
| 4  | Consulting fees                                                                                              | <input type="checkbox"/> None                                                                |                                                                                     |
|    |                                                                                                              | Consultant to GSK                                                                            |                                                                                     |
|    |                                                                                                              |                                                                                              |                                                                                     |
|    |                                                                                                              |                                                                                              |                                                                                     |
| 5  | Payment or honoraria for lectures, presentations, speakers bureaus, manuscript writing or educational events | <input checked="" type="checkbox"/> None                                                     |                                                                                     |
| 6  | Payment for expert testimony                                                                                 | <input checked="" type="checkbox"/> None                                                     |                                                                                     |
|    |                                                                                                              |                                                                                              |                                                                                     |
|    |                                                                                                              |                                                                                              |                                                                                     |
| 7  | Support for attending meetings and/or travel                                                                 | <input checked="" type="checkbox"/> None                                                     |                                                                                     |
|    |                                                                                                              |                                                                                              |                                                                                     |
|    |                                                                                                              |                                                                                              |                                                                                     |
| 8  | Patents planned, issued or pending                                                                           | <input checked="" type="checkbox"/> None                                                     |                                                                                     |
|    |                                                                                                              |                                                                                              |                                                                                     |
|    |                                                                                                              |                                                                                              |                                                                                     |
| 9  | Participation on a Data Safety Monitoring Board or Advisory Board                                            | <input checked="" type="checkbox"/> None                                                     |                                                                                     |
|    |                                                                                                              |                                                                                              |                                                                                     |
|    |                                                                                                              |                                                                                              |                                                                                     |
| 10 | Leadership or fiduciary role in                                                                              | <input checked="" type="checkbox"/> None                                                     |                                                                                     |

|           |                                                                                  | Name all entities with whom you have this relationship or indicate none (add rows as needed)                                                                       | Specifications/Comments (e.g., if payments were made to you or to your institution) |  |  |  |  |  |  |
|-----------|----------------------------------------------------------------------------------|--------------------------------------------------------------------------------------------------------------------------------------------------------------------|-------------------------------------------------------------------------------------|--|--|--|--|--|--|
|           | other board, society, committee or advocacy group, paid or unpaid                | <table border="1"> <tr><td></td><td></td></tr> <tr><td></td><td></td></tr> <tr><td></td><td></td></tr> </table>                                                    |                                                                                     |  |  |  |  |  |  |
|           |                                                                                  |                                                                                                                                                                    |                                                                                     |  |  |  |  |  |  |
|           |                                                                                  |                                                                                                                                                                    |                                                                                     |  |  |  |  |  |  |
|           |                                                                                  |                                                                                                                                                                    |                                                                                     |  |  |  |  |  |  |
| <b>11</b> | Stock or stock options                                                           | <input checked="" type="checkbox"/> <b>None</b><br><table border="1"> <tr><td></td><td></td></tr> <tr><td></td><td></td></tr> <tr><td></td><td></td></tr> </table> |                                                                                     |  |  |  |  |  |  |
|           |                                                                                  |                                                                                                                                                                    |                                                                                     |  |  |  |  |  |  |
|           |                                                                                  |                                                                                                                                                                    |                                                                                     |  |  |  |  |  |  |
|           |                                                                                  |                                                                                                                                                                    |                                                                                     |  |  |  |  |  |  |
| <b>12</b> | Receipt of equipment, materials, drugs, medical writing, gifts or other services | <input checked="" type="checkbox"/> <b>None</b><br><table border="1"> <tr><td></td><td></td></tr> <tr><td></td><td></td></tr> <tr><td></td><td></td></tr> </table> |                                                                                     |  |  |  |  |  |  |
|           |                                                                                  |                                                                                                                                                                    |                                                                                     |  |  |  |  |  |  |
|           |                                                                                  |                                                                                                                                                                    |                                                                                     |  |  |  |  |  |  |
|           |                                                                                  |                                                                                                                                                                    |                                                                                     |  |  |  |  |  |  |
| <b>13</b> | Other financial or non-financial interests                                       | <input checked="" type="checkbox"/> <b>None</b><br><table border="1"> <tr><td></td><td></td></tr> <tr><td></td><td></td></tr> <tr><td></td><td></td></tr> </table> |                                                                                     |  |  |  |  |  |  |
|           |                                                                                  |                                                                                                                                                                    |                                                                                     |  |  |  |  |  |  |
|           |                                                                                  |                                                                                                                                                                    |                                                                                     |  |  |  |  |  |  |
|           |                                                                                  |                                                                                                                                                                    |                                                                                     |  |  |  |  |  |  |

Please place an "X" next to the following statement to indicate your agreement:

I certify that I have answered every question and have not altered the wording of any of the questions on this form.

## ICMJE DISCLOSURE FORM

**Date:** 3/22/2022

**Your Name:** Murray B Urowitz

**Manuscript Title:** Impact of belimumab on organ damage in systemic lupus erythematosus

**Manuscript Number (if known):** ACR-21-0855.R1

In the interest of transparency, we ask you to disclose all relationships/activities/interests listed below that are related to the content of your manuscript. "Related" means any relation with for-profit or not-for-profit third parties whose interests may be affected by the content of the manuscript. Disclosure represents a commitment to transparency and does not necessarily indicate a bias. If you are in doubt about whether to list a relationship/activity/interest, it is preferable that you do so.

The following questions apply to the author's relationships/activities/interests as they relate to the current manuscript only.

The author's relationships/activities/interests should be defined broadly. For example, if your manuscript pertains to the epidemiology of hypertension, you should declare all relationships with manufacturers of antihypertensive medication, even if that medication is not mentioned in the manuscript.

In item #1 below, report all support for the work reported in this manuscript without time limit. For all other items, the time frame for disclosure is the past 36 months.

|                                                                                                                                                            | Name all entities with whom you have this relationship or indicate none (add rows as needed)                                                                            | Specifications/Comments (e.g., if payments were made to you or to your institution)                                                                                                                                                                                                                                                                                                                                                                                                          |                                                            |  |                                                                                                                                                            |  |  |  |  |  |
|------------------------------------------------------------------------------------------------------------------------------------------------------------|-------------------------------------------------------------------------------------------------------------------------------------------------------------------------|----------------------------------------------------------------------------------------------------------------------------------------------------------------------------------------------------------------------------------------------------------------------------------------------------------------------------------------------------------------------------------------------------------------------------------------------------------------------------------------------|------------------------------------------------------------|--|------------------------------------------------------------------------------------------------------------------------------------------------------------|--|--|--|--|--|
| Time frame: Since the initial planning of the work                                                                                                         |                                                                                                                                                                         |                                                                                                                                                                                                                                                                                                                                                                                                                                                                                              |                                                            |  |                                                                                                                                                            |  |  |  |  |  |
| 1                                                                                                                                                          | All support for the present manuscript (e.g., funding, provision of study materials, medical writing, article processing charges, etc.)<br>No time limit for this item. | <input type="checkbox"/> None <table border="1" style="width: 100%; margin-top: 10px;"> <tr> <td style="width: 60%;">Funding for this research was provided by GlaxoSmithKline.</td> <td style="width: 40%;"></td> </tr> <tr> <td>Medical writing support was provided by Casmira Brazaitis, PhD, of Fishawack Indicia Ltd, UK, part of Fishawack Health, and was funded by GlaxoSmithKline.</td> <td></td> </tr> <tr> <td> </td> <td> </td> </tr> <tr> <td> </td> <td> </td> </tr> </table> | Funding for this research was provided by GlaxoSmithKline. |  | Medical writing support was provided by Casmira Brazaitis, PhD, of Fishawack Indicia Ltd, UK, part of Fishawack Health, and was funded by GlaxoSmithKline. |  |  |  |  |  |
| Funding for this research was provided by GlaxoSmithKline.                                                                                                 |                                                                                                                                                                         |                                                                                                                                                                                                                                                                                                                                                                                                                                                                                              |                                                            |  |                                                                                                                                                            |  |  |  |  |  |
| Medical writing support was provided by Casmira Brazaitis, PhD, of Fishawack Indicia Ltd, UK, part of Fishawack Health, and was funded by GlaxoSmithKline. |                                                                                                                                                                         |                                                                                                                                                                                                                                                                                                                                                                                                                                                                                              |                                                            |  |                                                                                                                                                            |  |  |  |  |  |
|                                                                                                                                                            |                                                                                                                                                                         |                                                                                                                                                                                                                                                                                                                                                                                                                                                                                              |                                                            |  |                                                                                                                                                            |  |  |  |  |  |
|                                                                                                                                                            |                                                                                                                                                                         |                                                                                                                                                                                                                                                                                                                                                                                                                                                                                              |                                                            |  |                                                                                                                                                            |  |  |  |  |  |
| Time frame: past 36 months                                                                                                                                 |                                                                                                                                                                         |                                                                                                                                                                                                                                                                                                                                                                                                                                                                                              |                                                            |  |                                                                                                                                                            |  |  |  |  |  |
| 2                                                                                                                                                          | Grants or contracts from any entity (if not indicated in item #1 above).                                                                                                | <input type="checkbox"/> <b>None</b> <table border="1" style="width: 100%; margin-top: 10px;"> <tr> <td style="width: 60%;"> </td> <td style="width: 40%;"> </td> </tr> <tr> <td style="text-align: center;">Research grant support from GSK</td> <td></td> </tr> <tr> <td> </td> <td> </td> </tr> </table>                                                                                                                                                                                  |                                                            |  | Research grant support from GSK                                                                                                                            |  |  |  |  |  |
|                                                                                                                                                            |                                                                                                                                                                         |                                                                                                                                                                                                                                                                                                                                                                                                                                                                                              |                                                            |  |                                                                                                                                                            |  |  |  |  |  |
| Research grant support from GSK                                                                                                                            |                                                                                                                                                                         |                                                                                                                                                                                                                                                                                                                                                                                                                                                                                              |                                                            |  |                                                                                                                                                            |  |  |  |  |  |
|                                                                                                                                                            |                                                                                                                                                                         |                                                                                                                                                                                                                                                                                                                                                                                                                                                                                              |                                                            |  |                                                                                                                                                            |  |  |  |  |  |



|   |                                                                                                              | Name all entities with whom you have this relationship or indicate none (add rows as needed) | Specifications/Comments (e.g., if payments were made to you or to your institution) |
|---|--------------------------------------------------------------------------------------------------------------|----------------------------------------------------------------------------------------------|-------------------------------------------------------------------------------------|
| 3 | Royalties or licenses                                                                                        | <input checked="" type="checkbox"/> None                                                     |                                                                                     |
| 4 | Consulting fees                                                                                              | <input checked="" type="checkbox"/> None                                                     |                                                                                     |
| 5 | Payment or honoraria for lectures, presentations, speakers bureaus, manuscript writing or educational events | <input type="checkbox"/> None                                                                | Speaker bureau member for GSK                                                       |
| 6 | Payment for expert testimony                                                                                 | <input checked="" type="checkbox"/> None                                                     |                                                                                     |
| 7 | Support for attending meetings and/or travel                                                                 | <input checked="" type="checkbox"/> None                                                     |                                                                                     |
| 8 | Patents planned, issued or pending                                                                           | <input checked="" type="checkbox"/> None                                                     |                                                                                     |
| 9 | Participation on a Data Safety Monitoring Board or Advisory Board                                            | <input type="checkbox"/> None                                                                | Advisory board member for GSK, AstraZeneca, Eli Lilly, and UCB                      |

|           |                                                                                                   | Name all entities with whom you have this relationship or indicate none (add rows as needed)                                                                                                                                                                                                                         | Specifications/Comments (e.g., if payments were made to you or to your institution) |  |  |  |  |  |  |
|-----------|---------------------------------------------------------------------------------------------------|----------------------------------------------------------------------------------------------------------------------------------------------------------------------------------------------------------------------------------------------------------------------------------------------------------------------|-------------------------------------------------------------------------------------|--|--|--|--|--|--|
| <b>10</b> | Leadership or fiduciary role in other board, society, committee or advocacy group, paid or unpaid | <input checked="" type="checkbox"/> <b>None</b><br><table border="1" style="width: 100%; border-collapse: collapse;"> <tr><td style="width: 50%; height: 20px;"></td><td style="width: 50%;"></td></tr> <tr><td style="height: 20px;"></td><td></td></tr> <tr><td style="height: 20px;"></td><td></td></tr> </table> |                                                                                     |  |  |  |  |  |  |
|           |                                                                                                   |                                                                                                                                                                                                                                                                                                                      |                                                                                     |  |  |  |  |  |  |
|           |                                                                                                   |                                                                                                                                                                                                                                                                                                                      |                                                                                     |  |  |  |  |  |  |
|           |                                                                                                   |                                                                                                                                                                                                                                                                                                                      |                                                                                     |  |  |  |  |  |  |
| <b>11</b> | Stock or stock options                                                                            | <input checked="" type="checkbox"/> <b>None</b><br><table border="1" style="width: 100%; border-collapse: collapse;"> <tr><td style="width: 50%; height: 20px;"></td><td style="width: 50%;"></td></tr> <tr><td style="height: 20px;"></td><td></td></tr> <tr><td style="height: 20px;"></td><td></td></tr> </table> |                                                                                     |  |  |  |  |  |  |
|           |                                                                                                   |                                                                                                                                                                                                                                                                                                                      |                                                                                     |  |  |  |  |  |  |
|           |                                                                                                   |                                                                                                                                                                                                                                                                                                                      |                                                                                     |  |  |  |  |  |  |
|           |                                                                                                   |                                                                                                                                                                                                                                                                                                                      |                                                                                     |  |  |  |  |  |  |
| <b>12</b> | Receipt of equipment, materials, drugs, medical writing, gifts or other services                  | <input checked="" type="checkbox"/> <b>None</b><br><table border="1" style="width: 100%; border-collapse: collapse;"> <tr><td style="width: 50%; height: 20px;"></td><td style="width: 50%;"></td></tr> <tr><td style="height: 20px;"></td><td></td></tr> <tr><td style="height: 20px;"></td><td></td></tr> </table> |                                                                                     |  |  |  |  |  |  |
|           |                                                                                                   |                                                                                                                                                                                                                                                                                                                      |                                                                                     |  |  |  |  |  |  |
|           |                                                                                                   |                                                                                                                                                                                                                                                                                                                      |                                                                                     |  |  |  |  |  |  |
|           |                                                                                                   |                                                                                                                                                                                                                                                                                                                      |                                                                                     |  |  |  |  |  |  |
| <b>13</b> | Other financial or non-financial interests                                                        | <input checked="" type="checkbox"/> <b>None</b><br><table border="1" style="width: 100%; border-collapse: collapse;"> <tr><td style="width: 50%; height: 20px;"></td><td style="width: 50%;"></td></tr> <tr><td style="height: 20px;"></td><td></td></tr> <tr><td style="height: 20px;"></td><td></td></tr> </table> |                                                                                     |  |  |  |  |  |  |
|           |                                                                                                   |                                                                                                                                                                                                                                                                                                                      |                                                                                     |  |  |  |  |  |  |
|           |                                                                                                   |                                                                                                                                                                                                                                                                                                                      |                                                                                     |  |  |  |  |  |  |
|           |                                                                                                   |                                                                                                                                                                                                                                                                                                                      |                                                                                     |  |  |  |  |  |  |

**Please place an "X" next to the following statement to indicate your agreement:**

I certify that I have answered every question and have not altered the wording of any of the questions on this form.

## foxicMJE DISCLOSURE FORM

**Date:** 3/22/2022

**Your Name:** Norma Lynn Fox

**Manuscript Title:** Impact of belimumab on organ damage in systemic lupus erythematosus

**Manuscript Number (if known):** ACR-21-0855.R1

In the interest of transparency, we ask you to disclose all relationships/activities/interests listed below that are related to the content of your manuscript. "Related" means any relation with for-profit or not-for-profit third parties whose interests may be affected by the content of the manuscript. Disclosure represents a commitment to transparency and does not necessarily indicate a bias. If you are in doubt about whether to list a relationship/activity/interest, it is preferable that you do so.

The following questions apply to the author's relationships/activities/interests as they relate to the current manuscript only.

The author's relationships/activities/interests should be defined broadly. For example, if your manuscript pertains to the epidemiology of hypertension, you should declare all relationships with manufacturers of antihypertensive medication, even if that medication is not mentioned in the manuscript.

In item #1 below, report all support for the work reported in this manuscript without time limit. For all other items, the time frame for disclosure is the past 36 months.

|                                                                                                                                                            | Name all entities with whom you have this relationship or indicate none (add rows as needed)                                                                            | Specifications/Comments (e.g., if payments were made to you or to your institution)                                                                                                                                                                                                                                                                                                                                                                                                          |                                                            |  |                                                                                                                                                            |  |  |  |  |  |
|------------------------------------------------------------------------------------------------------------------------------------------------------------|-------------------------------------------------------------------------------------------------------------------------------------------------------------------------|----------------------------------------------------------------------------------------------------------------------------------------------------------------------------------------------------------------------------------------------------------------------------------------------------------------------------------------------------------------------------------------------------------------------------------------------------------------------------------------------|------------------------------------------------------------|--|------------------------------------------------------------------------------------------------------------------------------------------------------------|--|--|--|--|--|
| Time frame: Since the initial planning of the work                                                                                                         |                                                                                                                                                                         |                                                                                                                                                                                                                                                                                                                                                                                                                                                                                              |                                                            |  |                                                                                                                                                            |  |  |  |  |  |
| 1                                                                                                                                                          | All support for the present manuscript (e.g., funding, provision of study materials, medical writing, article processing charges, etc.)<br>No time limit for this item. | <input type="checkbox"/> None <table border="1" style="width: 100%; margin-top: 10px;"> <tr> <td style="width: 60%;">Funding for this research was provided by GlaxoSmithKline.</td> <td style="width: 40%;"></td> </tr> <tr> <td>Medical writing support was provided by Casmira Brazaitis, PhD, of Fishawack Indicia Ltd, UK, part of Fishawack Health, and was funded by GlaxoSmithKline.</td> <td></td> </tr> <tr> <td> </td> <td> </td> </tr> <tr> <td> </td> <td> </td> </tr> </table> | Funding for this research was provided by GlaxoSmithKline. |  | Medical writing support was provided by Casmira Brazaitis, PhD, of Fishawack Indicia Ltd, UK, part of Fishawack Health, and was funded by GlaxoSmithKline. |  |  |  |  |  |
| Funding for this research was provided by GlaxoSmithKline.                                                                                                 |                                                                                                                                                                         |                                                                                                                                                                                                                                                                                                                                                                                                                                                                                              |                                                            |  |                                                                                                                                                            |  |  |  |  |  |
| Medical writing support was provided by Casmira Brazaitis, PhD, of Fishawack Indicia Ltd, UK, part of Fishawack Health, and was funded by GlaxoSmithKline. |                                                                                                                                                                         |                                                                                                                                                                                                                                                                                                                                                                                                                                                                                              |                                                            |  |                                                                                                                                                            |  |  |  |  |  |
|                                                                                                                                                            |                                                                                                                                                                         |                                                                                                                                                                                                                                                                                                                                                                                                                                                                                              |                                                            |  |                                                                                                                                                            |  |  |  |  |  |
|                                                                                                                                                            |                                                                                                                                                                         |                                                                                                                                                                                                                                                                                                                                                                                                                                                                                              |                                                            |  |                                                                                                                                                            |  |  |  |  |  |
| Time frame: past 36 months                                                                                                                                 |                                                                                                                                                                         |                                                                                                                                                                                                                                                                                                                                                                                                                                                                                              |                                                            |  |                                                                                                                                                            |  |  |  |  |  |
| 2                                                                                                                                                          | Grants or contracts from any entity (if not indicated in item #1 above).                                                                                                | <input checked="" type="checkbox"/> <b>None</b> <table border="1" style="width: 100%; margin-top: 10px;"> <tr> <td style="width: 60%;"> </td> <td style="width: 40%;"> </td> </tr> <tr> <td> </td> <td> </td> </tr> <tr> <td> </td> <td> </td> </tr> </table>                                                                                                                                                                                                                                |                                                            |  |                                                                                                                                                            |  |  |  |  |  |
|                                                                                                                                                            |                                                                                                                                                                         |                                                                                                                                                                                                                                                                                                                                                                                                                                                                                              |                                                            |  |                                                                                                                                                            |  |  |  |  |  |
|                                                                                                                                                            |                                                                                                                                                                         |                                                                                                                                                                                                                                                                                                                                                                                                                                                                                              |                                                            |  |                                                                                                                                                            |  |  |  |  |  |
|                                                                                                                                                            |                                                                                                                                                                         |                                                                                                                                                                                                                                                                                                                                                                                                                                                                                              |                                                            |  |                                                                                                                                                            |  |  |  |  |  |

|    |                                                                                                              | Name all entities with whom you have this relationship or indicate none (add rows as needed) | Specifications/Comments (e.g., if payments were made to you or to your institution)                                                         |  |  |  |  |  |  |  |  |
|----|--------------------------------------------------------------------------------------------------------------|----------------------------------------------------------------------------------------------|---------------------------------------------------------------------------------------------------------------------------------------------|--|--|--|--|--|--|--|--|
| 3  | Royalties or licenses                                                                                        | <input checked="" type="checkbox"/> None                                                     |                                                                                                                                             |  |  |  |  |  |  |  |  |
| 4  | Consulting fees                                                                                              | <input checked="" type="checkbox"/> None                                                     | <table border="1"> <tr><td></td><td></td></tr> <tr><td></td><td></td></tr> <tr><td></td><td></td></tr> <tr><td></td><td></td></tr> </table> |  |  |  |  |  |  |  |  |
|    |                                                                                                              |                                                                                              |                                                                                                                                             |  |  |  |  |  |  |  |  |
|    |                                                                                                              |                                                                                              |                                                                                                                                             |  |  |  |  |  |  |  |  |
|    |                                                                                                              |                                                                                              |                                                                                                                                             |  |  |  |  |  |  |  |  |
|    |                                                                                                              |                                                                                              |                                                                                                                                             |  |  |  |  |  |  |  |  |
| 5  | Payment or honoraria for lectures, presentations, speakers bureaus, manuscript writing or educational events | <input checked="" type="checkbox"/> None                                                     |                                                                                                                                             |  |  |  |  |  |  |  |  |
| 6  | Payment for expert testimony                                                                                 | <input checked="" type="checkbox"/> None                                                     | <table border="1"> <tr><td></td><td></td></tr> <tr><td></td><td></td></tr> <tr><td></td><td></td></tr> </table>                             |  |  |  |  |  |  |  |  |
|    |                                                                                                              |                                                                                              |                                                                                                                                             |  |  |  |  |  |  |  |  |
|    |                                                                                                              |                                                                                              |                                                                                                                                             |  |  |  |  |  |  |  |  |
|    |                                                                                                              |                                                                                              |                                                                                                                                             |  |  |  |  |  |  |  |  |
| 7  | Support for attending meetings and/or travel                                                                 | <input checked="" type="checkbox"/> None                                                     | <table border="1"> <tr><td></td><td></td></tr> <tr><td></td><td></td></tr> <tr><td></td><td></td></tr> </table>                             |  |  |  |  |  |  |  |  |
|    |                                                                                                              |                                                                                              |                                                                                                                                             |  |  |  |  |  |  |  |  |
|    |                                                                                                              |                                                                                              |                                                                                                                                             |  |  |  |  |  |  |  |  |
|    |                                                                                                              |                                                                                              |                                                                                                                                             |  |  |  |  |  |  |  |  |
| 8  | Patents planned, issued or pending                                                                           | <input checked="" type="checkbox"/> None                                                     | <table border="1"> <tr><td></td><td></td></tr> <tr><td></td><td></td></tr> <tr><td></td><td></td></tr> </table>                             |  |  |  |  |  |  |  |  |
|    |                                                                                                              |                                                                                              |                                                                                                                                             |  |  |  |  |  |  |  |  |
|    |                                                                                                              |                                                                                              |                                                                                                                                             |  |  |  |  |  |  |  |  |
|    |                                                                                                              |                                                                                              |                                                                                                                                             |  |  |  |  |  |  |  |  |
| 9  | Participation on a Data Safety Monitoring Board or Advisory Board                                            | <input checked="" type="checkbox"/> None                                                     | <table border="1"> <tr><td></td><td></td></tr> <tr><td></td><td></td></tr> <tr><td></td><td></td></tr> </table>                             |  |  |  |  |  |  |  |  |
|    |                                                                                                              |                                                                                              |                                                                                                                                             |  |  |  |  |  |  |  |  |
|    |                                                                                                              |                                                                                              |                                                                                                                                             |  |  |  |  |  |  |  |  |
|    |                                                                                                              |                                                                                              |                                                                                                                                             |  |  |  |  |  |  |  |  |
| 10 | Leadership or fiduciary role in                                                                              | <input checked="" type="checkbox"/> None                                                     |                                                                                                                                             |  |  |  |  |  |  |  |  |

|                                                                                          |                                                                                  | Name all entities with whom you have this relationship or indicate none (add rows as needed)                                                                                                                                                            | Specifications/Comments (e.g., if payments were made to you or to your institution)      |  |  |  |  |  |                                                                                                                       |  |  |  |  |  |  |
|------------------------------------------------------------------------------------------|----------------------------------------------------------------------------------|---------------------------------------------------------------------------------------------------------------------------------------------------------------------------------------------------------------------------------------------------------|------------------------------------------------------------------------------------------|--|--|--|--|--|-----------------------------------------------------------------------------------------------------------------------|--|--|--|--|--|--|
|                                                                                          | other board, society, committee or advocacy group, paid or unpaid                | <table border="1"> <tr><td> </td><td> </td></tr> <tr><td> </td><td> </td></tr> <tr><td> </td><td> </td></tr> </table>                                                                                                                                   |                                                                                          |  |  |  |  |  | <table border="1"> <tr><td> </td><td> </td></tr> <tr><td> </td><td> </td></tr> <tr><td> </td><td> </td></tr> </table> |  |  |  |  |  |  |
|                                                                                          |                                                                                  |                                                                                                                                                                                                                                                         |                                                                                          |  |  |  |  |  |                                                                                                                       |  |  |  |  |  |  |
|                                                                                          |                                                                                  |                                                                                                                                                                                                                                                         |                                                                                          |  |  |  |  |  |                                                                                                                       |  |  |  |  |  |  |
|                                                                                          |                                                                                  |                                                                                                                                                                                                                                                         |                                                                                          |  |  |  |  |  |                                                                                                                       |  |  |  |  |  |  |
|                                                                                          |                                                                                  |                                                                                                                                                                                                                                                         |                                                                                          |  |  |  |  |  |                                                                                                                       |  |  |  |  |  |  |
|                                                                                          |                                                                                  |                                                                                                                                                                                                                                                         |                                                                                          |  |  |  |  |  |                                                                                                                       |  |  |  |  |  |  |
|                                                                                          |                                                                                  |                                                                                                                                                                                                                                                         |                                                                                          |  |  |  |  |  |                                                                                                                       |  |  |  |  |  |  |
| <b>11</b>                                                                                | Stock or stock options                                                           | <input type="checkbox"/> <b>None</b><br><table border="1"> <tr> <td>Holds stocks and shares in GlaxoSmithKline at the time of the manuscript being initiated</td> <td> </td> </tr> <tr><td> </td><td> </td></tr> <tr><td> </td><td> </td></tr> </table> | Holds stocks and shares in GlaxoSmithKline at the time of the manuscript being initiated |  |  |  |  |  | <table border="1"> <tr><td> </td><td> </td></tr> <tr><td> </td><td> </td></tr> <tr><td> </td><td> </td></tr> </table> |  |  |  |  |  |  |
| Holds stocks and shares in GlaxoSmithKline at the time of the manuscript being initiated |                                                                                  |                                                                                                                                                                                                                                                         |                                                                                          |  |  |  |  |  |                                                                                                                       |  |  |  |  |  |  |
|                                                                                          |                                                                                  |                                                                                                                                                                                                                                                         |                                                                                          |  |  |  |  |  |                                                                                                                       |  |  |  |  |  |  |
|                                                                                          |                                                                                  |                                                                                                                                                                                                                                                         |                                                                                          |  |  |  |  |  |                                                                                                                       |  |  |  |  |  |  |
|                                                                                          |                                                                                  |                                                                                                                                                                                                                                                         |                                                                                          |  |  |  |  |  |                                                                                                                       |  |  |  |  |  |  |
|                                                                                          |                                                                                  |                                                                                                                                                                                                                                                         |                                                                                          |  |  |  |  |  |                                                                                                                       |  |  |  |  |  |  |
|                                                                                          |                                                                                  |                                                                                                                                                                                                                                                         |                                                                                          |  |  |  |  |  |                                                                                                                       |  |  |  |  |  |  |
| <b>12</b>                                                                                | Receipt of equipment, materials, drugs, medical writing, gifts or other services | <input checked="" type="checkbox"/> <b>None</b><br><table border="1"> <tr><td> </td><td> </td></tr> <tr><td> </td><td> </td></tr> <tr><td> </td><td> </td></tr> </table>                                                                                |                                                                                          |  |  |  |  |  | <table border="1"> <tr><td> </td><td> </td></tr> <tr><td> </td><td> </td></tr> <tr><td> </td><td> </td></tr> </table> |  |  |  |  |  |  |
|                                                                                          |                                                                                  |                                                                                                                                                                                                                                                         |                                                                                          |  |  |  |  |  |                                                                                                                       |  |  |  |  |  |  |
|                                                                                          |                                                                                  |                                                                                                                                                                                                                                                         |                                                                                          |  |  |  |  |  |                                                                                                                       |  |  |  |  |  |  |
|                                                                                          |                                                                                  |                                                                                                                                                                                                                                                         |                                                                                          |  |  |  |  |  |                                                                                                                       |  |  |  |  |  |  |
|                                                                                          |                                                                                  |                                                                                                                                                                                                                                                         |                                                                                          |  |  |  |  |  |                                                                                                                       |  |  |  |  |  |  |
|                                                                                          |                                                                                  |                                                                                                                                                                                                                                                         |                                                                                          |  |  |  |  |  |                                                                                                                       |  |  |  |  |  |  |
|                                                                                          |                                                                                  |                                                                                                                                                                                                                                                         |                                                                                          |  |  |  |  |  |                                                                                                                       |  |  |  |  |  |  |
| <b>13</b>                                                                                | Other financial or non-financial interests                                       | <input type="checkbox"/> <b>None</b><br><table border="1"> <tr> <td>Employee of GlaxoSmithKline at the time of this manuscript being initiated</td> <td> </td> </tr> <tr><td> </td><td> </td></tr> <tr><td> </td><td> </td></tr> </table>               | Employee of GlaxoSmithKline at the time of this manuscript being initiated               |  |  |  |  |  | <table border="1"> <tr><td> </td><td> </td></tr> <tr><td> </td><td> </td></tr> <tr><td> </td><td> </td></tr> </table> |  |  |  |  |  |  |
| Employee of GlaxoSmithKline at the time of this manuscript being initiated               |                                                                                  |                                                                                                                                                                                                                                                         |                                                                                          |  |  |  |  |  |                                                                                                                       |  |  |  |  |  |  |
|                                                                                          |                                                                                  |                                                                                                                                                                                                                                                         |                                                                                          |  |  |  |  |  |                                                                                                                       |  |  |  |  |  |  |
|                                                                                          |                                                                                  |                                                                                                                                                                                                                                                         |                                                                                          |  |  |  |  |  |                                                                                                                       |  |  |  |  |  |  |
|                                                                                          |                                                                                  |                                                                                                                                                                                                                                                         |                                                                                          |  |  |  |  |  |                                                                                                                       |  |  |  |  |  |  |
|                                                                                          |                                                                                  |                                                                                                                                                                                                                                                         |                                                                                          |  |  |  |  |  |                                                                                                                       |  |  |  |  |  |  |
|                                                                                          |                                                                                  |                                                                                                                                                                                                                                                         |                                                                                          |  |  |  |  |  |                                                                                                                       |  |  |  |  |  |  |

Please place an "X" next to the following statement to indicate your agreement:

I certify that I have answered every question and have not altered the wording of any of the questions on this form.

## ICMJE DISCLOSURE FORM

**Date:** 3/22/2022

**Your Name:** Richard Furie

**Manuscript Title:** Impact of belimumab on organ damage in systemic lupus erythematosus

**Manuscript Number (if known):** ACR-21-0855.R1

In the interest of transparency, we ask you to disclose all relationships/activities/interests listed below that are related to the content of your manuscript. "Related" means any relation with for-profit or not-for-profit third parties whose interests may be affected by the content of the manuscript. Disclosure represents a commitment to transparency and does not necessarily indicate a bias. If you are in doubt about whether to list a relationship/activity/interest, it is preferable that you do so.

The following questions apply to the author's relationships/activities/interests as they relate to the current manuscript only.

The author's relationships/activities/interests should be defined broadly. For example, if your manuscript pertains to the epidemiology of hypertension, you should declare all relationships with manufacturers of antihypertensive medication, even if that medication is not mentioned in the manuscript.

In item #1 below, report all support for the work reported in this manuscript without time limit. For all other items, the time frame for disclosure is the past 36 months.

|                                                                                                                                                            | Name all entities with whom you have this relationship or indicate none (add rows as needed)                                                                            | Specifications/Comments (e.g., if payments were made to you or to your institution)                                                                                                                                                                                                                                                                                                                                                                                                                                                                                                                                             |                                                            |  |                                                                                                                                                            |  |  |  |  |  |
|------------------------------------------------------------------------------------------------------------------------------------------------------------|-------------------------------------------------------------------------------------------------------------------------------------------------------------------------|---------------------------------------------------------------------------------------------------------------------------------------------------------------------------------------------------------------------------------------------------------------------------------------------------------------------------------------------------------------------------------------------------------------------------------------------------------------------------------------------------------------------------------------------------------------------------------------------------------------------------------|------------------------------------------------------------|--|------------------------------------------------------------------------------------------------------------------------------------------------------------|--|--|--|--|--|
| Time frame: Since the initial planning of the work                                                                                                         |                                                                                                                                                                         |                                                                                                                                                                                                                                                                                                                                                                                                                                                                                                                                                                                                                                 |                                                            |  |                                                                                                                                                            |  |  |  |  |  |
| 1                                                                                                                                                          | All support for the present manuscript (e.g., funding, provision of study materials, medical writing, article processing charges, etc.)<br>No time limit for this item. | <input type="checkbox"/> None<br><br><table border="1" style="width: 100%; border-collapse: collapse;"> <tr> <td style="width: 60%;">Funding for this research was provided by GlaxoSmithKline.</td> <td style="width: 40%;"></td> </tr> <tr> <td>Medical writing support was provided by Casmira Brazaitis, PhD, of Fishawack Indicia Ltd, UK, part of Fishawack Health, and was funded by GlaxoSmithKline.</td> <td></td> </tr> <tr> <td> </td> <td> </td> </tr> <tr> <td> </td> <td> </td> </tr> </table> <div style="text-align: right; font-size: small; margin-top: 5px;">Click the tab key to add additional rows.</div> | Funding for this research was provided by GlaxoSmithKline. |  | Medical writing support was provided by Casmira Brazaitis, PhD, of Fishawack Indicia Ltd, UK, part of Fishawack Health, and was funded by GlaxoSmithKline. |  |  |  |  |  |
| Funding for this research was provided by GlaxoSmithKline.                                                                                                 |                                                                                                                                                                         |                                                                                                                                                                                                                                                                                                                                                                                                                                                                                                                                                                                                                                 |                                                            |  |                                                                                                                                                            |  |  |  |  |  |
| Medical writing support was provided by Casmira Brazaitis, PhD, of Fishawack Indicia Ltd, UK, part of Fishawack Health, and was funded by GlaxoSmithKline. |                                                                                                                                                                         |                                                                                                                                                                                                                                                                                                                                                                                                                                                                                                                                                                                                                                 |                                                            |  |                                                                                                                                                            |  |  |  |  |  |
|                                                                                                                                                            |                                                                                                                                                                         |                                                                                                                                                                                                                                                                                                                                                                                                                                                                                                                                                                                                                                 |                                                            |  |                                                                                                                                                            |  |  |  |  |  |
|                                                                                                                                                            |                                                                                                                                                                         |                                                                                                                                                                                                                                                                                                                                                                                                                                                                                                                                                                                                                                 |                                                            |  |                                                                                                                                                            |  |  |  |  |  |
| Time frame: past 36 months                                                                                                                                 |                                                                                                                                                                         |                                                                                                                                                                                                                                                                                                                                                                                                                                                                                                                                                                                                                                 |                                                            |  |                                                                                                                                                            |  |  |  |  |  |
| 2                                                                                                                                                          | Grants or contracts from any entity (if not indicated in item #1 above).                                                                                                | <input checked="" type="checkbox"/> <b>None</b><br><br><table border="1" style="width: 100%; border-collapse: collapse;"> <tr> <td style="width: 60%; height: 20px;"> </td> <td style="width: 40%;"> </td> </tr> <tr> <td style="height: 20px;"> </td> <td> </td> </tr> <tr> <td style="height: 20px;"> </td> <td> </td> </tr> </table>                                                                                                                                                                                                                                                                                         |                                                            |  |                                                                                                                                                            |  |  |  |  |  |
|                                                                                                                                                            |                                                                                                                                                                         |                                                                                                                                                                                                                                                                                                                                                                                                                                                                                                                                                                                                                                 |                                                            |  |                                                                                                                                                            |  |  |  |  |  |
|                                                                                                                                                            |                                                                                                                                                                         |                                                                                                                                                                                                                                                                                                                                                                                                                                                                                                                                                                                                                                 |                                                            |  |                                                                                                                                                            |  |  |  |  |  |
|                                                                                                                                                            |                                                                                                                                                                         |                                                                                                                                                                                                                                                                                                                                                                                                                                                                                                                                                                                                                                 |                                                            |  |                                                                                                                                                            |  |  |  |  |  |

|                          |                                                                                                              | Name all entities with whom you have this relationship or indicate none (add rows as needed) | Specifications/Comments (e.g., if payments were made to you or to your institution)                                                                                             |                          |  |  |  |  |  |  |  |
|--------------------------|--------------------------------------------------------------------------------------------------------------|----------------------------------------------------------------------------------------------|---------------------------------------------------------------------------------------------------------------------------------------------------------------------------------|--------------------------|--|--|--|--|--|--|--|
| 3                        | Royalties or licenses                                                                                        | <input checked="" type="checkbox"/> None                                                     |                                                                                                                                                                                 |                          |  |  |  |  |  |  |  |
| 4                        | Consulting fees                                                                                              | <input type="checkbox"/> None                                                                | <table border="1"> <tr> <td>Consulting fees from GSK</td> <td></td> </tr> <tr> <td></td> <td></td> </tr> <tr> <td></td> <td></td> </tr> <tr> <td></td> <td></td> </tr> </table> | Consulting fees from GSK |  |  |  |  |  |  |  |
| Consulting fees from GSK |                                                                                                              |                                                                                              |                                                                                                                                                                                 |                          |  |  |  |  |  |  |  |
|                          |                                                                                                              |                                                                                              |                                                                                                                                                                                 |                          |  |  |  |  |  |  |  |
|                          |                                                                                                              |                                                                                              |                                                                                                                                                                                 |                          |  |  |  |  |  |  |  |
|                          |                                                                                                              |                                                                                              |                                                                                                                                                                                 |                          |  |  |  |  |  |  |  |
| 5                        | Payment or honoraria for lectures, presentations, speakers bureaus, manuscript writing or educational events | <input checked="" type="checkbox"/> None                                                     |                                                                                                                                                                                 |                          |  |  |  |  |  |  |  |
| 6                        | Payment for expert testimony                                                                                 | <input checked="" type="checkbox"/> None                                                     | <table border="1"> <tr> <td></td> <td></td> </tr> <tr> <td></td> <td></td> </tr> <tr> <td></td> <td></td> </tr> </table>                                                        |                          |  |  |  |  |  |  |  |
|                          |                                                                                                              |                                                                                              |                                                                                                                                                                                 |                          |  |  |  |  |  |  |  |
|                          |                                                                                                              |                                                                                              |                                                                                                                                                                                 |                          |  |  |  |  |  |  |  |
|                          |                                                                                                              |                                                                                              |                                                                                                                                                                                 |                          |  |  |  |  |  |  |  |
| 7                        | Support for attending meetings and/or travel                                                                 | <input checked="" type="checkbox"/> None                                                     | <table border="1"> <tr> <td></td> <td></td> </tr> <tr> <td></td> <td></td> </tr> <tr> <td></td> <td></td> </tr> </table>                                                        |                          |  |  |  |  |  |  |  |
|                          |                                                                                                              |                                                                                              |                                                                                                                                                                                 |                          |  |  |  |  |  |  |  |
|                          |                                                                                                              |                                                                                              |                                                                                                                                                                                 |                          |  |  |  |  |  |  |  |
|                          |                                                                                                              |                                                                                              |                                                                                                                                                                                 |                          |  |  |  |  |  |  |  |
| 8                        | Patents planned, issued or pending                                                                           | <input checked="" type="checkbox"/> None                                                     | <table border="1"> <tr> <td></td> <td></td> </tr> <tr> <td></td> <td></td> </tr> <tr> <td></td> <td></td> </tr> </table>                                                        |                          |  |  |  |  |  |  |  |
|                          |                                                                                                              |                                                                                              |                                                                                                                                                                                 |                          |  |  |  |  |  |  |  |
|                          |                                                                                                              |                                                                                              |                                                                                                                                                                                 |                          |  |  |  |  |  |  |  |
|                          |                                                                                                              |                                                                                              |                                                                                                                                                                                 |                          |  |  |  |  |  |  |  |
| 9                        | Participation on a Data Safety Monitoring Board or Advisory Board                                            | <input checked="" type="checkbox"/> None                                                     | <table border="1"> <tr> <td></td> <td></td> </tr> <tr> <td></td> <td></td> </tr> <tr> <td></td> <td></td> </tr> </table>                                                        |                          |  |  |  |  |  |  |  |
|                          |                                                                                                              |                                                                                              |                                                                                                                                                                                 |                          |  |  |  |  |  |  |  |
|                          |                                                                                                              |                                                                                              |                                                                                                                                                                                 |                          |  |  |  |  |  |  |  |
|                          |                                                                                                              |                                                                                              |                                                                                                                                                                                 |                          |  |  |  |  |  |  |  |
| 10                       | Leadership or fiduciary role in                                                                              | <input checked="" type="checkbox"/> None                                                     |                                                                                                                                                                                 |                          |  |  |  |  |  |  |  |

|                           |                                                                                  | Name all entities with whom you have this relationship or indicate none (add rows as needed)                                                                                     | Specifications/Comments (e.g., if payments were made to you or to your institution) |  |  |  |  |  |                                                                                                                 |  |  |  |  |  |  |
|---------------------------|----------------------------------------------------------------------------------|----------------------------------------------------------------------------------------------------------------------------------------------------------------------------------|-------------------------------------------------------------------------------------|--|--|--|--|--|-----------------------------------------------------------------------------------------------------------------|--|--|--|--|--|--|
|                           | other board, society, committee or advocacy group, paid or unpaid                | <table border="1"> <tr><td></td><td></td></tr> <tr><td></td><td></td></tr> <tr><td></td><td></td></tr> </table>                                                                  |                                                                                     |  |  |  |  |  | <table border="1"> <tr><td></td><td></td></tr> <tr><td></td><td></td></tr> <tr><td></td><td></td></tr> </table> |  |  |  |  |  |  |
|                           |                                                                                  |                                                                                                                                                                                  |                                                                                     |  |  |  |  |  |                                                                                                                 |  |  |  |  |  |  |
|                           |                                                                                  |                                                                                                                                                                                  |                                                                                     |  |  |  |  |  |                                                                                                                 |  |  |  |  |  |  |
|                           |                                                                                  |                                                                                                                                                                                  |                                                                                     |  |  |  |  |  |                                                                                                                 |  |  |  |  |  |  |
|                           |                                                                                  |                                                                                                                                                                                  |                                                                                     |  |  |  |  |  |                                                                                                                 |  |  |  |  |  |  |
|                           |                                                                                  |                                                                                                                                                                                  |                                                                                     |  |  |  |  |  |                                                                                                                 |  |  |  |  |  |  |
|                           |                                                                                  |                                                                                                                                                                                  |                                                                                     |  |  |  |  |  |                                                                                                                 |  |  |  |  |  |  |
| <b>11</b>                 | Stock or stock options                                                           | <input checked="" type="checkbox"/> <b>None</b><br><table border="1"> <tr><td></td><td></td></tr> <tr><td></td><td></td></tr> <tr><td></td><td></td></tr> </table>               |                                                                                     |  |  |  |  |  | <table border="1"> <tr><td></td><td></td></tr> <tr><td></td><td></td></tr> <tr><td></td><td></td></tr> </table> |  |  |  |  |  |  |
|                           |                                                                                  |                                                                                                                                                                                  |                                                                                     |  |  |  |  |  |                                                                                                                 |  |  |  |  |  |  |
|                           |                                                                                  |                                                                                                                                                                                  |                                                                                     |  |  |  |  |  |                                                                                                                 |  |  |  |  |  |  |
|                           |                                                                                  |                                                                                                                                                                                  |                                                                                     |  |  |  |  |  |                                                                                                                 |  |  |  |  |  |  |
|                           |                                                                                  |                                                                                                                                                                                  |                                                                                     |  |  |  |  |  |                                                                                                                 |  |  |  |  |  |  |
|                           |                                                                                  |                                                                                                                                                                                  |                                                                                     |  |  |  |  |  |                                                                                                                 |  |  |  |  |  |  |
|                           |                                                                                  |                                                                                                                                                                                  |                                                                                     |  |  |  |  |  |                                                                                                                 |  |  |  |  |  |  |
| <b>12</b>                 | Receipt of equipment, materials, drugs, medical writing, gifts or other services | <input checked="" type="checkbox"/> <b>None</b><br><table border="1"> <tr><td></td><td></td></tr> <tr><td></td><td></td></tr> <tr><td></td><td></td></tr> </table>               |                                                                                     |  |  |  |  |  | <table border="1"> <tr><td></td><td></td></tr> <tr><td></td><td></td></tr> <tr><td></td><td></td></tr> </table> |  |  |  |  |  |  |
|                           |                                                                                  |                                                                                                                                                                                  |                                                                                     |  |  |  |  |  |                                                                                                                 |  |  |  |  |  |  |
|                           |                                                                                  |                                                                                                                                                                                  |                                                                                     |  |  |  |  |  |                                                                                                                 |  |  |  |  |  |  |
|                           |                                                                                  |                                                                                                                                                                                  |                                                                                     |  |  |  |  |  |                                                                                                                 |  |  |  |  |  |  |
|                           |                                                                                  |                                                                                                                                                                                  |                                                                                     |  |  |  |  |  |                                                                                                                 |  |  |  |  |  |  |
|                           |                                                                                  |                                                                                                                                                                                  |                                                                                     |  |  |  |  |  |                                                                                                                 |  |  |  |  |  |  |
|                           |                                                                                  |                                                                                                                                                                                  |                                                                                     |  |  |  |  |  |                                                                                                                 |  |  |  |  |  |  |
| <b>13</b>                 | Other financial or non-financial interests                                       | <input type="checkbox"/> <b>None</b><br><table border="1"> <tr><td>Research support from GSK</td><td></td></tr> <tr><td></td><td></td></tr> <tr><td></td><td></td></tr> </table> | Research support from GSK                                                           |  |  |  |  |  | <table border="1"> <tr><td></td><td></td></tr> <tr><td></td><td></td></tr> <tr><td></td><td></td></tr> </table> |  |  |  |  |  |  |
| Research support from GSK |                                                                                  |                                                                                                                                                                                  |                                                                                     |  |  |  |  |  |                                                                                                                 |  |  |  |  |  |  |
|                           |                                                                                  |                                                                                                                                                                                  |                                                                                     |  |  |  |  |  |                                                                                                                 |  |  |  |  |  |  |
|                           |                                                                                  |                                                                                                                                                                                  |                                                                                     |  |  |  |  |  |                                                                                                                 |  |  |  |  |  |  |
|                           |                                                                                  |                                                                                                                                                                                  |                                                                                     |  |  |  |  |  |                                                                                                                 |  |  |  |  |  |  |
|                           |                                                                                  |                                                                                                                                                                                  |                                                                                     |  |  |  |  |  |                                                                                                                 |  |  |  |  |  |  |
|                           |                                                                                  |                                                                                                                                                                                  |                                                                                     |  |  |  |  |  |                                                                                                                 |  |  |  |  |  |  |

Please place an "X" next to the following statement to indicate your agreement:

I certify that I have answered every question and have not altered the wording of any of the questions on this form.



## ICMJE DISCLOSURE FORM

**Date:** 3/22/2022

**Your Name:** Roger A. Levy

**Manuscript Title:** Impact of belimumab on organ damage in systemic lupus erythematosus

**Manuscript Number (if known):** ACR-21-0855.R1

In the interest of transparency, we ask you to disclose all relationships/activities/interests listed below that are related to the content of your manuscript. "Related" means any relation with for-profit or not-for-profit third parties whose interests may be affected by the content of the manuscript. Disclosure represents a commitment to transparency and does not necessarily indicate a bias. If you are in doubt about whether to list a relationship/activity/interest, it is preferable that you do so.

The following questions apply to the author's relationships/activities/interests as they relate to the current manuscript only.

The author's relationships/activities/interests should be defined broadly. For example, if your manuscript pertains to the epidemiology of hypertension, you should declare all relationships with manufacturers of antihypertensive medication, even if that medication is not mentioned in the manuscript.

In item #1 below, report all support for the work reported in this manuscript without time limit. For all other items, the time frame for disclosure is the past 36 months.

|                                                                                                                                                            | Name all entities with whom you have this relationship or indicate none (add rows as needed)                                                                            | Specifications/Comments (e.g., if payments were made to you or to your institution)                                                                                                                                                                                                                                                                                                                                                                                                          |                                                            |  |                                                                                                                                                            |  |  |  |  |  |
|------------------------------------------------------------------------------------------------------------------------------------------------------------|-------------------------------------------------------------------------------------------------------------------------------------------------------------------------|----------------------------------------------------------------------------------------------------------------------------------------------------------------------------------------------------------------------------------------------------------------------------------------------------------------------------------------------------------------------------------------------------------------------------------------------------------------------------------------------|------------------------------------------------------------|--|------------------------------------------------------------------------------------------------------------------------------------------------------------|--|--|--|--|--|
| Time frame: Since the initial planning of the work                                                                                                         |                                                                                                                                                                         |                                                                                                                                                                                                                                                                                                                                                                                                                                                                                              |                                                            |  |                                                                                                                                                            |  |  |  |  |  |
| 1                                                                                                                                                          | All support for the present manuscript (e.g., funding, provision of study materials, medical writing, article processing charges, etc.)<br>No time limit for this item. | <input type="checkbox"/> None <table border="1" style="width: 100%; margin-top: 10px;"> <tr> <td style="width: 60%;">Funding for this research was provided by GlaxoSmithKline.</td> <td style="width: 40%;"></td> </tr> <tr> <td>Medical writing support was provided by Casmira Brazaitis, PhD, of Fishawack Indicia Ltd, UK, part of Fishawack Health, and was funded by GlaxoSmithKline.</td> <td></td> </tr> <tr> <td> </td> <td> </td> </tr> <tr> <td> </td> <td> </td> </tr> </table> | Funding for this research was provided by GlaxoSmithKline. |  | Medical writing support was provided by Casmira Brazaitis, PhD, of Fishawack Indicia Ltd, UK, part of Fishawack Health, and was funded by GlaxoSmithKline. |  |  |  |  |  |
| Funding for this research was provided by GlaxoSmithKline.                                                                                                 |                                                                                                                                                                         |                                                                                                                                                                                                                                                                                                                                                                                                                                                                                              |                                                            |  |                                                                                                                                                            |  |  |  |  |  |
| Medical writing support was provided by Casmira Brazaitis, PhD, of Fishawack Indicia Ltd, UK, part of Fishawack Health, and was funded by GlaxoSmithKline. |                                                                                                                                                                         |                                                                                                                                                                                                                                                                                                                                                                                                                                                                                              |                                                            |  |                                                                                                                                                            |  |  |  |  |  |
|                                                                                                                                                            |                                                                                                                                                                         |                                                                                                                                                                                                                                                                                                                                                                                                                                                                                              |                                                            |  |                                                                                                                                                            |  |  |  |  |  |
|                                                                                                                                                            |                                                                                                                                                                         |                                                                                                                                                                                                                                                                                                                                                                                                                                                                                              |                                                            |  |                                                                                                                                                            |  |  |  |  |  |
| Time frame: past 36 months                                                                                                                                 |                                                                                                                                                                         |                                                                                                                                                                                                                                                                                                                                                                                                                                                                                              |                                                            |  |                                                                                                                                                            |  |  |  |  |  |
| 2                                                                                                                                                          | Grants or contracts from any entity (if not indicated in item #1 above).                                                                                                | <input checked="" type="checkbox"/> <b>None</b> <table border="1" style="width: 100%; margin-top: 10px;"> <tr> <td style="width: 60%; height: 20px;"> </td> <td style="width: 40%;"> </td> </tr> <tr> <td style="height: 20px;"> </td> <td> </td> </tr> <tr> <td style="height: 20px;"> </td> <td> </td> </tr> </table>                                                                                                                                                                      |                                                            |  |                                                                                                                                                            |  |  |  |  |  |
|                                                                                                                                                            |                                                                                                                                                                         |                                                                                                                                                                                                                                                                                                                                                                                                                                                                                              |                                                            |  |                                                                                                                                                            |  |  |  |  |  |
|                                                                                                                                                            |                                                                                                                                                                         |                                                                                                                                                                                                                                                                                                                                                                                                                                                                                              |                                                            |  |                                                                                                                                                            |  |  |  |  |  |
|                                                                                                                                                            |                                                                                                                                                                         |                                                                                                                                                                                                                                                                                                                                                                                                                                                                                              |                                                            |  |                                                                                                                                                            |  |  |  |  |  |

|    |                                                                                                              | Name all entities with whom you have this relationship or indicate none (add rows as needed) | Specifications/Comments (e.g., if payments were made to you or to your institution)                                                         |  |  |  |  |  |  |  |  |
|----|--------------------------------------------------------------------------------------------------------------|----------------------------------------------------------------------------------------------|---------------------------------------------------------------------------------------------------------------------------------------------|--|--|--|--|--|--|--|--|
| 3  | Royalties or licenses                                                                                        | <input checked="" type="checkbox"/> None                                                     |                                                                                                                                             |  |  |  |  |  |  |  |  |
| 4  | Consulting fees                                                                                              | <input checked="" type="checkbox"/> None                                                     | <table border="1"> <tr><td></td><td></td></tr> <tr><td></td><td></td></tr> <tr><td></td><td></td></tr> <tr><td></td><td></td></tr> </table> |  |  |  |  |  |  |  |  |
|    |                                                                                                              |                                                                                              |                                                                                                                                             |  |  |  |  |  |  |  |  |
|    |                                                                                                              |                                                                                              |                                                                                                                                             |  |  |  |  |  |  |  |  |
|    |                                                                                                              |                                                                                              |                                                                                                                                             |  |  |  |  |  |  |  |  |
|    |                                                                                                              |                                                                                              |                                                                                                                                             |  |  |  |  |  |  |  |  |
| 5  | Payment or honoraria for lectures, presentations, speakers bureaus, manuscript writing or educational events | <input checked="" type="checkbox"/> None                                                     |                                                                                                                                             |  |  |  |  |  |  |  |  |
| 6  | Payment for expert testimony                                                                                 | <input checked="" type="checkbox"/> None                                                     | <table border="1"> <tr><td></td><td></td></tr> <tr><td></td><td></td></tr> <tr><td></td><td></td></tr> </table>                             |  |  |  |  |  |  |  |  |
|    |                                                                                                              |                                                                                              |                                                                                                                                             |  |  |  |  |  |  |  |  |
|    |                                                                                                              |                                                                                              |                                                                                                                                             |  |  |  |  |  |  |  |  |
|    |                                                                                                              |                                                                                              |                                                                                                                                             |  |  |  |  |  |  |  |  |
| 7  | Support for attending meetings and/or travel                                                                 | <input checked="" type="checkbox"/> None                                                     | <table border="1"> <tr><td></td><td></td></tr> <tr><td></td><td></td></tr> <tr><td></td><td></td></tr> </table>                             |  |  |  |  |  |  |  |  |
|    |                                                                                                              |                                                                                              |                                                                                                                                             |  |  |  |  |  |  |  |  |
|    |                                                                                                              |                                                                                              |                                                                                                                                             |  |  |  |  |  |  |  |  |
|    |                                                                                                              |                                                                                              |                                                                                                                                             |  |  |  |  |  |  |  |  |
| 8  | Patents planned, issued or pending                                                                           | <input checked="" type="checkbox"/> None                                                     | <table border="1"> <tr><td></td><td></td></tr> <tr><td></td><td></td></tr> <tr><td></td><td></td></tr> </table>                             |  |  |  |  |  |  |  |  |
|    |                                                                                                              |                                                                                              |                                                                                                                                             |  |  |  |  |  |  |  |  |
|    |                                                                                                              |                                                                                              |                                                                                                                                             |  |  |  |  |  |  |  |  |
|    |                                                                                                              |                                                                                              |                                                                                                                                             |  |  |  |  |  |  |  |  |
| 9  | Participation on a Data Safety Monitoring Board or Advisory Board                                            | <input checked="" type="checkbox"/> None                                                     | <table border="1"> <tr><td></td><td></td></tr> <tr><td></td><td></td></tr> <tr><td></td><td></td></tr> </table>                             |  |  |  |  |  |  |  |  |
|    |                                                                                                              |                                                                                              |                                                                                                                                             |  |  |  |  |  |  |  |  |
|    |                                                                                                              |                                                                                              |                                                                                                                                             |  |  |  |  |  |  |  |  |
|    |                                                                                                              |                                                                                              |                                                                                                                                             |  |  |  |  |  |  |  |  |
| 10 | Leadership or fiduciary role in                                                                              | <input checked="" type="checkbox"/> None                                                     |                                                                                                                                             |  |  |  |  |  |  |  |  |

|           |                                                                                  | Name all entities with whom you have this relationship or indicate none (add rows as needed) | Specifications/Comments (e.g., if payments were made to you or to your institution) |
|-----------|----------------------------------------------------------------------------------|----------------------------------------------------------------------------------------------|-------------------------------------------------------------------------------------|
|           | other board, society, committee or advocacy group, paid or unpaid                | <input type="checkbox"/>                                                                     |                                                                                     |
| <b>11</b> | Stock or stock options                                                           | <input type="checkbox"/> <b>None</b>                                                         |                                                                                     |
|           |                                                                                  | Holds stocks and shares in GlaxoSmithKline                                                   |                                                                                     |
|           |                                                                                  |                                                                                              |                                                                                     |
| <b>12</b> | Receipt of equipment, materials, drugs, medical writing, gifts or other services | <input checked="" type="checkbox"/> <b>None</b>                                              |                                                                                     |
|           |                                                                                  |                                                                                              |                                                                                     |
| <b>13</b> | Other financial or non-financial interests                                       | <input type="checkbox"/> <b>None</b>                                                         |                                                                                     |
|           |                                                                                  | Employee of GlaxoSmithKline                                                                  |                                                                                     |
|           |                                                                                  |                                                                                              |                                                                                     |

Please place an "X" next to the following statement to indicate your agreement:

I certify that I have answered every question and have not altered the wording of any of the questions on this form.

## ICMJE DISCLOSURE FORM

**Date:** 3/22/2022

**Your Name:** Ronald van Vollenhoven

**Manuscript Title:** Impact of belimumab on organ damage in systemic lupus erythematosus

**Manuscript Number (if known):** ACR-21-0855.R1

In the interest of transparency, we ask you to disclose all relationships/activities/interests listed below that are related to the content of your manuscript. "Related" means any relation with for-profit or not-for-profit third parties whose interests may be affected by the content of the manuscript. Disclosure represents a commitment to transparency and does not necessarily indicate a bias. If you are in doubt about whether to list a relationship/activity/interest, it is preferable that you do so.

The following questions apply to the author's relationships/activities/interests as they relate to the current manuscript only.

The author's relationships/activities/interests should be defined broadly. For example, if your manuscript pertains to the epidemiology of hypertension, you should declare all relationships with manufacturers of antihypertensive medication, even if that medication is not mentioned in the manuscript.

In item #1 below, report all support for the work reported in this manuscript without time limit. For all other items, the time frame for disclosure is the past 36 months.

|                                                                                                                                                            | Name all entities with whom you have this relationship or indicate none (add rows as needed)                                                                            | Specifications/Comments (e.g., if payments were made to you or to your institution)                                                                                                                                                                                                                                                                                                                                                                                                                                    |                                                                                 |  |                                                                                                                                                            |  |  |  |  |  |
|------------------------------------------------------------------------------------------------------------------------------------------------------------|-------------------------------------------------------------------------------------------------------------------------------------------------------------------------|------------------------------------------------------------------------------------------------------------------------------------------------------------------------------------------------------------------------------------------------------------------------------------------------------------------------------------------------------------------------------------------------------------------------------------------------------------------------------------------------------------------------|---------------------------------------------------------------------------------|--|------------------------------------------------------------------------------------------------------------------------------------------------------------|--|--|--|--|--|
| Time frame: Since the initial planning of the work                                                                                                         |                                                                                                                                                                         |                                                                                                                                                                                                                                                                                                                                                                                                                                                                                                                        |                                                                                 |  |                                                                                                                                                            |  |  |  |  |  |
| 1                                                                                                                                                          | All support for the present manuscript (e.g., funding, provision of study materials, medical writing, article processing charges, etc.)<br>No time limit for this item. | <input type="checkbox"/> None <table border="1" style="width: 100%; border-collapse: collapse; margin-top: 5px;"> <tr> <td style="width: 60%;">Funding for this research was provided by GlaxoSmithKline.</td> <td style="width: 40%;"></td> </tr> <tr> <td>Medical writing support was provided by Casmira Brazaitis, PhD, of Fishawack Indicia Ltd, UK, part of Fishawack Health, and was funded by GlaxoSmithKline.</td> <td></td> </tr> <tr> <td> </td> <td> </td> </tr> <tr> <td> </td> <td> </td> </tr> </table> | Funding for this research was provided by GlaxoSmithKline.                      |  | Medical writing support was provided by Casmira Brazaitis, PhD, of Fishawack Indicia Ltd, UK, part of Fishawack Health, and was funded by GlaxoSmithKline. |  |  |  |  |  |
| Funding for this research was provided by GlaxoSmithKline.                                                                                                 |                                                                                                                                                                         |                                                                                                                                                                                                                                                                                                                                                                                                                                                                                                                        |                                                                                 |  |                                                                                                                                                            |  |  |  |  |  |
| Medical writing support was provided by Casmira Brazaitis, PhD, of Fishawack Indicia Ltd, UK, part of Fishawack Health, and was funded by GlaxoSmithKline. |                                                                                                                                                                         |                                                                                                                                                                                                                                                                                                                                                                                                                                                                                                                        |                                                                                 |  |                                                                                                                                                            |  |  |  |  |  |
|                                                                                                                                                            |                                                                                                                                                                         |                                                                                                                                                                                                                                                                                                                                                                                                                                                                                                                        |                                                                                 |  |                                                                                                                                                            |  |  |  |  |  |
|                                                                                                                                                            |                                                                                                                                                                         |                                                                                                                                                                                                                                                                                                                                                                                                                                                                                                                        |                                                                                 |  |                                                                                                                                                            |  |  |  |  |  |
| Time frame: past 36 months                                                                                                                                 |                                                                                                                                                                         |                                                                                                                                                                                                                                                                                                                                                                                                                                                                                                                        |                                                                                 |  |                                                                                                                                                            |  |  |  |  |  |
| 2                                                                                                                                                          | Grants or contracts from any entity (if not indicated in item #1 above).                                                                                                | <input type="checkbox"/> <b>None</b> <table border="1" style="width: 100%; border-collapse: collapse; margin-top: 5px;"> <tr> <td style="width: 60%;">Support for educational programs and institutional grants from Pfizer and Roche</td> <td style="width: 40%;"></td> </tr> <tr> <td> </td> <td> </td> </tr> <tr> <td> </td> <td> </td> </tr> </table>                                                                                                                                                              | Support for educational programs and institutional grants from Pfizer and Roche |  |                                                                                                                                                            |  |  |  |  |  |
| Support for educational programs and institutional grants from Pfizer and Roche                                                                            |                                                                                                                                                                         |                                                                                                                                                                                                                                                                                                                                                                                                                                                                                                                        |                                                                                 |  |                                                                                                                                                            |  |  |  |  |  |
|                                                                                                                                                            |                                                                                                                                                                         |                                                                                                                                                                                                                                                                                                                                                                                                                                                                                                                        |                                                                                 |  |                                                                                                                                                            |  |  |  |  |  |
|                                                                                                                                                            |                                                                                                                                                                         |                                                                                                                                                                                                                                                                                                                                                                                                                                                                                                                        |                                                                                 |  |                                                                                                                                                            |  |  |  |  |  |

|   |                                                                                                              | Name all entities with whom you have this relationship or indicate none (add rows as needed)                                       | Specifications/Comments (e.g., if payments were made to you or to your institution) |
|---|--------------------------------------------------------------------------------------------------------------|------------------------------------------------------------------------------------------------------------------------------------|-------------------------------------------------------------------------------------|
| 3 | Royalties or licenses                                                                                        | <input checked="" type="checkbox"/> <b>None</b>                                                                                    |                                                                                     |
| 4 | Consulting fees                                                                                              | <input type="checkbox"/> <b>None</b>                                                                                               |                                                                                     |
|   |                                                                                                              | Consulting fees from AbbVie, AstraZeneca, Biogen, Biotest, BMS, Galapagos, Gilead, Janssen, Pfizer, Sanofi, Servier, UCB, Vielabio |                                                                                     |
|   |                                                                                                              |                                                                                                                                    |                                                                                     |
|   |                                                                                                              |                                                                                                                                    |                                                                                     |
| 5 | Payment or honoraria for lectures, presentations, speakers bureaus, manuscript writing or educational events | <input type="checkbox"/> <b>None</b>                                                                                               |                                                                                     |
|   |                                                                                                              | Speaker honoraria from AbbVie, Galapagos, GSK, Janssen, Pfizer, UCB                                                                |                                                                                     |
|   |                                                                                                              |                                                                                                                                    |                                                                                     |
|   |                                                                                                              |                                                                                                                                    |                                                                                     |
| 6 | Payment for expert testimony                                                                                 | <input checked="" type="checkbox"/> <b>None</b>                                                                                    |                                                                                     |
|   |                                                                                                              |                                                                                                                                    |                                                                                     |
|   |                                                                                                              |                                                                                                                                    |                                                                                     |
| 7 | Support for attending meetings and/or travel                                                                 | <input checked="" type="checkbox"/> <b>None</b>                                                                                    |                                                                                     |
|   |                                                                                                              |                                                                                                                                    |                                                                                     |
|   |                                                                                                              |                                                                                                                                    |                                                                                     |
| 8 | Patents planned, issued or pending                                                                           | <input checked="" type="checkbox"/> <b>None</b>                                                                                    |                                                                                     |
|   |                                                                                                              |                                                                                                                                    |                                                                                     |
|   |                                                                                                              |                                                                                                                                    |                                                                                     |
| 9 | Participation on a Data Safety Monitoring Board or Advisory Board                                            | <input checked="" type="checkbox"/> <b>None</b>                                                                                    |                                                                                     |
|   |                                                                                                              |                                                                                                                                    |                                                                                     |
|   |                                                                                                              |                                                                                                                                    |                                                                                     |

|           |                                                                                                   | Name all entities with whom you have this relationship or indicate none (add rows as needed)                                                                                                                                                                                                                         | Specifications/Comments (e.g., if payments were made to you or to your institution) |  |  |  |  |  |  |
|-----------|---------------------------------------------------------------------------------------------------|----------------------------------------------------------------------------------------------------------------------------------------------------------------------------------------------------------------------------------------------------------------------------------------------------------------------|-------------------------------------------------------------------------------------|--|--|--|--|--|--|
| <b>10</b> | Leadership or fiduciary role in other board, society, committee or advocacy group, paid or unpaid | <input checked="" type="checkbox"/> <b>None</b><br><table border="1" style="width: 100%; border-collapse: collapse;"> <tr><td style="width: 50%; height: 20px;"></td><td style="width: 50%;"></td></tr> <tr><td style="height: 20px;"></td><td></td></tr> <tr><td style="height: 20px;"></td><td></td></tr> </table> |                                                                                     |  |  |  |  |  |  |
|           |                                                                                                   |                                                                                                                                                                                                                                                                                                                      |                                                                                     |  |  |  |  |  |  |
|           |                                                                                                   |                                                                                                                                                                                                                                                                                                                      |                                                                                     |  |  |  |  |  |  |
|           |                                                                                                   |                                                                                                                                                                                                                                                                                                                      |                                                                                     |  |  |  |  |  |  |
| <b>11</b> | Stock or stock options                                                                            | <input checked="" type="checkbox"/> <b>None</b><br><table border="1" style="width: 100%; border-collapse: collapse;"> <tr><td style="width: 50%; height: 20px;"></td><td style="width: 50%;"></td></tr> <tr><td style="height: 20px;"></td><td></td></tr> <tr><td style="height: 20px;"></td><td></td></tr> </table> |                                                                                     |  |  |  |  |  |  |
|           |                                                                                                   |                                                                                                                                                                                                                                                                                                                      |                                                                                     |  |  |  |  |  |  |
|           |                                                                                                   |                                                                                                                                                                                                                                                                                                                      |                                                                                     |  |  |  |  |  |  |
|           |                                                                                                   |                                                                                                                                                                                                                                                                                                                      |                                                                                     |  |  |  |  |  |  |
| <b>12</b> | Receipt of equipment, materials, drugs, medical writing, gifts or other services                  | <input checked="" type="checkbox"/> <b>None</b><br><table border="1" style="width: 100%; border-collapse: collapse;"> <tr><td style="width: 50%; height: 20px;"></td><td style="width: 50%;"></td></tr> <tr><td style="height: 20px;"></td><td></td></tr> <tr><td style="height: 20px;"></td><td></td></tr> </table> |                                                                                     |  |  |  |  |  |  |
|           |                                                                                                   |                                                                                                                                                                                                                                                                                                                      |                                                                                     |  |  |  |  |  |  |
|           |                                                                                                   |                                                                                                                                                                                                                                                                                                                      |                                                                                     |  |  |  |  |  |  |
|           |                                                                                                   |                                                                                                                                                                                                                                                                                                                      |                                                                                     |  |  |  |  |  |  |
| <b>13</b> | Other financial or non-financial interests                                                        | <input checked="" type="checkbox"/> <b>None</b><br><table border="1" style="width: 100%; border-collapse: collapse;"> <tr><td style="width: 50%; height: 20px;"></td><td style="width: 50%;"></td></tr> <tr><td style="height: 20px;"></td><td></td></tr> <tr><td style="height: 20px;"></td><td></td></tr> </table> |                                                                                     |  |  |  |  |  |  |
|           |                                                                                                   |                                                                                                                                                                                                                                                                                                                      |                                                                                     |  |  |  |  |  |  |
|           |                                                                                                   |                                                                                                                                                                                                                                                                                                                      |                                                                                     |  |  |  |  |  |  |
|           |                                                                                                   |                                                                                                                                                                                                                                                                                                                      |                                                                                     |  |  |  |  |  |  |

**Please place an "X" next to the following statement to indicate your agreement:**

I certify that I have answered every question and have not altered the wording of any of the questions on this form.

## ICMJE DISCLOSURE FORM

**Date:** 3/22/2022

**Your Name:** Tania Gonzalez-Rivera

**Manuscript Title:** Impact of belimumab on organ damage in systemic lupus erythematosus

**Manuscript Number (if known):** ACR-21-0855.R1

In the interest of transparency, we ask you to disclose all relationships/activities/interests listed below that are related to the content of your manuscript. "Related" means any relation with for-profit or not-for-profit third parties whose interests may be affected by the content of the manuscript. Disclosure represents a commitment to transparency and does not necessarily indicate a bias. If you are in doubt about whether to list a relationship/activity/interest, it is preferable that you do so.

The following questions apply to the author's relationships/activities/interests as they relate to the current manuscript only.

The author's relationships/activities/interests should be defined broadly. For example, if your manuscript pertains to the epidemiology of hypertension, you should declare all relationships with manufacturers of antihypertensive medication, even if that medication is not mentioned in the manuscript.

In item #1 below, report all support for the work reported in this manuscript without time limit. For all other items, the time frame for disclosure is the past 36 months.

|                                                                                                                                                            | Name all entities with whom you have this relationship or indicate none (add rows as needed)                                                                            | Specifications/Comments (e.g., if payments were made to you or to your institution)                                                                                                                                                                                                                                                                                                                                                                                                                                                                                                                                             |                                                            |  |                                                                                                                                                            |  |  |  |  |  |
|------------------------------------------------------------------------------------------------------------------------------------------------------------|-------------------------------------------------------------------------------------------------------------------------------------------------------------------------|---------------------------------------------------------------------------------------------------------------------------------------------------------------------------------------------------------------------------------------------------------------------------------------------------------------------------------------------------------------------------------------------------------------------------------------------------------------------------------------------------------------------------------------------------------------------------------------------------------------------------------|------------------------------------------------------------|--|------------------------------------------------------------------------------------------------------------------------------------------------------------|--|--|--|--|--|
| Time frame: Since the initial planning of the work                                                                                                         |                                                                                                                                                                         |                                                                                                                                                                                                                                                                                                                                                                                                                                                                                                                                                                                                                                 |                                                            |  |                                                                                                                                                            |  |  |  |  |  |
| 1                                                                                                                                                          | All support for the present manuscript (e.g., funding, provision of study materials, medical writing, article processing charges, etc.)<br>No time limit for this item. | <input type="checkbox"/> None<br><br><table border="1" style="width: 100%; border-collapse: collapse;"> <tr> <td style="width: 60%;">Funding for this research was provided by GlaxoSmithKline.</td> <td style="width: 40%;"></td> </tr> <tr> <td>Medical writing support was provided by Casmira Brazaitis, PhD, of Fishawack Indicia Ltd, UK, part of Fishawack Health, and was funded by GlaxoSmithKline.</td> <td></td> </tr> <tr> <td> </td> <td> </td> </tr> <tr> <td> </td> <td> </td> </tr> </table> <div style="text-align: right; font-size: small; margin-top: 5px;">Click the tab key to add additional rows.</div> | Funding for this research was provided by GlaxoSmithKline. |  | Medical writing support was provided by Casmira Brazaitis, PhD, of Fishawack Indicia Ltd, UK, part of Fishawack Health, and was funded by GlaxoSmithKline. |  |  |  |  |  |
| Funding for this research was provided by GlaxoSmithKline.                                                                                                 |                                                                                                                                                                         |                                                                                                                                                                                                                                                                                                                                                                                                                                                                                                                                                                                                                                 |                                                            |  |                                                                                                                                                            |  |  |  |  |  |
| Medical writing support was provided by Casmira Brazaitis, PhD, of Fishawack Indicia Ltd, UK, part of Fishawack Health, and was funded by GlaxoSmithKline. |                                                                                                                                                                         |                                                                                                                                                                                                                                                                                                                                                                                                                                                                                                                                                                                                                                 |                                                            |  |                                                                                                                                                            |  |  |  |  |  |
|                                                                                                                                                            |                                                                                                                                                                         |                                                                                                                                                                                                                                                                                                                                                                                                                                                                                                                                                                                                                                 |                                                            |  |                                                                                                                                                            |  |  |  |  |  |
|                                                                                                                                                            |                                                                                                                                                                         |                                                                                                                                                                                                                                                                                                                                                                                                                                                                                                                                                                                                                                 |                                                            |  |                                                                                                                                                            |  |  |  |  |  |
| Time frame: past 36 months                                                                                                                                 |                                                                                                                                                                         |                                                                                                                                                                                                                                                                                                                                                                                                                                                                                                                                                                                                                                 |                                                            |  |                                                                                                                                                            |  |  |  |  |  |
| 2                                                                                                                                                          | Grants or contracts from any entity (if not indicated in item #1 above).                                                                                                | <input checked="" type="checkbox"/> <b>None</b><br><br><table border="1" style="width: 100%; border-collapse: collapse;"> <tr> <td style="width: 60%; height: 20px;"> </td> <td style="width: 40%;"> </td> </tr> <tr> <td style="height: 20px;"> </td> <td> </td> </tr> <tr> <td style="height: 20px;"> </td> <td> </td> </tr> </table>                                                                                                                                                                                                                                                                                         |                                                            |  |                                                                                                                                                            |  |  |  |  |  |
|                                                                                                                                                            |                                                                                                                                                                         |                                                                                                                                                                                                                                                                                                                                                                                                                                                                                                                                                                                                                                 |                                                            |  |                                                                                                                                                            |  |  |  |  |  |
|                                                                                                                                                            |                                                                                                                                                                         |                                                                                                                                                                                                                                                                                                                                                                                                                                                                                                                                                                                                                                 |                                                            |  |                                                                                                                                                            |  |  |  |  |  |
|                                                                                                                                                            |                                                                                                                                                                         |                                                                                                                                                                                                                                                                                                                                                                                                                                                                                                                                                                                                                                 |                                                            |  |                                                                                                                                                            |  |  |  |  |  |

|           |                                                                                                              | Name all entities with whom you have this relationship or indicate none (add rows as needed) | Specifications/Comments (e.g., if payments were made to you or to your institution)                                                         |  |  |  |  |  |  |  |  |
|-----------|--------------------------------------------------------------------------------------------------------------|----------------------------------------------------------------------------------------------|---------------------------------------------------------------------------------------------------------------------------------------------|--|--|--|--|--|--|--|--|
| <b>3</b>  | Royalties or licenses                                                                                        | <input checked="" type="checkbox"/> <b>None</b>                                              |                                                                                                                                             |  |  |  |  |  |  |  |  |
| <b>4</b>  | Consulting fees                                                                                              | <input checked="" type="checkbox"/> <b>None</b>                                              | <table border="1"> <tr><td></td><td></td></tr> <tr><td></td><td></td></tr> <tr><td></td><td></td></tr> <tr><td></td><td></td></tr> </table> |  |  |  |  |  |  |  |  |
|           |                                                                                                              |                                                                                              |                                                                                                                                             |  |  |  |  |  |  |  |  |
|           |                                                                                                              |                                                                                              |                                                                                                                                             |  |  |  |  |  |  |  |  |
|           |                                                                                                              |                                                                                              |                                                                                                                                             |  |  |  |  |  |  |  |  |
|           |                                                                                                              |                                                                                              |                                                                                                                                             |  |  |  |  |  |  |  |  |
| <b>5</b>  | Payment or honoraria for lectures, presentations, speakers bureaus, manuscript writing or educational events | <input checked="" type="checkbox"/> <b>None</b>                                              |                                                                                                                                             |  |  |  |  |  |  |  |  |
| <b>6</b>  | Payment for expert testimony                                                                                 | <input checked="" type="checkbox"/> <b>None</b>                                              | <table border="1"> <tr><td></td><td></td></tr> <tr><td></td><td></td></tr> <tr><td></td><td></td></tr> </table>                             |  |  |  |  |  |  |  |  |
|           |                                                                                                              |                                                                                              |                                                                                                                                             |  |  |  |  |  |  |  |  |
|           |                                                                                                              |                                                                                              |                                                                                                                                             |  |  |  |  |  |  |  |  |
|           |                                                                                                              |                                                                                              |                                                                                                                                             |  |  |  |  |  |  |  |  |
| <b>7</b>  | Support for attending meetings and/or travel                                                                 | <input checked="" type="checkbox"/> <b>None</b>                                              | <table border="1"> <tr><td></td><td></td></tr> <tr><td></td><td></td></tr> <tr><td></td><td></td></tr> </table>                             |  |  |  |  |  |  |  |  |
|           |                                                                                                              |                                                                                              |                                                                                                                                             |  |  |  |  |  |  |  |  |
|           |                                                                                                              |                                                                                              |                                                                                                                                             |  |  |  |  |  |  |  |  |
|           |                                                                                                              |                                                                                              |                                                                                                                                             |  |  |  |  |  |  |  |  |
| <b>8</b>  | Patents planned, issued or pending                                                                           | <input checked="" type="checkbox"/> <b>None</b>                                              | <table border="1"> <tr><td></td><td></td></tr> <tr><td></td><td></td></tr> <tr><td></td><td></td></tr> </table>                             |  |  |  |  |  |  |  |  |
|           |                                                                                                              |                                                                                              |                                                                                                                                             |  |  |  |  |  |  |  |  |
|           |                                                                                                              |                                                                                              |                                                                                                                                             |  |  |  |  |  |  |  |  |
|           |                                                                                                              |                                                                                              |                                                                                                                                             |  |  |  |  |  |  |  |  |
| <b>9</b>  | Participation on a Data Safety Monitoring Board or Advisory Board                                            | <input checked="" type="checkbox"/> <b>None</b>                                              | <table border="1"> <tr><td></td><td></td></tr> <tr><td></td><td></td></tr> <tr><td></td><td></td></tr> </table>                             |  |  |  |  |  |  |  |  |
|           |                                                                                                              |                                                                                              |                                                                                                                                             |  |  |  |  |  |  |  |  |
|           |                                                                                                              |                                                                                              |                                                                                                                                             |  |  |  |  |  |  |  |  |
|           |                                                                                                              |                                                                                              |                                                                                                                                             |  |  |  |  |  |  |  |  |
| <b>10</b> | Leadership or fiduciary role in other board,                                                                 | <input checked="" type="checkbox"/> <b>None</b>                                              | <table border="1"> <tr><td></td><td></td></tr> </table>                                                                                     |  |  |  |  |  |  |  |  |
|           |                                                                                                              |                                                                                              |                                                                                                                                             |  |  |  |  |  |  |  |  |



|                                                                                     |                                                                                  | Name all entities with whom you have this relationship or indicate none (add rows as needed)                                                                                                                                                        | Specifications/Comments (e.g., if payments were made to you or to your institution) |  |  |  |  |  |  |
|-------------------------------------------------------------------------------------|----------------------------------------------------------------------------------|-----------------------------------------------------------------------------------------------------------------------------------------------------------------------------------------------------------------------------------------------------|-------------------------------------------------------------------------------------|--|--|--|--|--|--|
|                                                                                     | society, committee or advocacy group, paid or unpaid                             |                                                                                                                                                                                                                                                     |                                                                                     |  |  |  |  |  |  |
| <b>11</b>                                                                           | Stock or stock options                                                           | <input type="checkbox"/> <b>None</b><br><table border="1"> <tr> <td>Held stocks and shares in GlaxoSmithKline at the time this manuscript was initiated</td> <td></td> </tr> <tr> <td></td> <td></td> </tr> <tr> <td></td> <td></td> </tr> </table> | Held stocks and shares in GlaxoSmithKline at the time this manuscript was initiated |  |  |  |  |  |  |
| Held stocks and shares in GlaxoSmithKline at the time this manuscript was initiated |                                                                                  |                                                                                                                                                                                                                                                     |                                                                                     |  |  |  |  |  |  |
|                                                                                     |                                                                                  |                                                                                                                                                                                                                                                     |                                                                                     |  |  |  |  |  |  |
|                                                                                     |                                                                                  |                                                                                                                                                                                                                                                     |                                                                                     |  |  |  |  |  |  |
| <b>12</b>                                                                           | Receipt of equipment, materials, drugs, medical writing, gifts or other services | <input checked="" type="checkbox"/> <b>None</b><br><table border="1"> <tr> <td></td> <td></td> </tr> <tr> <td></td> <td></td> </tr> <tr> <td></td> <td></td> </tr> </table>                                                                         |                                                                                     |  |  |  |  |  |  |
|                                                                                     |                                                                                  |                                                                                                                                                                                                                                                     |                                                                                     |  |  |  |  |  |  |
|                                                                                     |                                                                                  |                                                                                                                                                                                                                                                     |                                                                                     |  |  |  |  |  |  |
|                                                                                     |                                                                                  |                                                                                                                                                                                                                                                     |                                                                                     |  |  |  |  |  |  |
| <b>13</b>                                                                           | Other financial or non-financial interests                                       | <input type="checkbox"/> <b>None</b><br><table border="1"> <tr> <td>Was an employee of GlaxoSmithKline at the time of this manuscript being initiated</td> <td></td> </tr> <tr> <td></td> <td></td> </tr> <tr> <td></td> <td></td> </tr> </table>   | Was an employee of GlaxoSmithKline at the time of this manuscript being initiated   |  |  |  |  |  |  |
| Was an employee of GlaxoSmithKline at the time of this manuscript being initiated   |                                                                                  |                                                                                                                                                                                                                                                     |                                                                                     |  |  |  |  |  |  |
|                                                                                     |                                                                                  |                                                                                                                                                                                                                                                     |                                                                                     |  |  |  |  |  |  |
|                                                                                     |                                                                                  |                                                                                                                                                                                                                                                     |                                                                                     |  |  |  |  |  |  |

Please place an "X" next to the following statement to indicate your agreement:

I certify that I have answered every question and have not altered the wording of any of the questions on this form.

## ICMJE DISCLOSURE FORM

**Date:** 3/22/2022

**Your Name:** William Stohl

**Manuscript Title:** Impact of belimumab on organ damage in systemic lupus erythematosus

**Manuscript Number (if known):** ACR-21-0855.R1

In the interest of transparency, we ask you to disclose all relationships/activities/interests listed below that are related to the content of your manuscript. "Related" means any relation with for-profit or not-for-profit third parties whose interests may be affected by the content of the manuscript. Disclosure represents a commitment to transparency and does not necessarily indicate a bias. If you are in doubt about whether to list a relationship/activity/interest, it is preferable that you do so.

The following questions apply to the author's relationships/activities/interests as they relate to the current manuscript only.

The author's relationships/activities/interests should be defined broadly. For example, if your manuscript pertains to the epidemiology of hypertension, you should declare all relationships with manufacturers of antihypertensive medication, even if that medication is not mentioned in the manuscript.

In item #1 below, report all support for the work reported in this manuscript without time limit. For all other items, the time frame for disclosure is the past 36 months.

|                                                                                                                                                                                                         | Name all entities with whom you have this relationship or indicate none (add rows as needed)                                                                            | Specifications/Comments (e.g., if payments were made to you or to your institution)                                                                                                                                                                                                                                                                                                                                                                                                                                                                                          |                                                            |  |                                                                                                                                                                                                         |  |                                           |  |
|---------------------------------------------------------------------------------------------------------------------------------------------------------------------------------------------------------|-------------------------------------------------------------------------------------------------------------------------------------------------------------------------|------------------------------------------------------------------------------------------------------------------------------------------------------------------------------------------------------------------------------------------------------------------------------------------------------------------------------------------------------------------------------------------------------------------------------------------------------------------------------------------------------------------------------------------------------------------------------|------------------------------------------------------------|--|---------------------------------------------------------------------------------------------------------------------------------------------------------------------------------------------------------|--|-------------------------------------------|--|
| Time frame: Since the initial planning of the work                                                                                                                                                      |                                                                                                                                                                         |                                                                                                                                                                                                                                                                                                                                                                                                                                                                                                                                                                              |                                                            |  |                                                                                                                                                                                                         |  |                                           |  |
| 1                                                                                                                                                                                                       | All support for the present manuscript (e.g., funding, provision of study materials, medical writing, article processing charges, etc.)<br>No time limit for this item. | <input type="checkbox"/> None <table border="1" style="width: 100%; border-collapse: collapse; margin-top: 10px;"> <tr> <td style="width: 60%;">Funding for this research was provided by GlaxoSmithKline.</td> <td style="width: 40%;"></td> </tr> <tr> <td>Medical writing support was provided by Casmira Brazaitis, PhD, of Fishawack Indicia Ltd, UK, part of Fishawack Health, and was funded by GlaxoSmithKline.</td> <td></td> </tr> <tr> <td colspan="2" style="text-align: right; font-size: small;">Click the tab key to add additional rows.</td> </tr> </table> | Funding for this research was provided by GlaxoSmithKline. |  | Medical writing support was provided by Casmira Brazaitis, PhD, of Fishawack Indicia Ltd, UK, part of Fishawack Health, and was funded by GlaxoSmithKline.                                              |  | Click the tab key to add additional rows. |  |
| Funding for this research was provided by GlaxoSmithKline.                                                                                                                                              |                                                                                                                                                                         |                                                                                                                                                                                                                                                                                                                                                                                                                                                                                                                                                                              |                                                            |  |                                                                                                                                                                                                         |  |                                           |  |
| Medical writing support was provided by Casmira Brazaitis, PhD, of Fishawack Indicia Ltd, UK, part of Fishawack Health, and was funded by GlaxoSmithKline.                                              |                                                                                                                                                                         |                                                                                                                                                                                                                                                                                                                                                                                                                                                                                                                                                                              |                                                            |  |                                                                                                                                                                                                         |  |                                           |  |
| Click the tab key to add additional rows.                                                                                                                                                               |                                                                                                                                                                         |                                                                                                                                                                                                                                                                                                                                                                                                                                                                                                                                                                              |                                                            |  |                                                                                                                                                                                                         |  |                                           |  |
| Time frame: past 36 months                                                                                                                                                                              |                                                                                                                                                                         |                                                                                                                                                                                                                                                                                                                                                                                                                                                                                                                                                                              |                                                            |  |                                                                                                                                                                                                         |  |                                           |  |
| 2                                                                                                                                                                                                       | Grants or contracts from any entity (if not indicated in item #1 above).                                                                                                | <input type="checkbox"/> <b>None</b> <table border="1" style="width: 100%; border-collapse: collapse; margin-top: 10px;"> <tr> <td style="width: 60%;">Research grant support from GSK</td> <td style="width: 40%;"></td> </tr> <tr> <td>The USC Clinical Trials Unit is funded in part through grants UL1TR001855 and UL1TR000130 from the National Center for Advancing Translational Science (NCATS) of the US National Institutes of Health.</td> <td></td> </tr> </table>                                                                                               | Research grant support from GSK                            |  | The USC Clinical Trials Unit is funded in part through grants UL1TR001855 and UL1TR000130 from the National Center for Advancing Translational Science (NCATS) of the US National Institutes of Health. |  |                                           |  |
| Research grant support from GSK                                                                                                                                                                         |                                                                                                                                                                         |                                                                                                                                                                                                                                                                                                                                                                                                                                                                                                                                                                              |                                                            |  |                                                                                                                                                                                                         |  |                                           |  |
| The USC Clinical Trials Unit is funded in part through grants UL1TR001855 and UL1TR000130 from the National Center for Advancing Translational Science (NCATS) of the US National Institutes of Health. |                                                                                                                                                                         |                                                                                                                                                                                                                                                                                                                                                                                                                                                                                                                                                                              |                                                            |  |                                                                                                                                                                                                         |  |                                           |  |

|                                      |                                                                                                              | Name all entities with whom you have this relationship or indicate none (add rows as needed) | Specifications/Comments (e.g., if payments were made to you or to your institution)                                                                 |                                      |  |  |  |  |  |
|--------------------------------------|--------------------------------------------------------------------------------------------------------------|----------------------------------------------------------------------------------------------|-----------------------------------------------------------------------------------------------------------------------------------------------------|--------------------------------------|--|--|--|--|--|
| 3                                    | Royalties or licenses                                                                                        | <input checked="" type="checkbox"/> None                                                     |                                                                                                                                                     |                                      |  |  |  |  |  |
| 4                                    | Consulting fees                                                                                              | <input checked="" type="checkbox"/> None                                                     | <table border="1"> <tr><td></td><td></td></tr> <tr><td></td><td></td></tr> <tr><td></td><td></td></tr> </table>                                     |                                      |  |  |  |  |  |
|                                      |                                                                                                              |                                                                                              |                                                                                                                                                     |                                      |  |  |  |  |  |
|                                      |                                                                                                              |                                                                                              |                                                                                                                                                     |                                      |  |  |  |  |  |
|                                      |                                                                                                              |                                                                                              |                                                                                                                                                     |                                      |  |  |  |  |  |
| 5                                    | Payment or honoraria for lectures, presentations, speakers bureaus, manuscript writing or educational events | <input checked="" type="checkbox"/> None                                                     |                                                                                                                                                     |                                      |  |  |  |  |  |
| 6                                    | Payment for expert testimony                                                                                 | <input checked="" type="checkbox"/> None                                                     | <table border="1"> <tr><td></td><td></td></tr> <tr><td></td><td></td></tr> <tr><td></td><td></td></tr> </table>                                     |                                      |  |  |  |  |  |
|                                      |                                                                                                              |                                                                                              |                                                                                                                                                     |                                      |  |  |  |  |  |
|                                      |                                                                                                              |                                                                                              |                                                                                                                                                     |                                      |  |  |  |  |  |
|                                      |                                                                                                              |                                                                                              |                                                                                                                                                     |                                      |  |  |  |  |  |
| 7                                    | Support for attending meetings and/or travel                                                                 | <input checked="" type="checkbox"/> None                                                     | <table border="1"> <tr><td></td><td></td></tr> <tr><td></td><td></td></tr> <tr><td></td><td></td></tr> </table>                                     |                                      |  |  |  |  |  |
|                                      |                                                                                                              |                                                                                              |                                                                                                                                                     |                                      |  |  |  |  |  |
|                                      |                                                                                                              |                                                                                              |                                                                                                                                                     |                                      |  |  |  |  |  |
|                                      |                                                                                                              |                                                                                              |                                                                                                                                                     |                                      |  |  |  |  |  |
| 8                                    | Patents planned, issued or pending                                                                           | <input checked="" type="checkbox"/> None                                                     | <table border="1"> <tr><td></td><td></td></tr> <tr><td></td><td></td></tr> <tr><td></td><td></td></tr> </table>                                     |                                      |  |  |  |  |  |
|                                      |                                                                                                              |                                                                                              |                                                                                                                                                     |                                      |  |  |  |  |  |
|                                      |                                                                                                              |                                                                                              |                                                                                                                                                     |                                      |  |  |  |  |  |
|                                      |                                                                                                              |                                                                                              |                                                                                                                                                     |                                      |  |  |  |  |  |
| 9                                    | Participation on a Data Safety Monitoring Board or Advisory Board                                            | <input type="checkbox"/> None                                                                | <table border="1"> <tr><td>Ad hoc advisory board member for GSK</td><td></td></tr> <tr><td></td><td></td></tr> <tr><td></td><td></td></tr> </table> | Ad hoc advisory board member for GSK |  |  |  |  |  |
| Ad hoc advisory board member for GSK |                                                                                                              |                                                                                              |                                                                                                                                                     |                                      |  |  |  |  |  |
|                                      |                                                                                                              |                                                                                              |                                                                                                                                                     |                                      |  |  |  |  |  |
|                                      |                                                                                                              |                                                                                              |                                                                                                                                                     |                                      |  |  |  |  |  |
| 10                                   | Leadership or fiduciary role in other board,                                                                 | <input checked="" type="checkbox"/> None                                                     | <table border="1"> <tr><td></td><td></td></tr> </table>                                                                                             |                                      |  |  |  |  |  |
|                                      |                                                                                                              |                                                                                              |                                                                                                                                                     |                                      |  |  |  |  |  |

|           |                                                                                  | Name all entities with whom you have this relationship or indicate none (add rows as needed) | Specifications/Comments (e.g., if payments were made to you or to your institution) |
|-----------|----------------------------------------------------------------------------------|----------------------------------------------------------------------------------------------|-------------------------------------------------------------------------------------|
|           | society, committee or advocacy group, paid or unpaid                             |                                                                                              |                                                                                     |
| <b>11</b> | Stock or stock options                                                           | <input checked="" type="checkbox"/> <b>None</b>                                              |                                                                                     |
|           |                                                                                  |                                                                                              |                                                                                     |
|           |                                                                                  |                                                                                              |                                                                                     |
| <b>12</b> | Receipt of equipment, materials, drugs, medical writing, gifts or other services | <input checked="" type="checkbox"/> <b>None</b>                                              |                                                                                     |
|           |                                                                                  |                                                                                              |                                                                                     |
|           |                                                                                  |                                                                                              |                                                                                     |
| <b>13</b> | Other financial or non-financial interests                                       | <input type="checkbox"/> <b>None</b>                                                         |                                                                                     |
|           |                                                                                  | Clinical trial support from Gilead and Pfizer                                                |                                                                                     |
|           |                                                                                  |                                                                                              |                                                                                     |
|           |                                                                                  |                                                                                              |                                                                                     |

Please place an "X" next to the following statement to indicate your agreement:

I certify that I have answered every question and have not altered the wording of any of the questions on this form.

## ICMJE DISCLOSURE FORM

**Date:** 3/22/2022

**Your Name:** Yumi Asukai

**Manuscript Title:** Impact of belimumab on organ damage in systemic lupus erythematosus

**Manuscript Number (if known):** ACR-21-0855.R1

In the interest of transparency, we ask you to disclose all relationships/activities/interests listed below that are related to the content of your manuscript. "Related" means any relation with for-profit or not-for-profit third parties whose interests may be affected by the content of the manuscript. Disclosure represents a commitment to transparency and does not necessarily indicate a bias. If you are in doubt about whether to list a relationship/activity/interest, it is preferable that you do so.

The following questions apply to the author's relationships/activities/interests as they relate to the current manuscript only.

The author's relationships/activities/interests should be defined broadly. For example, if your manuscript pertains to the epidemiology of hypertension, you should declare all relationships with manufacturers of antihypertensive medication, even if that medication is not mentioned in the manuscript.

In item #1 below, report all support for the work reported in this manuscript without time limit. For all other items, the time frame for disclosure is the past 36 months.

|                                                                                                                                                            | Name all entities with whom you have this relationship or indicate none (add rows as needed)                                                                            | Specifications/Comments (e.g., if payments were made to you or to your institution)                                                                                                                                                                                                                                                                                                                                                                                                                                                                                                           |                                                                   |  |                                                                                                                                                            |  |  |  |  |  |
|------------------------------------------------------------------------------------------------------------------------------------------------------------|-------------------------------------------------------------------------------------------------------------------------------------------------------------------------|-----------------------------------------------------------------------------------------------------------------------------------------------------------------------------------------------------------------------------------------------------------------------------------------------------------------------------------------------------------------------------------------------------------------------------------------------------------------------------------------------------------------------------------------------------------------------------------------------|-------------------------------------------------------------------|--|------------------------------------------------------------------------------------------------------------------------------------------------------------|--|--|--|--|--|
| Time frame: Since the initial planning of the work                                                                                                         |                                                                                                                                                                         |                                                                                                                                                                                                                                                                                                                                                                                                                                                                                                                                                                                               |                                                                   |  |                                                                                                                                                            |  |  |  |  |  |
| 1                                                                                                                                                          | All support for the present manuscript (e.g., funding, provision of study materials, medical writing, article processing charges, etc.)<br>No time limit for this item. | <input type="checkbox"/> None<br><table border="1" style="width: 100%; border-collapse: collapse;"> <tr> <td style="width: 60%; padding: 5px;">Funding for this research was provided by<br/><br/>GlaxoSmithKline.</td> <td style="width: 40%;"></td> </tr> <tr> <td style="padding: 5px;">Medical writing support was provided by Casmira Brazaitis, PhD, of Fishawack Indicia Ltd, UK, part of Fishawack Health, and was funded by GlaxoSmithKline.</td> <td></td> </tr> <tr> <td style="height: 20px;"></td> <td></td> </tr> <tr> <td style="height: 20px;"></td> <td></td> </tr> </table> | Funding for this research was provided by<br><br>GlaxoSmithKline. |  | Medical writing support was provided by Casmira Brazaitis, PhD, of Fishawack Indicia Ltd, UK, part of Fishawack Health, and was funded by GlaxoSmithKline. |  |  |  |  |  |
| Funding for this research was provided by<br><br>GlaxoSmithKline.                                                                                          |                                                                                                                                                                         |                                                                                                                                                                                                                                                                                                                                                                                                                                                                                                                                                                                               |                                                                   |  |                                                                                                                                                            |  |  |  |  |  |
| Medical writing support was provided by Casmira Brazaitis, PhD, of Fishawack Indicia Ltd, UK, part of Fishawack Health, and was funded by GlaxoSmithKline. |                                                                                                                                                                         |                                                                                                                                                                                                                                                                                                                                                                                                                                                                                                                                                                                               |                                                                   |  |                                                                                                                                                            |  |  |  |  |  |
|                                                                                                                                                            |                                                                                                                                                                         |                                                                                                                                                                                                                                                                                                                                                                                                                                                                                                                                                                                               |                                                                   |  |                                                                                                                                                            |  |  |  |  |  |
|                                                                                                                                                            |                                                                                                                                                                         |                                                                                                                                                                                                                                                                                                                                                                                                                                                                                                                                                                                               |                                                                   |  |                                                                                                                                                            |  |  |  |  |  |
| Time frame: past 36 months                                                                                                                                 |                                                                                                                                                                         |                                                                                                                                                                                                                                                                                                                                                                                                                                                                                                                                                                                               |                                                                   |  |                                                                                                                                                            |  |  |  |  |  |
| 2                                                                                                                                                          | Grants or contracts from any entity (if not indicated in item #1 above).                                                                                                | <input checked="" type="checkbox"/> None<br><table border="1" style="width: 100%; border-collapse: collapse;"> <tr> <td style="width: 60%; height: 20px;"></td> <td style="width: 40%;"></td> </tr> <tr> <td style="height: 20px;"></td> <td></td> </tr> <tr> <td style="height: 20px;"></td> <td></td> </tr> </table>                                                                                                                                                                                                                                                                        |                                                                   |  |                                                                                                                                                            |  |  |  |  |  |
|                                                                                                                                                            |                                                                                                                                                                         |                                                                                                                                                                                                                                                                                                                                                                                                                                                                                                                                                                                               |                                                                   |  |                                                                                                                                                            |  |  |  |  |  |
|                                                                                                                                                            |                                                                                                                                                                         |                                                                                                                                                                                                                                                                                                                                                                                                                                                                                                                                                                                               |                                                                   |  |                                                                                                                                                            |  |  |  |  |  |
|                                                                                                                                                            |                                                                                                                                                                         |                                                                                                                                                                                                                                                                                                                                                                                                                                                                                                                                                                                               |                                                                   |  |                                                                                                                                                            |  |  |  |  |  |

|    |                                                                                                              | Name all entities with whom you have this relationship or indicate none (add rows as needed) | Specifications/Comments (e.g., if payments were made to you or to your institution)                             |  |  |  |  |  |  |
|----|--------------------------------------------------------------------------------------------------------------|----------------------------------------------------------------------------------------------|-----------------------------------------------------------------------------------------------------------------|--|--|--|--|--|--|
| 3  | Royalties or licenses                                                                                        | <input checked="" type="checkbox"/> None                                                     |                                                                                                                 |  |  |  |  |  |  |
| 4  | Consulting fees                                                                                              | <input checked="" type="checkbox"/> None                                                     | <table border="1"> <tr><td></td><td></td></tr> <tr><td></td><td></td></tr> <tr><td></td><td></td></tr> </table> |  |  |  |  |  |  |
|    |                                                                                                              |                                                                                              |                                                                                                                 |  |  |  |  |  |  |
|    |                                                                                                              |                                                                                              |                                                                                                                 |  |  |  |  |  |  |
|    |                                                                                                              |                                                                                              |                                                                                                                 |  |  |  |  |  |  |
| 5  | Payment or honoraria for lectures, presentations, speakers bureaus, manuscript writing or educational events | <input checked="" type="checkbox"/> None                                                     |                                                                                                                 |  |  |  |  |  |  |
| 6  | Payment for expert testimony                                                                                 | <input checked="" type="checkbox"/> None                                                     | <table border="1"> <tr><td></td><td></td></tr> <tr><td></td><td></td></tr> <tr><td></td><td></td></tr> </table> |  |  |  |  |  |  |
|    |                                                                                                              |                                                                                              |                                                                                                                 |  |  |  |  |  |  |
|    |                                                                                                              |                                                                                              |                                                                                                                 |  |  |  |  |  |  |
|    |                                                                                                              |                                                                                              |                                                                                                                 |  |  |  |  |  |  |
| 7  | Support for attending meetings and/or travel                                                                 | <input checked="" type="checkbox"/> None                                                     | <table border="1"> <tr><td></td><td></td></tr> <tr><td></td><td></td></tr> <tr><td></td><td></td></tr> </table> |  |  |  |  |  |  |
|    |                                                                                                              |                                                                                              |                                                                                                                 |  |  |  |  |  |  |
|    |                                                                                                              |                                                                                              |                                                                                                                 |  |  |  |  |  |  |
|    |                                                                                                              |                                                                                              |                                                                                                                 |  |  |  |  |  |  |
| 8  | Patents planned, issued or pending                                                                           | <input checked="" type="checkbox"/> None                                                     | <table border="1"> <tr><td></td><td></td></tr> <tr><td></td><td></td></tr> <tr><td></td><td></td></tr> </table> |  |  |  |  |  |  |
|    |                                                                                                              |                                                                                              |                                                                                                                 |  |  |  |  |  |  |
|    |                                                                                                              |                                                                                              |                                                                                                                 |  |  |  |  |  |  |
|    |                                                                                                              |                                                                                              |                                                                                                                 |  |  |  |  |  |  |
| 9  | Participation on a Data Safety Monitoring Board or Advisory Board                                            | <input checked="" type="checkbox"/> None                                                     | <table border="1"> <tr><td></td><td></td></tr> <tr><td></td><td></td></tr> <tr><td></td><td></td></tr> </table> |  |  |  |  |  |  |
|    |                                                                                                              |                                                                                              |                                                                                                                 |  |  |  |  |  |  |
|    |                                                                                                              |                                                                                              |                                                                                                                 |  |  |  |  |  |  |
|    |                                                                                                              |                                                                                              |                                                                                                                 |  |  |  |  |  |  |
| 10 | Leadership or fiduciary role in other board,                                                                 | <input checked="" type="checkbox"/> None                                                     | <table border="1"> <tr><td></td><td></td></tr> </table>                                                         |  |  |  |  |  |  |
|    |                                                                                                              |                                                                                              |                                                                                                                 |  |  |  |  |  |  |

|           |                                                                                  | Name all entities with whom you have this relationship or indicate none (add rows as needed)                                                                                                          | Specifications/Comments (e.g., if payments were made to you or to your institution) |
|-----------|----------------------------------------------------------------------------------|-------------------------------------------------------------------------------------------------------------------------------------------------------------------------------------------------------|-------------------------------------------------------------------------------------|
|           | society, committee or advocacy group, paid or unpaid                             |                                                                                                                                                                                                       |                                                                                     |
| <b>11</b> | Stock or stock options                                                           | <input type="checkbox"/> <b>None</b><br><input type="checkbox"/> Holds stocks and shares in GlaxoSmithKline<br><input type="checkbox"/><br><input type="checkbox"/>                                   |                                                                                     |
| <b>12</b> | Receipt of equipment, materials, drugs, medical writing, gifts or other services | <input checked="" type="checkbox"/> <b>None</b><br><input type="checkbox"/><br><input type="checkbox"/><br><input type="checkbox"/>                                                                   |                                                                                     |
| <b>13</b> | Other financial or non-financial interests                                       | <input type="checkbox"/> <b>None</b><br><input type="checkbox"/> Was an employee of GlaxoSmithKline at the time this manuscript was initiated<br><input type="checkbox"/><br><input type="checkbox"/> |                                                                                     |

**Please place an "X" next to the following statement to indicate your agreement:**

I certify that I have answered every question and have not altered the wording of any of the questions on this form.
